# Supplementary material for: Flexible interactions of the rare-earth elements Y, La, and Lu with phosphorus in metallacyclohexane rings
Source: Royal Society of Chemistry journal article supplement (doi:10.1039/d4sc02077d), 2024-01-01
Supplement: d4sc02077d1.pdf [file d4sc02077d1.pdf]

## **Flexible Interactions of the Rare-Earth Elements Y, La, and Lu with Phosphorus in Metallacyclohexane Rings**

## Table of Contents

|                                                                                                                                                                |                |
|----------------------------------------------------------------------------------------------------------------------------------------------------------------|----------------|
| <b>Glossary of Acronyms</b>                                                                                                                                    | <b>S3</b>      |
| <b>1. Experimental Details</b>                                                                                                                                 |                |
| <b>1.1 General Considerations</b>                                                                                                                              | <b>S4</b>      |
| <b>1.2 Synthetic Considerations</b>                                                                                                                            | <b>S5-S9</b>   |
| <b>1.3 Proposed Electronic Effects of M-P Bond</b>                                                                                                             | <b>S9</b>      |
| <b>2. Supplementary Data and Spectra</b>                                                                                                                       |                |
| <b>2.1 NMR Spectra</b>                                                                                                                                         | <b>S10-S29</b> |
| <b>2.2 IR (ATR) data</b>                                                                                                                                       | <b>S30-S34</b> |
| <b>2.3 Supplemental Figures, Tables, and Graphs</b>                                                                                                            | <b>S35-S38</b> |
| <b>3. Single Crystal X-ray Diffraction Data</b>                                                                                                                | <b>S39</b>     |
| <b>3.1 CCDC deposition numbers</b>                                                                                                                             | <b>S39</b>     |
| <b>3.2 <math>\text{ArBiAMP}^{\text{tBu}}</math></b>                                                                                                            | <b>S40-S41</b> |
| <b>3.3 <math>(\text{ArBiAMP}^{\text{tBu}})\text{CH}_2</math></b>                                                                                               | <b>S42-S43</b> |
| <b>3.4 <math>\text{Yl}(\text{ArBiAMP}^{\text{tBu}})(\text{thf})_3</math> (1)</b>                                                                               | <b>S44-S46</b> |
| <b>3.5 <math>\text{La}(\text{ArBiAMP}^{\text{tBu}})(\text{thf})_3</math> (2)</b>                                                                               | <b>S47-S49</b> |
| <b>3.6 <math>\text{Lu}(\text{ArBiAMP}^{\text{tBu}})(\text{thf})_3</math> (3)</b>                                                                               | <b>S50-S52</b> |
| <b>3.7 <math>\text{Y}(\eta^5\text{-}(1,3\text{-diisopropyl-4,7-dimethylindenyl})(\text{ArBiAMP}^{\text{tBu}})(\text{thf})</math> (4)</b>                       | <b>S53-S55</b> |
| <b>3.8 <math>\text{Y}(\eta^5\text{-}(1,3\text{-diisopropyl-4,7-dimethylindenyl})(\text{ArBiAMP}^{\text{tBu}})(\text{thf})(\text{Et}_2\text{O})</math> (4a)</b> | <b>S56</b>     |
| <b>3.9 <math>\text{La}(\eta^5\text{-}(1,3\text{-diisopropyl-4,7-dimethylindenyl})(\text{ArBiAMP}^{\text{tBu}})(\text{thf})_2</math> (5)</b>                    | <b>S57-S59</b> |
| <b>3.10 <math>\text{Lu}(\eta^5\text{-}(1,3\text{-diisopropyl-4,7-dimethylindenyl})(\text{ArBiAMP}^{\text{tBu}})(\text{thf})</math> (6)</b>                     | <b>S60-S62</b> |
| <b>3.11 Connectivity of <math>[\text{La}(\eta^5\text{-}(1,3\text{-diisopropyl-4,7-dimethylindenyl})(\text{ArBiAMP}^{\text{tBu}}))_2</math></b>                 | <b>S63</b>     |
| <b>4. References</b>                                                                                                                                           | <b>S64</b>     |

## Glossary of Ligand Acronyms

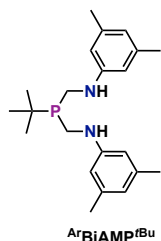

**bis((3,5-dimethylphenyl)-aminomethyl)<sup>tert</sup>butylphosphine**

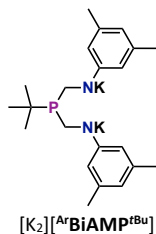

**dipotassium bis((3,5-dimethylphenyl)-amidomethyl)<sup>tert</sup>butylphosphine**

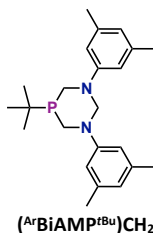

**1,3-bis((3,5-dimethylphenyl)-5-*tert*-butyl-1,3-diaza-5-phosphacyclohexane**

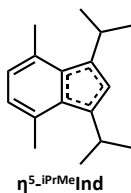

**potassium 1,3-Diisopropyl-4,7-dimethyl-indenide**

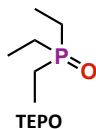

**Triethylphosphine oxide**

## 1. Additional Experimental Details

### 1.1 General Considerations

**Caution!** Na/K is a low-melting alloy of sodium and potassium with high reactivity and should be handled only by appropriately trained individuals. Here, we use a 1:1 (mol) ratio to generate the liquid alloy to dry the solvents.

All air- and moisture-sensitive manipulations were carried out in an MBraun dry box containing a purified argon atmosphere. The solvents THF, diethyl ether, toluene, and pentane (Sigma) were dried on Na/K and filtered through dry, neutral alumina, stored on 4 Å molecular sieves and tested with Na-benzophenone ketyl radical before use. *tert*-butylphosphine (95 % or 95 % as 10 wt % solution in hexanes, Strem), 3,5-dimethylaniline (99 %, Sigma), paraformaldehyde (99 atom %, Sigma) was degassed and stored in an inert atmosphere drybox before use. Anhydrous LaI<sub>3</sub> (99.9 %, VWR), LuI<sub>3</sub> (99.9 %, Sigma) and YI<sub>3</sub> (99.9 %, VWR) were used as received and kept in an air- and moisture-free environment. THF-*d*<sub>8</sub> and benzene-*d*<sub>6</sub> were dried using Na/K alloy and filtered through dry, neutral alumina and stored under argon on 4 Å molecular sieves. The reagents (trimethylsilyl)methyl potassium<sup>1</sup> and 1,3-diisopropyl-4,7-dimethyl-indene<sup>2</sup> were synthesized according to prior reports; potassium 1,3-diisopropyl-4,7-dimethyl-indenide was made by adding K-CH<sub>2</sub>SiMe<sub>3</sub> to the indene in THF prior to use. All NMR measurements for the metal complexes were conducted in J. Young valve NMR tubes sealed under an inert atmosphere of argon.

<sup>1</sup>H, <sup>13</sup>C{<sup>1</sup>H}, <sup>31</sup>P{<sup>1</sup>H}, and <sup>89</sup>Y NMR spectra were recorded on a Bruker Avance 400 MHz spectrometer operating at 400.132 MHz, 100.693 MHz, 161.978 MHz, and 19.61 MHz, respectively. The <sup>1</sup>H and <sup>13</sup>C chemical shifts are reported relative to SiMe<sub>4</sub> or *via* secondary standards based on residual solvent peaks relative to SiMe<sub>4</sub>; the <sup>31</sup>P chemical shifts are reported relative to the referenced <sup>1</sup>H NMR spectra; the <sup>89</sup>Y chemical shifts are reported relative to Y(NO<sub>3</sub>)<sub>3</sub> in H<sub>2</sub>O. CHN analyses were conducted by both Galbraith Laboratories and the University of Rochester CENTC Elemental Analysis Facility, B14 Hutchison Hall, 120 Trustee Road, Rochester, NY 14627. *Note on Elemental Analysis: The metal complexes routinely failed elemental analysis, with analytical results low in carbon. The data obtained for each complex was consistent with loss of coordinating solvent. We note that the complexes are not stable at ambient temperature, discoloring within hours in an inert atmosphere, likely arising from the loss of THF. We have collected each complex at least three times, with differing degrees of crystallinity, and including additional experiments intended to minimize KI-THF<sub>x</sub> contamination. This includes partial precipitation of material at -35 °C by adding incremental amounts of hexane to the THF solutions, with little effect on the EA results.*

UV-vis-NIR spectra were collected at RT on a Cary 5000 UV-Vis-NIR spectrophotometer from Agilent Technologies with different concentrations, which are noted. IR spectra were obtained using a Bruker Alpha II compact FT-IR spectrometer with an ATR attachment; 1-3 mg of material was used for the ATR-IR measurements.

Single crystals of complexes suitable for X-ray diffraction were coated with Krytox<sup>TM</sup> in a dry box, placed on a nylon loop and then transferred to a goniometer head of a Bruker D8 Quest equipped with a graphite-monochromatized molybdenum K $\alpha$  X-ray tube ( $\lambda = 0.71073$  Å) and a CMOS detector, or the goniometer head of a Bruker D8 Quest using a Mo K $\alpha$  ( $\alpha = 0.71073$  Å)  $\mu$ S 3.0 Microfocus source X-ray generator.<sup>3</sup> A hemisphere routine was used for data collection and determination of lattice constants. The space group was identified, and the data were processed using the Bruker SAINT+ program and corrected for absorption using SADABS.<sup>4-8</sup> The structures were solved using direct methods (SHELXS) completed by subsequent Fourier synthesis and refined by full-matrix least-squares procedures.<sup>4</sup> Olex2 software was used as the graphical interface.<sup>9,10</sup> Crystallographic data for all structures are available from the Cambridge Structural Database.

**Graphical Key for the NMR Assignments: Correlating Shifts to Structure.** The resonances for the BiAMP fragment are related to their assignment in the NMR spectra through the shorthand notation given.

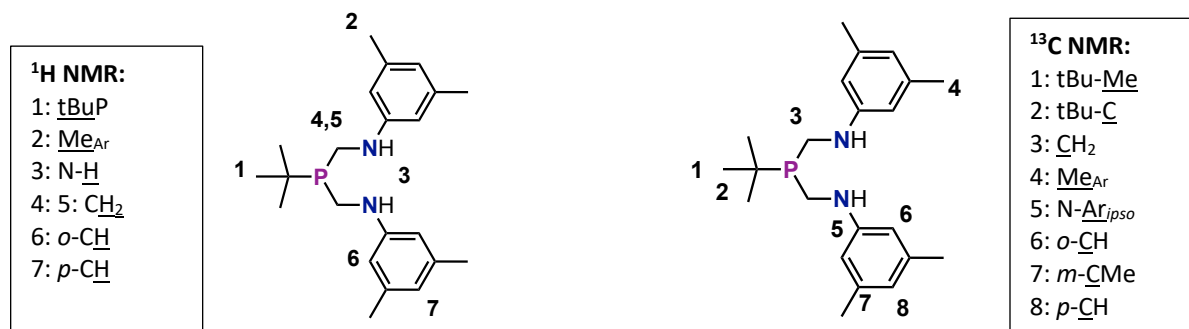

## 1.2. Synthetic Considerations

### Synthesis of bis((3,5-dimethylphenyl)-aminomethyl)<sup>tert</sup>butylphosphine (<sup>Ar</sup>BiAMP<sup>tBu</sup>)

In an inert atmosphere glove box, paraformaldehyde (0.636 g, 21.19 mmol; 2.01 equiv.) was placed in a 20 ml scintillation vial and suspended in 15 ml of toluene. To this suspension, <sup>tert</sup>butylphosphine (1.00 g, 10.54 mmol; 1.0 equiv.) was added at room temperature. The resulting mixture was stirred for 5 min followed by addition of 3,5-dimethylaniline (2.568 g, 21.19 mmol, 2.61 ml; 2.01 equiv.). The vial was sealed, and the reaction mixture was heated to 70 °C and stirred for 48 h. The initial pale-yellow opaque mixture turns nearly colorless, and a white precipitate formed over the course of the reaction. The mixture was allowed to cool to room temperature, and the precipitate was then removed using a glass filter frit and washed with 3 x 2 ml of toluene. The volatiles were then removed, and the pale-yellow, waxy solid residue was dissolved in a minimum amount (ca. 15 ml) of pentane with heating to 40 °C. Crystallization of the product from pentane at room temperature or at -35 °C resulted in the formation of crystalline blocks. <sup>Ar</sup>BiAMP<sup>tBu</sup> was isolated in 66% crystalline yield (2.479 g, 6.95 mmol).

<sup>1</sup>H NMR (400.13 MHz, C<sub>6</sub>D<sub>6</sub>) δ ppm 6.44 (s, 2H, *p*-CH), 6.26 (s, 4H, *o*-CH), 3.64 (brs, 2H, N-H), 3.25 (dt, *J*<sub>1</sub> = 12.8 Hz, *J*<sub>2</sub> = 5.2 Hz; 2H, CH<sub>2</sub>), 3.12 (dd, *J*<sub>1</sub> = 12.4 Hz, *J*<sub>2</sub> = 5.2 Hz; 2H, CH<sub>2</sub>), 2.21 (s, 12H, Me<sub>Ar</sub>), 0.95 (d, *J* = 11.6 Hz; 9H, tBuP). <sup>13</sup>C{<sup>1</sup>H} NMR (100.62 MHz, C<sub>6</sub>D<sub>6</sub>) δ ppm 149.2 (d, *J* = 8.0 Hz, N-Ar<sub>ipso</sub>), 138.7 (*m*-CMe), 120.3 (*p*-CH), 111.8 (*o*-CH), 40.5 (d, *J* = 13.1 Hz, CH<sub>2</sub>), 28.0 (d, *J* = 12.1 Hz, tBu-C), 27.7 (d, *J* = 12.1 Hz, tBu-Me), 21.8 (Me<sub>Ar</sub>). <sup>31</sup>P{<sup>1</sup>H} NMR (161.98 MHz, C<sub>6</sub>D<sub>6</sub>) δ ppm -6.25 (s, tBuP). Elemental Analysis for C<sub>22</sub>H<sub>33</sub>N<sub>2</sub>P: calcd. %C 74.12, %H 9.33, %N 7.86; Anal. %C 74.50, %H 9.49, %N 7.84.

### Isolation and characterization of 1,3-bis(3,5-dimethylphenyl)-5-*tert*-butyl-1,3-diaza-5-phosphacyclohexane ((<sup>Ar</sup>BiAMP<sup>tBu</sup>)CH<sub>2</sub>).

Following two crystallization cycles of <sup>Ar</sup>BiAMP<sup>tBu</sup> from pentane at room temperature from the initial (unoptimized) ligand synthesis, the remaining material was crystallized from pentane at -35 °C. This material contained roughly 85% of the cyclic biproduct ((<sup>Ar</sup>BiAMP<sup>tBu</sup>)CH<sub>2</sub>). This mixture was recrystallized by dissolution into warm (~40 °C) pentane followed by cooling to -35 °C, resulting in fine needles of ((<sup>Ar</sup>BiAMP<sup>tBu</sup>)CH<sub>2</sub>) in a roughly 95% purity, with small resonances attributed to <sup>Ar</sup>BiAMP<sup>tBu</sup> present as minor peaks in the NMR spectra.

<sup>1</sup>H NMR (400.13 MHz, C<sub>6</sub>D<sub>6</sub>) δ ppm 6.73 (s, 2H, *p*-CH), 6.45 (s, 4H, *o*-CH), 5.08 (d, 1H, *J* = 12.8 Hz, N-CH<sub>2</sub>-N), 4.20 (dd, 2H, *J* = 12.8 Hz, 2.7 Hz, N-CH<sub>2</sub>-N), 3.84 (dd, *J*<sub>1</sub> = 17.7 Hz, *J*<sub>2</sub> = 13.5 Hz; 2H, CH<sub>2</sub>), 3.36 (dd, *J*<sub>1</sub> = 13.5 Hz, *J*<sub>2</sub> = 5.3 Hz; 2H, CH<sub>2</sub>), 2.00 (s, 12H, Me<sub>Ar</sub>), 0.93 (d, *J* = 11.3 Hz; 9H, tBuP). <sup>13</sup>C{<sup>1</sup>H} NMR (100.62 MHz, C<sub>6</sub>D<sub>6</sub>) δ ppm 150.4 (s, N-Ar<sub>ipso</sub>), 138.7 (*m*-CMe), 121.9 (*p*-CH), 115.2 (*o*-CH), 70.4 (d, *J* = 22.0 Hz, N-CH<sub>2</sub>-N), 40.5 (d, *J* = 13.1 Hz, CH<sub>2</sub>), 27.7 (d, *J* = 13.8 Hz, tBu-Me), 27.6 (d, *J* = 16.8 Hz, tBu-C), 21.8 (Me<sub>Ar</sub>). <sup>31</sup>P{<sup>1</sup>H} NMR (161.98 MHz, C<sub>6</sub>D<sub>6</sub>) δ ppm -41.2 (tBuP). Elemental Analysis for C<sub>23</sub>H<sub>33</sub>N<sub>2</sub>P: calcd. %C 74.76, %H 9.03, %N 7.60; Anal. %C 74.75, %H 8.96, %N 7.62.

### NMR Characterization of [K]<sub>2</sub>[<sup>Ar</sup>BiAMP<sup>tBu</sup>].

<sup>1</sup>H NMR (400.13 MHz, C<sub>6</sub>D<sub>6</sub>) δ ppm 5.79 (s, 2H, *p*-CH), 5.43 (s, 4H, *o*-CH), 3.47 (dd, *J*<sub>1</sub> = 12.6 Hz, *J*<sub>2</sub> = 8.6 Hz; 2H, CH<sub>2</sub>), 3.28 (dd, *J*<sub>1</sub> = 12.6 Hz, *J*<sub>2</sub> = 8.6 Hz; 2H, CH<sub>2</sub>), 2.01 (s, 12H, Me<sub>Ar</sub>), 1.21 (d, *J* = 9.5 Hz; 9H, tBuP). <sup>13</sup>C{<sup>1</sup>H} NMR (100.62 MHz, C<sub>6</sub>D<sub>6</sub>) δ ppm 162.7 (d, *J* = 13.8 Hz, N-Ar<sub>ipso</sub>), 138.2 (*m*-CMe), 110.0 (*p*-CH), 108.6 (*o*-CH), 51.6 (s, CH<sub>2</sub>), 29.1 (d, *J* = 10.8 Hz, tBu-Me), 28.7 (d, *J* = 12.7 Hz, tBu-C), 22.6 (Me<sub>Ar</sub>). <sup>31</sup>P{<sup>1</sup>H} NMR (161.98 MHz, C<sub>6</sub>D<sub>6</sub>) δ ppm -18.4 (tBuP).

### General Procedure I: synthesis of (<sup>Ar</sup>BiAMP<sup>tBu</sup>)MI(thf)<sub>3</sub> (M = Y, La, Lu)

In a glove box under inert Ar atmosphere, MI<sub>3</sub> starting material (1.0 equiv.) was placed in a 20 ml scintillation vial, suspended in THF and stirred at ambient temperature for 1 h until a white slurry of MI<sub>3</sub>-thf adduct formed. The resulting mixture was cooled to -35 °C. In a separate reaction vial, <sup>Ar</sup>BiAMP<sup>tBu</sup> ligand (1.01 equiv.) was dissolved in THF and cooled to -35 °C. A freshly prepared solution of (trimethylsilyl)methyl potassium (2.02 equiv.) in cold THF was then added dropwise to the pre-cooled solution of <sup>Ar</sup>BiAMP<sup>tBu</sup>. This reaction mixture was then cooled at -35 °C for 20 min, and the resulting clear light-green homogeneous solution of the <sup>Ar</sup>BiAMP<sup>tBu</sup> bis(potassium) salt was added dropwise to the cold stirring slurry of the MI<sub>3</sub>-thf adduct. The reaction mixture was then allowed to warm to room temperature and was stirred for 3 h. White precipitated KI was separated from the reaction mixture using centrifugation (10 min @5,000 rpm) and filtration through a glass fiber filter. Homogeneous filtrate was then concentrated under reduced pressure, and the residue was recrystallized using either vapor diffusion of pentane into concentrated THF solution of the crude material or by layering technique using the same solvents at -35 °C. During <sup>1</sup>H NMR analysis of coordination complexes, the observed multiplet resonances at δ 3.64-3.59 ppm and δ 1.78-1.73 ppm, attributed to the

coordinated THF ligand, were observed to have variable integration values attributed exchange with THF-*d*<sub>8</sub> used as a solvent for NMR samples of the title compound.

***tert*-Butyl(bis(methyleneamido3,5-dimethylphenyl))phosphine-yttrium(III)iodide tris(tetrahydrofuran) complex (1)**

The title compound was prepared according to General Procedure I using YI<sub>3</sub> (319.3 mg; 0.68 mmol) suspended in 4.0 ml of THF. Bis(potassium) salt of <sup>Ar</sup>BiAMP<sup>tBu</sup> ligand was prepared in 6.0 ml of THF using <sup>Ar</sup>BiAMP<sup>tBu</sup> (244 mg; 0.69 mmol) and (trimethylsilyl)methylpotassium (173.3 mg; 1.37 mmol). The title compound was isolated as crystalline off-white solid (483 mg; 0.61 mmol) in 90% crystalline yield. Single crystals suitable for SC-XRD analysis were obtained by slow vapor diffusion at -35 °C (48-72 h) using pentane and concentrated THF solution of the title compound.

<sup>1</sup>H NMR (400.13 MHz, THF-*d*<sub>8</sub>) δ ppm 6.22 (s, 4H, *o*-CH), 5.98 (s, 2H, *p*-CH), 3.64-3.59 (m, 6H, (thf-OCH<sub>2</sub>-), 3.47 (dd, 2H, *J*<sub>1</sub> = 11.6 Hz, *J*<sub>2</sub> = 7.6 Hz, CH<sub>2</sub>), 3.34 (d, 2H, *J* = 11.6 Hz, CH<sub>2</sub>), 2.14 (s, 12H, Me<sub>Ar</sub>), 1.78-1.73 (m, 6H, thf-CH<sub>2</sub>-), 1.25 (d, 9H, *J* = 11.6 Hz, tBuP). <sup>13</sup>C {<sup>1</sup>H} NMR (100.62 MHz, THF-*d*<sub>8</sub>) δ ppm 157.9 (d, *J* = 19.9 Hz, N-Ar<sub>ipso</sub>), 137.8 (*m*-CMe), 115.4 (*p*-CH), 110.1 (*o*-CH), 68.0 (thf-OCH<sub>2</sub>-), 48.2 (d, *J* = 4.7 Hz, CH<sub>2</sub>), 28.2 (d, *J* = 10.6 Hz, tBu-C), 28.1 (d, *J* = 7.2 Hz, tBu-C), 25.6 (thf-CH<sub>2</sub>-), 21.6 (Me<sub>Ar</sub>). <sup>31</sup>P {<sup>1</sup>H} NMR (161.98 MHz, THF-*d*<sub>8</sub>) δ ppm -15.7 (d, *J* = 2.8 Hz). <sup>89</sup>Y NMR (19.62 MHz, THF-*d*<sub>8</sub>) δ ppm 422.4 (d, *J* = 2.7 Hz, tBuP). Elemental Analysis (see note above) for: C<sub>34</sub>H<sub>55</sub>IN<sub>2</sub>O<sub>3</sub>PY calcd. %C, 51.92, %H, 7.05, %N 3.56; Anal. %C, 50.82, %H, 6.86, %N, 3.36.

***tert*-Butyl(bis(methyleneamido3,5-dimethylphenyl))phosphine-lanthanum(III)iodide tris(tetrahydrofuran) complex (2)**

The title compound was prepared according to General Procedure I using LaI<sub>3</sub> (358.5 mg; 0.69 mmol) suspended in 4.0 ml of THF. Bis(potassium) salt of <sup>Ar</sup>BiAMP<sup>tBu</sup> ligand was prepared in 6.0 ml of THF using <sup>Ar</sup>BiAMP<sup>tBu</sup> (250 mg; 0.70 mmol) and (trimethylsilyl)methylpotassium (178.1 mg; 1.41 mmol). The title compound was isolated as crystalline off-white solid (525 mg; 0.63 mmol) in 91.3% crystalline yield. Single crystals suitable for SC-XRD analysis were obtained by slow vapor diffusion at -35 °C (48-72 h) using pentane and concentrated THF solution of the title compound.

<sup>1</sup>H NMR (400.13 MHz, THF-*d*<sub>8</sub>) δ ppm. 6.11 (s, 4H, *o*-CH), 6.00 (s, 2H, *p*-CH), 3.63-3.59 (m, 10H, thf-OCH<sub>2</sub>- & CH<sub>2</sub>), 3.45 (d, 2H, *J* = 12 Hz, CH<sub>2</sub>), 2.15 (s, 12H, Me<sub>Ar</sub>), 1.80-1.73 (m, 8H, thf-CH<sub>2</sub>-), 1.25 (d, 9H, *J* = 11.6 Hz, tBuP). Note: a multiplet resonance at δ 3.63-3.59 (THF) is partially overlapped with one of the methylene (-CH<sub>2</sub>-) group signals of the <sup>Ar</sup>BiAMP<sup>tBu</sup> ligand. <sup>13</sup>C {<sup>1</sup>H} NMR (100.62 MHz, THF-*d*<sub>8</sub>) δ ppm 157.3 (d, *J* = 18.3 Hz, N-Ar<sub>ipso</sub>), 138.6 (*m*-CMe), 115.5 (*p*-CH), 108.4 (*o*-CH), 68.0 (thf-OCH<sub>2</sub>-), 48.1 (CH<sub>2</sub>), 28.0 (d, *J* = 10.4 Hz, tBu-C), 26.1 (thf-CH<sub>2</sub>-), 21.7 (Me<sub>Ar</sub>). <sup>31</sup>P {<sup>1</sup>H} NMR (161.98 MHz, THF-*d*<sub>8</sub>) δ ppm -16.3 (tBuP). Elemental Analysis (see note above) for: C<sub>34</sub>H<sub>55</sub>ILa<sub>2</sub>O<sub>3</sub>P calcd. %C, 48.81, %H, 6.63, %N, 3.35; Anal. %C, 47.65, %H, 6.61, %N, 3.07.

***tert*-Butyl(bis(methyleneamido3,5-dimethylphenyl))phosphine-lutetium(III)iodide tris(tetrahydrofuran) complex (3)**

The title compound was prepared according to General Procedure I using LuI<sub>3</sub> (377.9 mg; 0.68 mmol) suspended in 4.0 ml of THF. Bis(potassium) salt of <sup>Ar</sup>BiAMP<sup>tBu</sup> ligand was prepared in 6.0 ml of THF using <sup>Ar</sup>BiAMP<sup>tBu</sup> (244 mg; 0.69 mmol) and (trimethylsilyl)methylpotassium (173.3 mg; 1.37 mmol). The title compound was isolated as crystalline off-white solid (417.8 mg; 0.48 mmol) in 70.6% crystalline yield. Single crystals suitable for SC-XRD analysis were obtained by slow vapor diffusion at -35 °C (48-72 h) using pentane and concentrated THF solution of the title compound.

<sup>1</sup>H NMR (400.13 MHz, THF-*d*<sub>8</sub>) δ ppm 6.34 (s, 4H, *o*-CH), 6.00 (s, 2H, *p*-CH), 3.64-3.59 (m, 10H, thf-OCH<sub>2</sub>-), 3.54 (dd, 2H, *J*<sub>1</sub> = 11.6 Hz, *J*<sub>2</sub> = 7.6 Hz, CH<sub>2</sub>), 3.35 (dd, 2H, *J*<sub>1</sub> = 12 Hz, *J*<sub>2</sub> = 1.6 Hz, CH<sub>2</sub>), 2.15 (s, 12H, Me<sub>Ar</sub>), 1.80-1.73 (m, 10H, thf-CH<sub>2</sub>-), 1.25 (d, 9H, *J* = 11.6 Hz, tBuP). <sup>13</sup>C NMR (100.62 MHz, THF-*d*<sub>8</sub>) δ ppm 157.9 (d, *J* = 18.3 Hz, N-Ar<sub>ipso</sub>), 137.6 (*m*-CMe), 115.5 (*p*-CH), 110.5 (*o*-CH), 68.0 (thf-OCH<sub>2</sub>-), 48.3 (CH<sub>2</sub>), 28.2 (d, *J* = , tBu-C), , 27.9 (d, *J* = tBu-Me), 26.0 (thf-CH<sub>2</sub>-), 21.5 (Me<sub>Ar</sub>). <sup>31</sup>P NMR (161.98 MHz, THF-*d*<sub>8</sub>) δ ppm -18.2 (s, tBuP). Elemental Analysis (see note above) for: C<sub>34</sub>H<sub>55</sub>ILuN<sub>2</sub>O<sub>3</sub>P calcd. %C, 46.80, %H, 6.35, %N, 3.21; Anal. %C, 45.05, %H, 6.20, %N, 2.93.

**Graphical Key for the NMR Assignments: Correlating Shifts to Structure.** Additional resonances for the Indenide fragment are related to their assignment in the NMR spectra through the shorthand notation given.

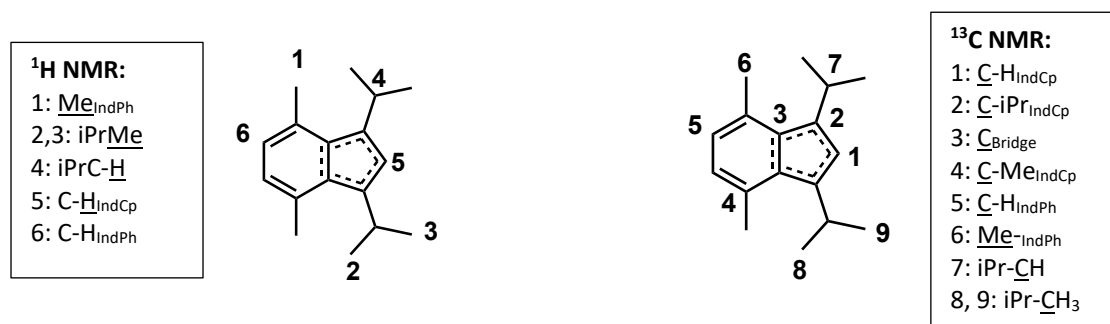

**General Procedure II: synthesis of  $\text{M}(\text{ArBiAMP}^{\text{tBu}})(\eta^5\text{-1,3-Diisopropyl-4,7-dimethyl-indenide})(\text{thf})_n$  ( $\text{M} = \text{La}$  ( $n = 2$ ),  $\text{Lu}$ ,  $\text{Y}$  ( $n = 1$ ))**

In a glove box under inert Ar atmosphere,  $(\text{ArBiAMP}^{\text{tBu}})\text{MI}(\text{thf})_3$  (1.0 equiv.) was placed in a 20 ml scintillation vial, dissolved in THF, and cooled down to  $-35\text{ }^\circ\text{C}$ . In a separate vial 1,3-diisopropyl-4,7-dimethylindenyl potassium salt (1.01 equiv.) was dissolved in cold THF. This freshly prepared solution was then added dropwise to the pre-cooled solution of the  $(\text{ArBiAMP}^{\text{tBu}})\text{MI}(\text{thf})_3$  complex and the reaction mixture was then allowed to warm up to room temperature and was stirred for 3 h. White precipitate of KI was separated from the reaction mixture using centrifugation (10 min @5,000 rpm) and filtration through a glass fiber filter. Homogeneous filtrate was then concentrated under reduced pressure, and the residue was recrystallized using either vapor diffusion of pentane into concentrated THF solution of the crude material or by layering technique using the same solvents at  $-35\text{ }^\circ\text{C}$ . During  $^1\text{H}$  NMR analysis of coordination complexes, the observed multiplet resonances at  $\delta$  3.64-3.59 and  $\delta$  1.78-1.73 ppm, attributed to the coordinated THF ligand, were observed to have variable integration values attributed exchange with THF- $d_8$  used as a solvent for NMR samples of the title compound.

**$\eta^5\text{-}(1,3\text{-diisopropyl-4,7-dimethylindenyl})$  *tert*-Butyl(bis(methyleneamido3,5-dimethylphenyl))phosphine-yttrium(III)-tetrahydrofuran, (4)**

The title compound was prepared according to the General Procedure II using complex **1** (167.3 mg; 0.20 mmol) as a starting material and 1,3-diisopropyl-4,7-dimethylindenyl potassium salt (53.8 mg, 0.202 mmol) in 4.0 ml of THF. The title compound was isolated as crystalline pale-yellow solid (109.1 mg; 0.147 mmol) in 73.5 % crystalline yield. Single crystals suitable for SC-XRD analysis were obtained by slow vapor diffusion at  $-35\text{ }^\circ\text{C}$  (48-72 h) using pentane and concentrated THF solution of the title compound.

$^1\text{H}$  NMR (400.13 MHz, THF- $d_8$ )  $\delta$  ppm 7.16 (d,  $J = 4.4$  Hz; 1H,  $\text{C-H}_{\text{IndCp}}$ ), 6.67 (s, 2H,  $\text{C-H}_{\text{IndPh}}$ ), 5.95 (s, 2H,  $p\text{-CH}$ ), 5.69 (s, 4H,  $o\text{-CH}$ ), 3.62 (sep,  $J = 6.8$  Hz; 2H,  $\text{iPrC-H}$ ), 3.56-3.52 (m, 1H,  $\text{thf-OCH}_2\text{-}$ ), 3.44 (dd,  $J_1 = 11.6$  Hz,  $J_2 = 8.0$  Hz; 2H,  $\text{CH}_2$ ), 3.34 (d,  $J = 11.6$  Hz; 2H,  $\text{CH}_2$ ), 2.81 (s, 6H,  $\text{Me}_{\text{IndPh}}$ ), 2.08 (s, 12H,  $\text{Me}_{\text{Ar}}$ ), 1.80-1.76 (m, 1H,  $\text{thf-CH}_2\text{-}$ ), 1.47 (d,  $J = 6.8$  Hz; 6H,  $\text{iPrMe}$ ), 1.31 (d,  $J = 12.8$  Hz; 9H,  $\text{tBuP}$ ), 1.08 (d,  $J = 6.8$  Hz; 6H,  $\text{iPrMe}$ ).  $^{13}\text{C}\{^1\text{H}\}$  NMR (100.62 MHz, THF- $d_8$ )  $\delta$  ppm 158.0 (dd,  $J = 21.9$ , 1.7 Hz,  $\text{N-Ar}_{\text{ipso}}$ ), 138.1 ( $m\text{-CMe}$ ), 130.5 ( $\text{C-Me}_{\text{IndCp}}$ ), 127.5 ( $\text{C}_{\text{Bridge}}$ ), 123.9 ( $\text{C-H}_{\text{IndPh}}$ ), 123.1 (d,  $J = 1.4$  Hz,  $\text{C-iPr}_{\text{IndCp}}$ ), 117.5 (d,  $J = 4.3$  Hz,  $\text{C-H}_{\text{IndCp}}$ ), 116.7 ( $p\text{-CH}$ ), 112.3 ( $o\text{-CH}$ ), 47.5 (d,  $J = 9.1$  Hz,  $\text{CH}_2$ ), 29.4 ( $\text{iPr-CH}_3$ ), 29.1 (d,  $J = 2.8$  Hz,  $\text{tBu-C}$ ), 28.7 ( $\text{iPr-CH}_3$ ), 28.4 (d,  $J = 9.5$  Hz,  $\text{tBu-Me}$ ), 23.5 (d,  $J = 3.3$  Hz,  $\text{iPr-CH}$ ), 22.8 ( $\text{Me}_{\text{IndPh}}$ ), 22.1 ( $\text{Me}_{\text{Ar}}$ ).  $^{31}\text{P}\{^1\text{H}\}$  NMR (161.98 MHz, THF- $d_8$ )  $\delta$  ppm -13.6 (d,  $J = 17.5$  Hz).  $^{89}\text{Y}$  NMR (19.62 MHz, THF- $d_8$ )  $\delta$  ppm 176.0 (d,  $J = 17.4$  Hz). Elemental Analysis (see note above) for:  $\text{C}_{43}\text{H}_{62}\text{N}_2\text{OPY}$  calcd. %C, 69.52, %H, 8.41, %N, 3.77; Anal. %C, 68.18, %H, 8.42, %N, 3.62.

**$\eta^5\text{-}(1,3\text{-diisopropyl-4,7-dimethylindenyl})$  *tert*-Butyl(bis(methyleneamido3,5-dimethylphenyl))phosphine lanthanum(III)-bis(tetrahydrofuran), (5)**

The title compound was prepared according to the General Procedure II using complex **2** (167.3 mg; 0.200 mmol) as a starting material and 1,3-diisopropyl-4,7-dimethylindenyl potassium salt (53.8 mg, 0.202 mmol) in 4.0 ml of THF. The title compound was isolated as crystalline pale-yellow solid (124.4 mg; 0.143 mmol) in 71.5 % crystalline yield. Single crystals suitable for SC-XRD analysis were obtained by slow vapor diffusion technique at  $-35\text{ }^\circ\text{C}$  (48-72 h) using pentane and concentrated THF solution of the title compound.

$^1\text{H}$  NMR (400.13 MHz, THF- $d_8$ )  $\delta$  ppm 7.03 (s, 1H,  $\text{C-H}_{\text{IndCp}}$ ), 6.59 (s, 2H,  $\text{C-H}_{\text{IndPh}}$ ), 5.93 (s, 2H,  $p\text{-CH}$ ), 5.76 (s, 4H,  $o\text{-CH}$ ), 3.68 (sep, 2H,  $J = 6.1$  Hz,  $\text{iPrC-H}$ ), 3.63-3.58 (m, 7H,  $\text{thf-OCH}_2\text{-}$ ), 3.46 (d, 2H,  $J = 12.2$  Hz,  $\text{CH}_2$ ), 3.30 (dd, 2H,  $J_1 = 12.3$  Hz,  $J_2 = 2.5$  Hz,  $\text{CH}_2$ ), 2.81 (s, 6H,  $\text{Me}_{\text{IndPh}}$ ), 2.09 (s, 12H,  $\text{Me}_{\text{Ar}}$ ), 1.81-1.74 (m, 8H,  $\text{thf-CH}_2\text{-}$ ), 1.54 (d,  $J = 6.8$  Hz, 6H,  $\text{iPrMe}$ ), 1.23 (d,  $J = 11.6$  Hz, 9H,  $\text{tBuP}$ ), 1.10 (d,  $J = 6.6$  Hz, 6H,  $\text{iPrMe}$ ). Note: multiplet signals at  $\delta$  3.61 and  $\delta$  1.76 ppm assigned to the coordinated THF ligand exhibited variable integration values due to partial

exchange with THF-*d*<sub>8</sub> used as a solvent for NMR samples of the title compound. <sup>13</sup>C{<sup>1</sup>H} NMR (100.62 MHz, THF-*d*<sub>8</sub>) δ ppm 156.5 (d, *J* = 16.2 Hz, N-Ar<sub>ipso</sub>), 138.9 (*m*-CMe), 129.8 (C-Me<sub>IndCp</sub>), 128.6 (C<sub>Bridge</sub>), 124.5 (C-H<sub>IndPh</sub>), 122.5 (C-iPr<sub>IndCp</sub>), 117.2 (d, *J* = 6.0 Hz, C-H<sub>IndCp</sub>), 116.0 (*p*-CH), 109.35 (*o*-CH), 48.4 (CH<sub>2</sub>), 29.8 (iPr-CH<sub>3</sub>), 29.1 (iPr-CH<sub>3</sub>), 28.8 (d, *J* = 8.3 Hz, tBu-C), 28.4 (d, *J* = 10.3 Hz, tBu-Me), 23.5 (d, *J* = 2.6 Hz, iPr-CH), 22.7 (Me-<sub>IndPh</sub>), 22.1 (Me<sub>Ar</sub>). <sup>31</sup>P{<sup>1</sup>H} NMR (161.98 MHz, THF-*d*<sub>8</sub>) δ ppm -18.1 (s). Elemental Analysis (see note above) for: C<sub>47</sub>H<sub>70</sub>LaN<sub>2</sub>O<sub>2</sub>P calcd. %C, 65.26, %H, 8.16, %N, 3.24; Anal. %C, 62.02, %H, 7.80, %N, 3.12.

**η<sup>5</sup>-(1,3-diisopropyl-4,7-dimethylindenyl) tert-Butyl(bis(methyleneamido)3,5-dimethylphenyl)phosphine-lutetium(III)-tetrahydrofuran, (6)**

The title compound was prepared according to the General Procedure II using complex **3** (174.5 mg; 0.200 mmol) as a starting material and 1,3-diisopropyl-4,7-dimethylindenyl potassium salt (53.8 mg, 0.202 mmol) in 4.0 ml of THF. The title compound was isolated as crystalline colorless solid (108.2 mg; 0.130 mmol) in 65% crystalline yield. Single crystals suitable for SC-XRD analysis were obtained by slow vapor diffusion technique at -35 °C (48-72 h) using pentane and concentrated THF solution of the title compound.

<sup>1</sup>H NMR (400.13 MHz, THF-*d*<sub>8</sub>) δ ppm 7.09 (d, *J* = 5.6 Hz; 1H, C-H<sub>IndCp</sub>), 6.65 (s, 2H, C-H<sub>IndPh</sub>), 5.95 (s, 2H, *p*-CH), 5.73 (s, 4H, *o*-CH), 3.58-3.55 (m, 3H, thf-OCH<sub>2</sub>-), 3.47 (dd, *J*<sub>1</sub> = 11.6 Hz, *J*<sub>2</sub> = 7.2 Hz; 2H, CH<sub>2</sub>), 3.29 (d, *J* = 10.8 Hz; 2H, CH<sub>2</sub>), 2.80 (s, 6H, Me<sub>IndPh</sub>), 2.07 (s, 12H, Me<sub>Ar</sub>), 1.74-1.70 (m, 2H, thf-CH<sub>2</sub>-), 1.43 (d, *J* = 6.8 Hz; 6H, iPrMe), 1.29 (d, *J* = 12.8 Hz; 9H, tBuP), 1.05 (d, *J* = 6.4 Hz; 6H, iPrMe). Note: the isopropyl methine overlaps with the THF / THF-*d*<sub>8</sub> resonances. <sup>13</sup>C{<sup>1</sup>H} NMR (100.62 MHz, THF-*d*<sub>8</sub>) δ ppm 158.0 (d, *J* = 22.5 Hz, N-Ar<sub>ipso</sub>), 137.8 (*m*-CMe), 130.7 (C-Me<sub>IndCp</sub>), 127.3 (C<sub>Bridge</sub>), 123.9 (C-H<sub>IndPh</sub>), 121.6 (C-iPr<sub>IndCp</sub>), 117.9 (d, *J* = 6.0 Hz, C-H<sub>IndCp</sub>), 116.7 (*p*-CH), 111.6 (*o*-CH), 47.2 (d, *J* = 9.2 Hz, CH<sub>2</sub>), 29.3 (iPr-CH<sub>3</sub>), 29.1 (d, *J* = 3.5 Hz, tBu-C), 28.6 (iPr-CH<sub>3</sub>), 28.3 (d, *J* = 8.7 Hz, tBu-Me), 23.2 (d, *J* = 3.3 Hz, iPr-CH), 22.8 (Me-<sub>IndPh</sub>), 22.0 (Me<sub>Ar</sub>). <sup>31</sup>P{<sup>1</sup>H} NMR (161.98 MHz, THF-*d*<sub>8</sub>) δ ppm -14.5. Elemental Analysis (see note above) for: C<sub>43</sub>H<sub>62</sub>LuN<sub>2</sub>OP calcd. %C, 62.31, %H, 7.54, %N, 3.38; Anal. %C, 61.28, %H, 7.52, %N, 3.52.

**Procedure for NMR scale addition of TEPO (P(O)Et<sub>3</sub>) to form **7**, **8**, and **9****

In an inert atmosphere Argon filled glovebox, Y(<sup>Ar</sup>BiAMP<sup>t</sup>Bu)(η<sup>5</sup>-iPrMeInd)(thf) (**4**, 46.5 mg, 0.062 mmol) was added to an oven-dried *J*-Young NMR tube and dissolved in approximately 0.750 g of THF-*d*<sub>8</sub>. To this solution, triethylphosphine oxide (8.5 mg, 1.0 equiv.) was added at rt. The reaction was sealed. The reaction remained homogenous and nearly colorless. The reaction mixture was then analyzed by NMR spectroscopy. **NMR analysis of **7****: <sup>1</sup>H NMR (400.13 MHz, THF-*d*<sub>8</sub>) δ ppm 6.94 (d, 1H, *J* = 2.5 Hz, C-H<sub>IndCp</sub>), 6.48 (s, 2H, C-H<sub>IndPh</sub>), 5.90 (s, 2H, *p*-CH), 5.77 (s, 4H, *o*-CH), 3.77 (sep, 2H, *J* = 6.7 Hz, iPrC-H), 3.33 (dd, 2H, *J*<sub>1</sub> = 11.5 Hz, *J*<sub>2</sub> = 6.9 Hz, CH<sub>2</sub>), 3.19 (d, 2H, *J*<sub>1</sub> = 11.3 Hz, CH<sub>2</sub>), 2.80 (s, 6H, Me<sub>IndPh</sub>), 2.09 (s, 12H, Me<sub>Ar</sub>), 1.50 (d, 6H, *J* = 6.6 Hz, iPrMe), 1.23 (d, 9H, *J* = 12.2 Hz, tBuP), 1.17 (m, 6H, TEPO-CH<sub>2</sub>), 1.10 (d, 6H, *J* = 6.5 Hz, iPrMe), 0.71 (dt, 9H, *J*<sub>1</sub> = 17.7 Hz, *J*<sub>2</sub> = 7.7 Hz, TEPO-CH<sub>3</sub>). <sup>13</sup>C{<sup>1</sup>H} NMR (100.62 MHz, THF-*d*<sub>8</sub>) δ ppm 159.1 (dd, *J* = 21.9, 1.7 Hz, N-Ar<sub>ipso</sub>), 137.4 (*m*-CMe), 129.3 (C-Me<sub>IndCp</sub>), 126.6 (C<sub>Bridge</sub>), 122.9 (C-H<sub>IndPh</sub>), 121.7 (d, *J* = 1.3 Hz, C-iPr<sub>IndCp</sub>), 115.7 (*p*-CH), 114.5 (d, *J* = 2.7 Hz, C-H<sub>IndCp</sub>), 112.2 (*o*-CH), 48.8 (d, *J* = 7.2 Hz, CH<sub>2</sub>), 29.2 (iPr-CH<sub>3</sub>), 28.7 (iPr-CH<sub>3</sub>), 28.5 (d, *J* = 5.8 Hz, tBu-C), 28.0 (d, *J* = 9.5 Hz, tBu-Me), 23.1 (Me-<sub>IndPh</sub>), 22.8 (iPr-CH), 21.7 (Me<sub>Ar</sub>), 17.3 (d, *J* = 66.2 Hz, TEPO-CH<sub>2</sub>), 5.0 (d, *J* = 4.4 Hz, TEPO-CH<sub>3</sub>). <sup>31</sup>P{<sup>1</sup>H} NMR (161.98 MHz, THF-*d*<sub>8</sub>) δ ppm 70.6 (dd, *J* = 10.0 Hz, 3.0 Hz, TEPO), -13.9 (dd, *J* = 10.2 Hz, 2.7 Hz, BiAMP).

In an inert atmosphere Argon filled glovebox, La(<sup>Ar</sup>BiAMP<sup>t</sup>Bu)(η<sup>5</sup>-iPrMeInd)(thf)<sub>2</sub> (**5**, 44.0 mg, 0.051 mmol) was added to an oven-dried *J*-Young NMR tube and dissolved in approximately 0.750 g of THF-*d*<sub>8</sub>. To this solution, triethylphosphine oxide (6.8 mg, 1.0 equiv.) was added at rt. The reaction was sealed. The reaction remained homogenous and nearly colorless. The reaction mixture was then analyzed by NMR spectroscopy. **NMR analysis of **8****: <sup>1</sup>H NMR (400.13 MHz, THF-*d*<sub>8</sub>) δ ppm 6.83 (s, 1H, C-H<sub>IndCp</sub>), 6.51 (s, 2H, C-H<sub>IndPh</sub>), 5.88 (s, 2H, *p*-CH), 5.72 (s, 4H, *o*-CH), 3.87 (sep, 2H, *J* = 6.6 Hz, iPrC-H), 3.39 (dd, 2H, *J*<sub>1</sub> = 11.6 Hz, *J*<sub>2</sub> = 7.6 Hz, CH<sub>2</sub>), 3.19 (dd, 2H, *J*<sub>1</sub> = 12 Hz, *J*<sub>2</sub> = 1.6 Hz, CH<sub>2</sub>), 2.80 (s, 6H, Me<sub>IndPh</sub>), 2.08 (s, 12H, Me<sub>Ar</sub>), 1.56 (d, 6H, *J* = 6.6 Hz, iPrMe), 1.23 (d, 9H, *J* = 11.6 Hz, tBuP), 1.16 (d, 6H, *J* = 6.6 Hz, iPrMe), 0.73 (dt, 9H, *J* = 17.7 Hz, 7.7 Hz, TEPO-CH<sub>3</sub>). Note: the TEPO CH<sub>2</sub> overlaps with the tBu-Me and one of the iPr-Me resonances, which is supported by the broad base of those resonances and integration. <sup>13</sup>C{<sup>1</sup>H} NMR (100.62 MHz, THF-*d*<sub>8</sub>) δ ppm 157.8 (d, *J* = 21.9, N-Ar<sub>ipso</sub>), 137.4 (*m*-CMe), 128.5 (C-Me<sub>IndCp</sub>), 127.7 (C<sub>Bridge</sub>), 123.6 (C-H<sub>IndPh</sub>), 122.1 (C-iPr<sub>IndCp</sub>), 114.8 (*p*-CH), 114.5 (d, *J* = 2.7 Hz, C-H<sub>IndCp</sub>), 110.4 (*o*-CH), 47.8 (d, *J* = 7.2 Hz, CH<sub>2</sub>), 29.2 (iPr-CH<sub>3</sub>), 28.7 (iPr-CH<sub>3</sub>), 28.5 (d, *J* = 5.8 Hz, tBu-C), 28.0 (d, *J* = 9.5 Hz, tBu-Me), 23.1 (Me-<sub>IndPh</sub>), 22.8 (iPr-CH), 21.4 (Me<sub>Ar</sub>), 17.7 (d, *J* = 66.2 Hz, TEPO-CH<sub>2</sub>), 4.6 (d, *J* = 4.4 Hz, TEPO-CH<sub>3</sub>).



$^{31}\text{P}\{^1\text{H}\}$  NMR (161.98 MHz, THF-*d*<sub>8</sub>, Room Temp.)  $\delta$  ppm 68.8 (s, TEPO-P), -13.7 (s, BiAMP).  $^{31}\text{P}\{^1\text{H}\}$  NMR (161.98 MHz, THF-*d*<sub>8</sub>, -50 °C)  $\delta$  ppm 70.3 (*d*,  $J = 3.2$  Hz, TEPO), -14.9 (*d*,  $J = 2.7$  Hz, BiAMP)

In an inert atmosphere Argon filled glovebox, Lu(<sup>Ar</sup>BiAMP<sup>Bu</sup>)( $\eta^5$ -iPrMeInd)(thf) (**6**, 21.0 mg, 0.025 mmol) was added to an oven-dried *J*-Young NMR tube and dissolved in approximately 0.750 g of THF-*d*<sub>8</sub>. To this solution, triethylphosphine oxide (3.4 mg, 1.0 equiv.) was added at rt. The reaction was sealed. The reaction remained homogenous and nearly colorless. The reaction mixture was then analyzed by NMR spectroscopy. **NMR analysis of 9:**  $^1\text{H}$  NMR (400.13 MHz, THF-*d*<sub>8</sub>)  $\delta$  ppm 6.93 (d, 1H,  $J = 3.6$  Hz, C-H<sub>IndCp</sub>), 6.47 (s, 2H, C-H<sub>IndPh</sub>), 5.92 (s, 2H, *p*-CH), 5.84 (s, 4H, *o*-CH), 3.71 (sep, 2H,  $J = 6.6$  Hz, iPrC-H), 3.39 (dd, 2H,  $J_1 = 11.6$  Hz,  $J_2 = 7.6$  Hz, CH<sub>2</sub>), 3.11 (d, 2H,  $J = 12.0$  Hz, CH<sub>2</sub>), 2.80 (s, 6H, Me<sub>IndPh</sub>), 2.10 (s, 12H, Me<sub>Ar</sub>), 1.47 (d, 6H,  $J = 6.6$  Hz, iPrMe), 1.24 (d, 9H,  $J = 12.0$  Hz, tBuP), 1.17 (td, 6H,  $J = 13.1$  Hz, 7.7 Hz, TEPO-CH<sub>2</sub>), 1.08 (d, 6H,  $J = 6.6$  Hz, iPrMe), 0.70 (dt, 9H,  $J = 17.7$  Hz, 7.7 Hz, TEPO-CH<sub>3</sub>).  $^{13}\text{C}\{^1\text{H}\}$  NMR (100.62 MHz, THF-*d*<sub>8</sub>)  $\delta$  ppm 159.7 (d,  $J = 21.9$ , N-Ar<sub>ipso</sub>), 137.5 (*m*-CMe), 129.9 (C-Me<sub>IndCp</sub>), 126.8 (C<sub>Bridge</sub>), 123.0 (C-H<sub>IndPh</sub>), 120.7 (C-iPr<sub>IndCp</sub>), 116.2 (*p*-CH), 115.5 (d,  $J = 4.4$  Hz, C-H<sub>IndCp</sub>), 112.9 (*o*-CH), 49.3 (d,  $J = 6.5$  Hz, CH<sub>2</sub>), 29.5 (iPr-CH<sub>3</sub>), 29.0 (d,  $J = 1.8$  Hz, iPr-CH<sub>3</sub>), 28.9 (d,  $J = 7.1$  Hz, tBu-C), 28.3 (d,  $J = 9.8$  Hz, tBu-Me), 23.2-23.0, (m, Me-<sub>IndPh</sub>, iPr-CH), 22.0 (Me<sub>Ar</sub>), 18.1 (d,  $J = 66.2$  Hz, TEPO-CH<sub>2</sub>), 5.3 (d,  $J = 4.4$  Hz, TEPO-CH<sub>3</sub>).  $^{31}\text{P}\{^1\text{H}\}$  NMR (161.98 MHz, THF-*d*<sub>8</sub>)  $\delta$  ppm 72.6 (d,  $J = 3.2$  Hz, TEPO), -17.2 (d,  $J = 2.9$  Hz, BiAMP).

The collected NMR spectra for the in-situ generated TEPO adducts **7**, **8** and **9** are shown on pages S24 through S29.

### 1.3. Proposed Electronic Effects of M-P Bond

Given the small *J*-value observed for the P-Y interaction, and the nature of the REEs as hard, electropositive metals, we hypothesize that the *J*-value depends mainly on the electron rich/deficient nature of the metal. As the ligand coordination sphere of the metal becomes increasingly electron donating, the electrostatic interaction between the phosphorus lone pair and the metal center will decrease, inducing a decrease in the *J* value.

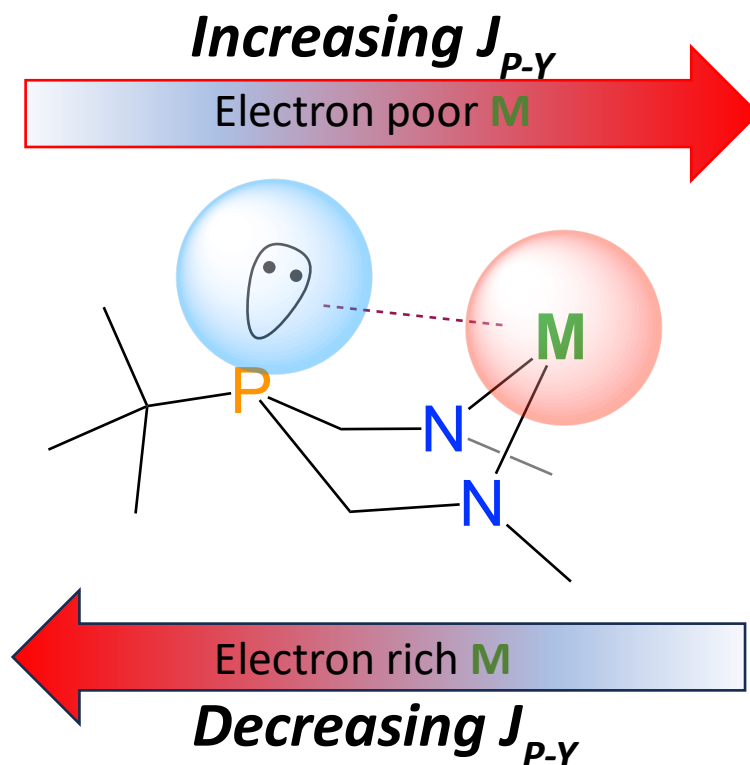

**Figure S1.** Proposed effect of metal coordination sphere on the M-Y interaction; the more electron rich metal centers will poorly interact with the lone-pair of the phosphorus, while the more electron poor metal centers will display an increased M-P interaction.

## 2. Supplementary Data and Experimental Details

### 2.1. NMR spectra

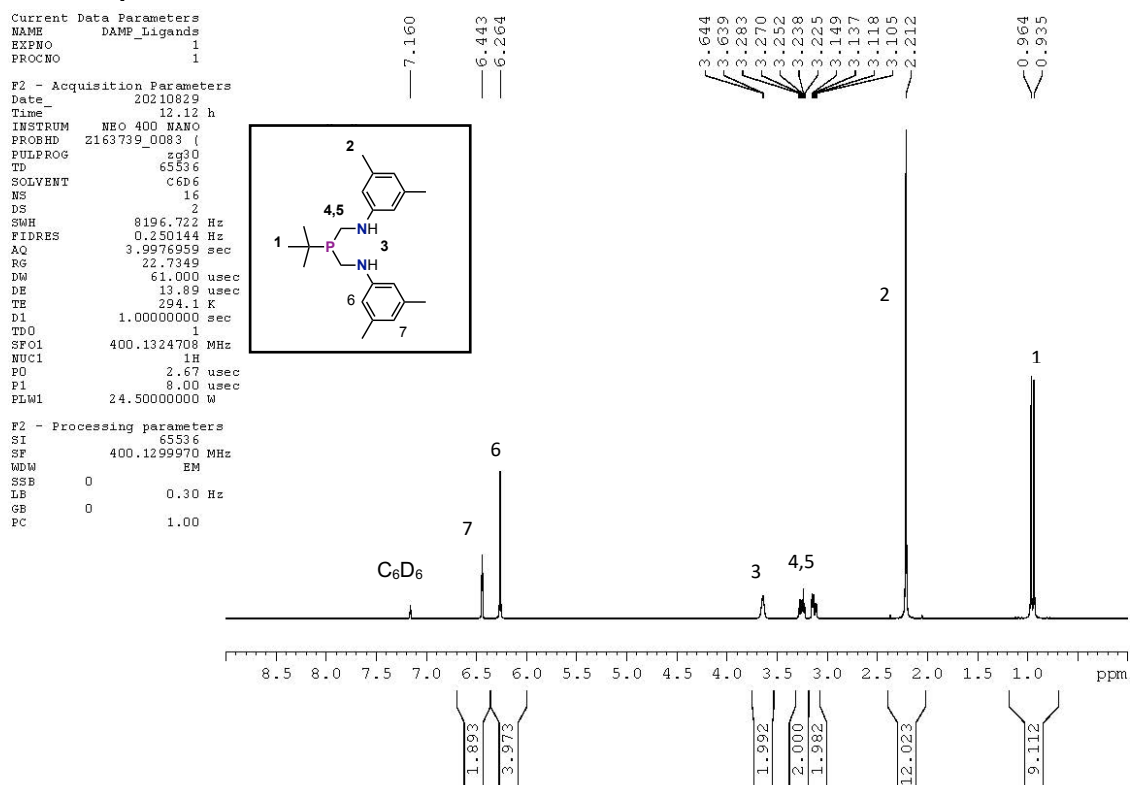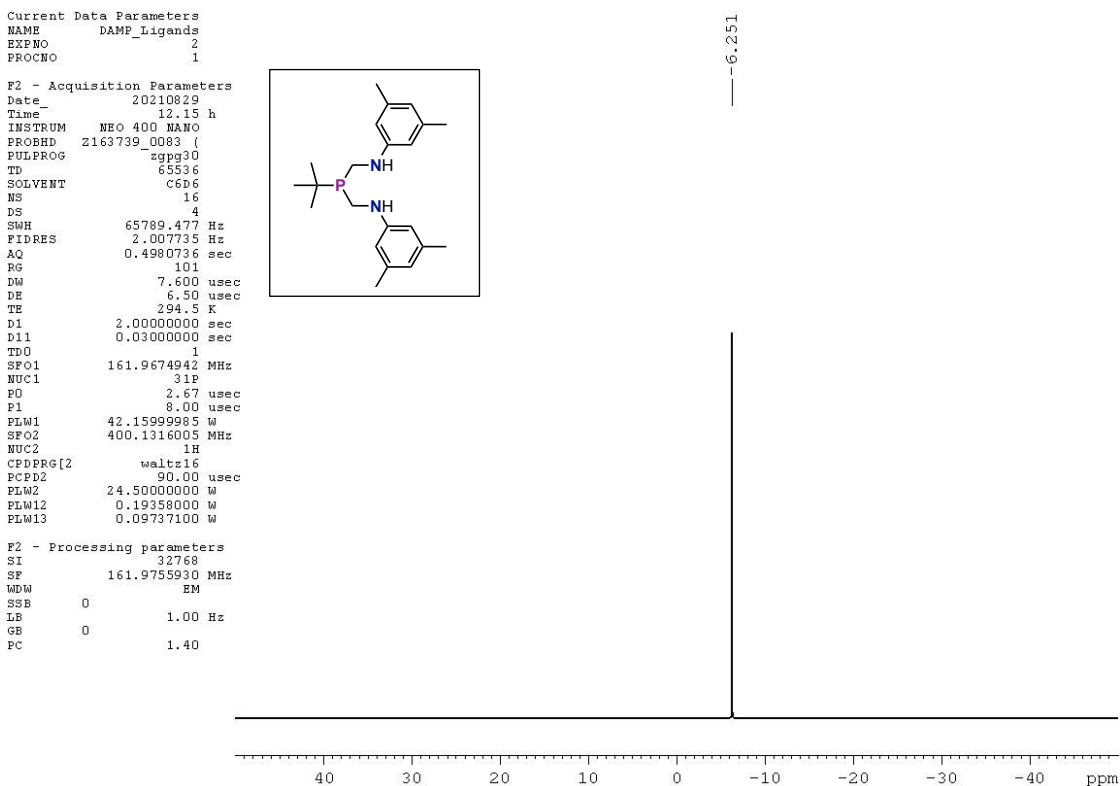

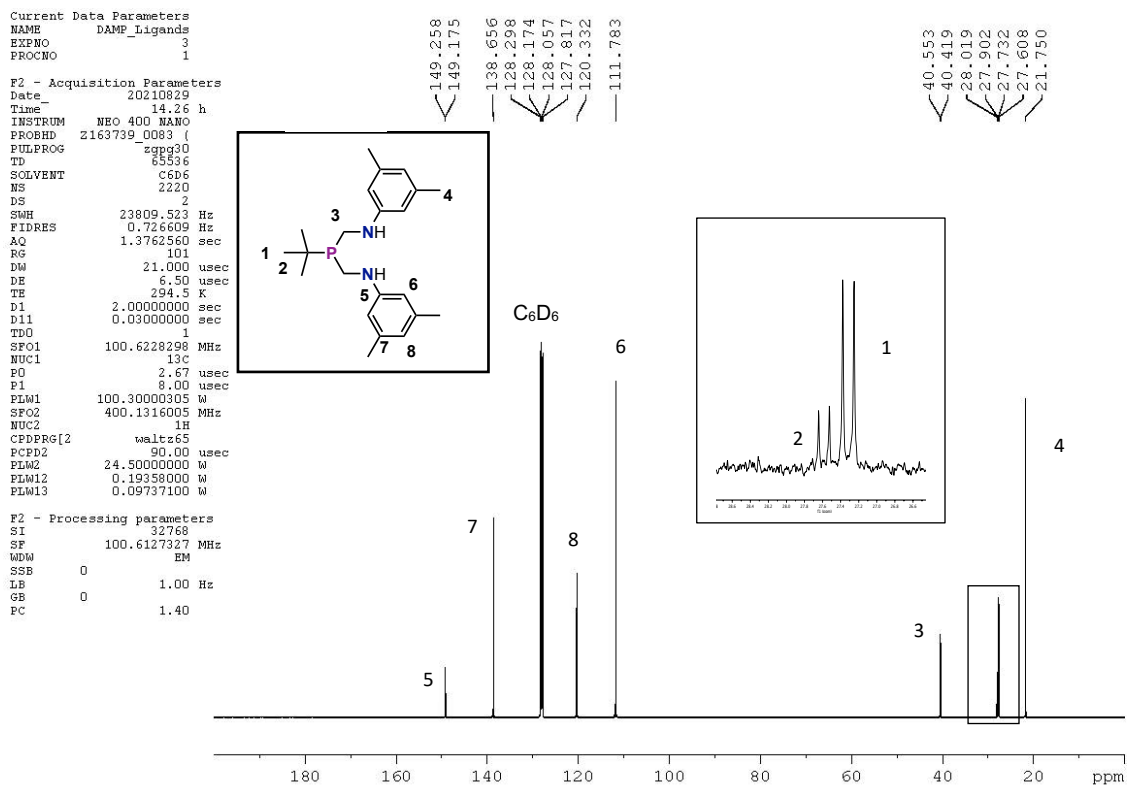

Figure S4.  $^{13}\text{C}\{^1\text{H}\}$  NMR spectrum of  $^{\text{Ar}}\text{BiAMP}^{\text{tBu}}$  acquired in  $\text{C}_6\text{D}_6$  at room temperature with an expansion of the 26ppm to 29 ppm region to show the doublet resonances attributed to the tBu-carbon atoms of the phosphine.

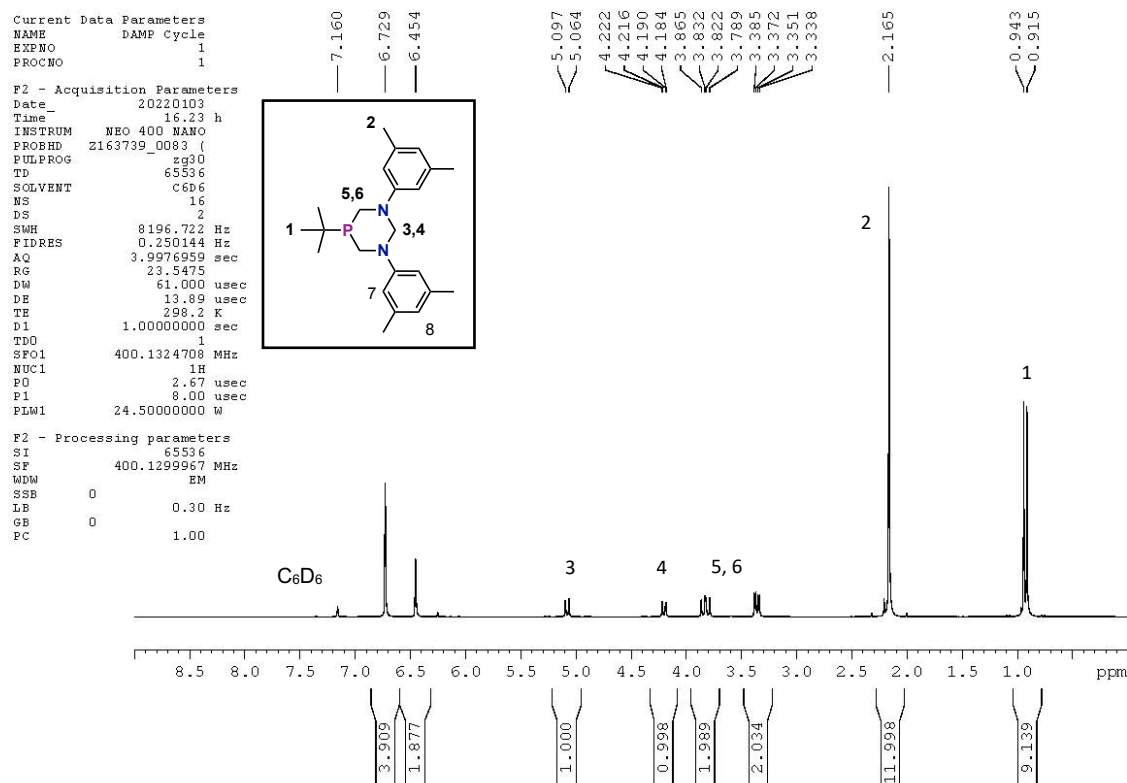

Figure S5.  $^1\text{H}$  NMR spectrum of  $(^{\text{Ar}}\text{BiAMP}^{\text{tBu}})\text{CH}_2$  acquired in  $\text{C}_6\text{D}_6$  at room temperature.

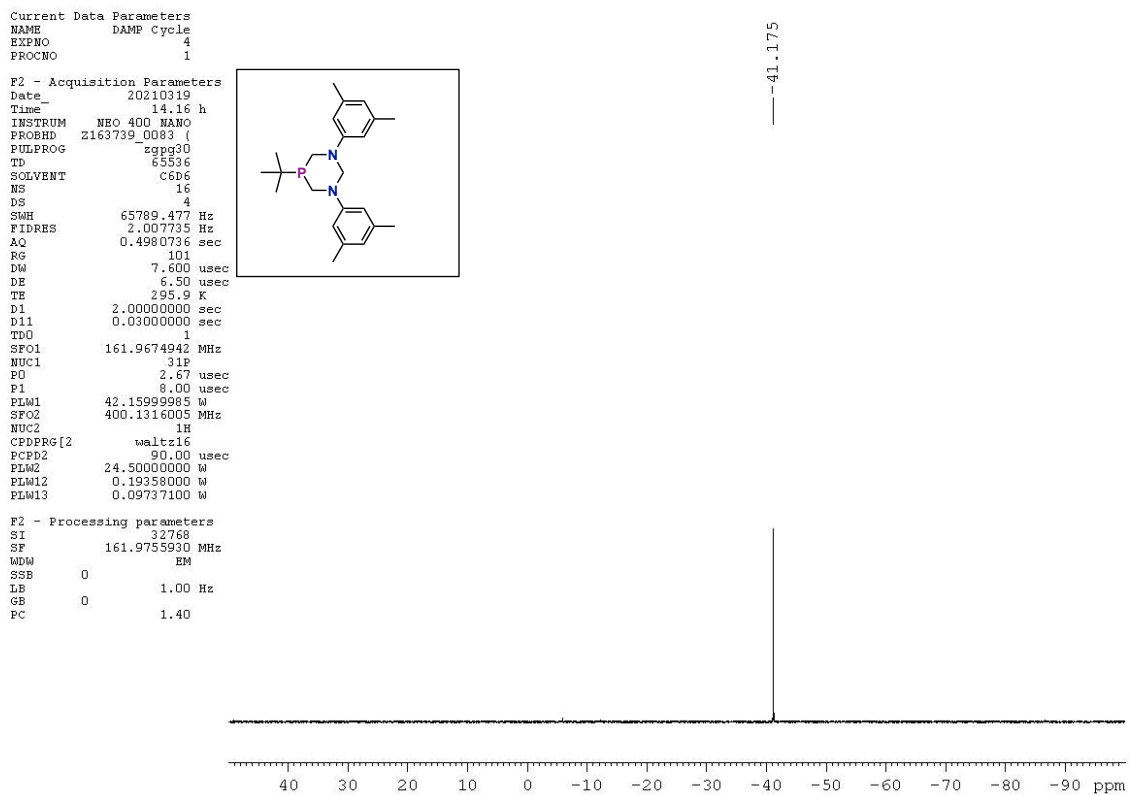

Figure S6.  $^{31}\text{P}\{^1\text{H}\}$  NMR spectrum of  $(^{\text{Ar}}\text{BiAMP}^{\text{tBu}})\text{CH}_2$  acquired in  $\text{C}_6\text{D}_6$  at room temperature.

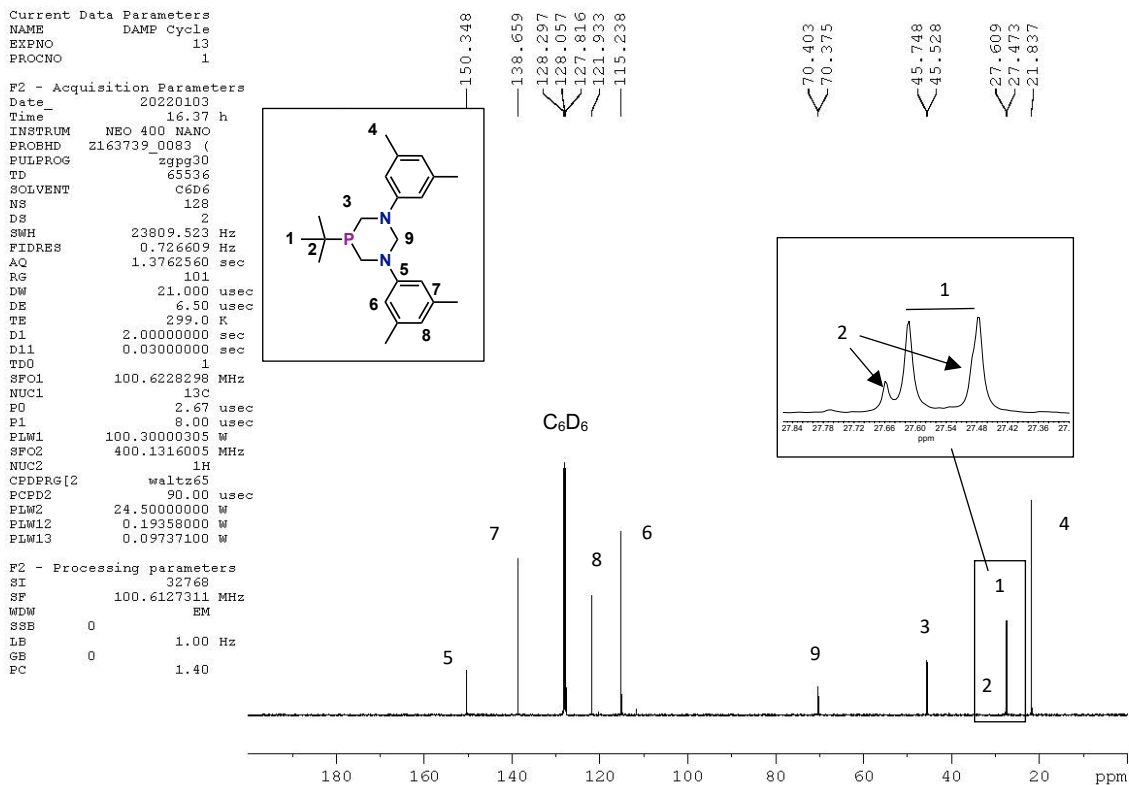

Figure S7.  $^{13}\text{C}\{^1\text{H}\}$  NMR spectrum of  $(^{\text{Ar}}\text{BiAMP}^{\text{tBu}})\text{CH}_2$  acquired in  $\text{C}_6\text{D}_6$  at room temperature. An expansion is provided to show the  $4^\circ$  carbon of the tert-butyl group; it is partially overlapping with the tBu-methyl peaks, and only one peak of the expected doublet is observed while the other appears as a shoulder of the tBu-methyl resonance.

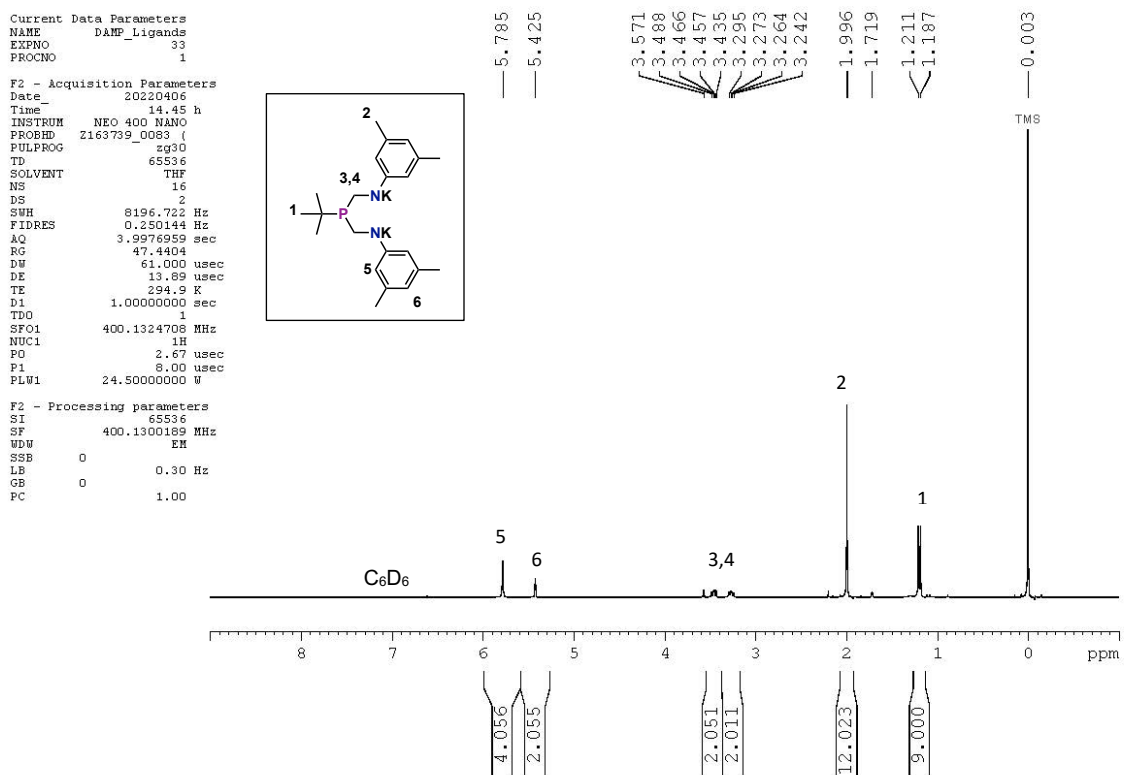

Figure S8.  $^1\text{H}$  NMR spectrum of a freshly prepared  $(^{\text{Ar}}\text{BiAMP}^{\text{tBu}})_2\text{K}_2$  acquired in  $\text{THF-d}_8$  at room temperature.

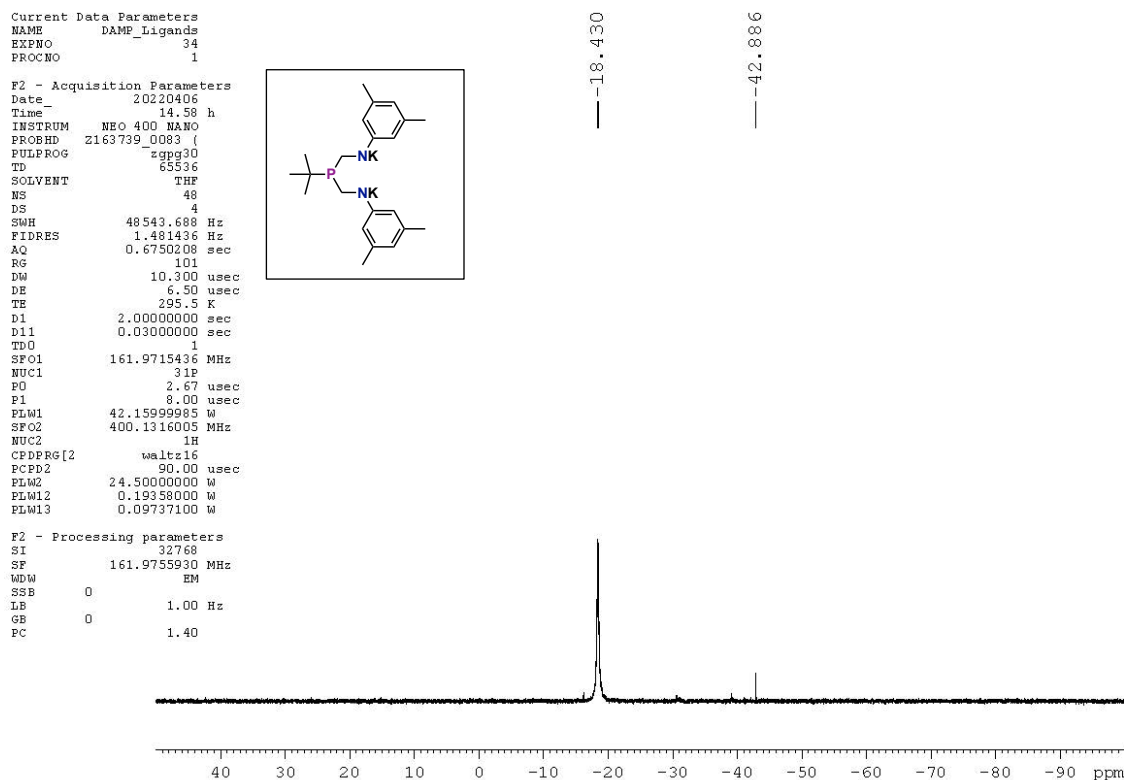

Figure S9.  $^{31}\text{P}\{^1\text{H}\}$  NMR spectrum of a freshly prepared  $(^{\text{Ar}}\text{BiAMP}^{\text{tBu}})_2\text{K}_2$  acquired in  $\text{THF-d}_8$  at room temperature.

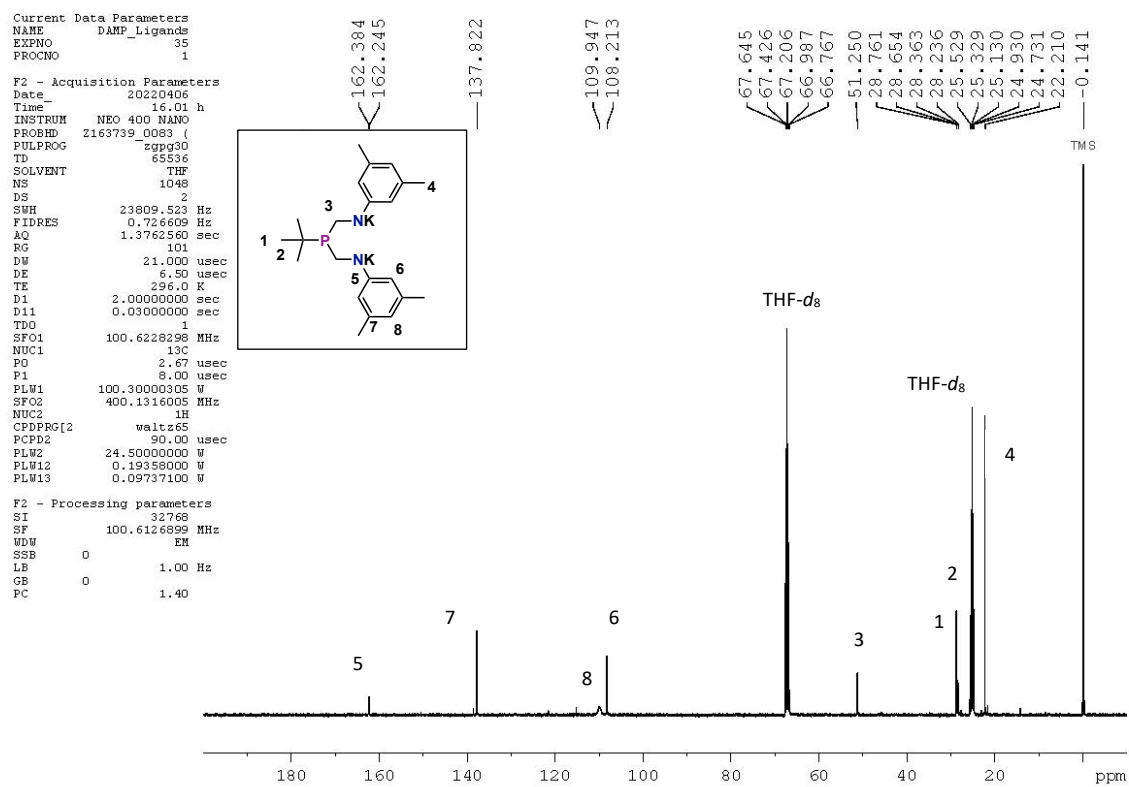

Figure S10.  $^{13}C\{^1H\}$  NMR spectrum of a freshly prepared  $(ArBiAMP^{tBu})K_2$  acquired in  $THF-d_8$  at room temperature.

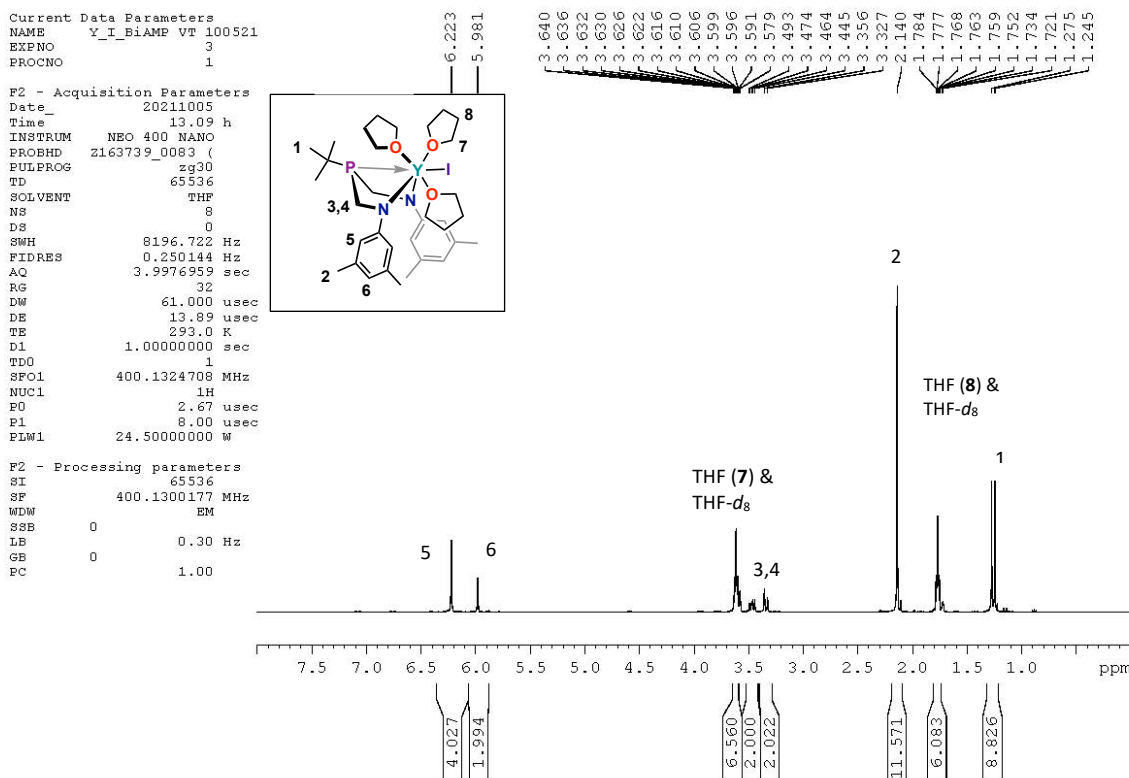

Figure S11.  $^1H$  NMR spectrum of  $YI(ArBiAMP^{tBu})(THF)_3$  (1) recrystallized from  $THF$ :pentane acquired in  $THF-d_8$  at room temperature.

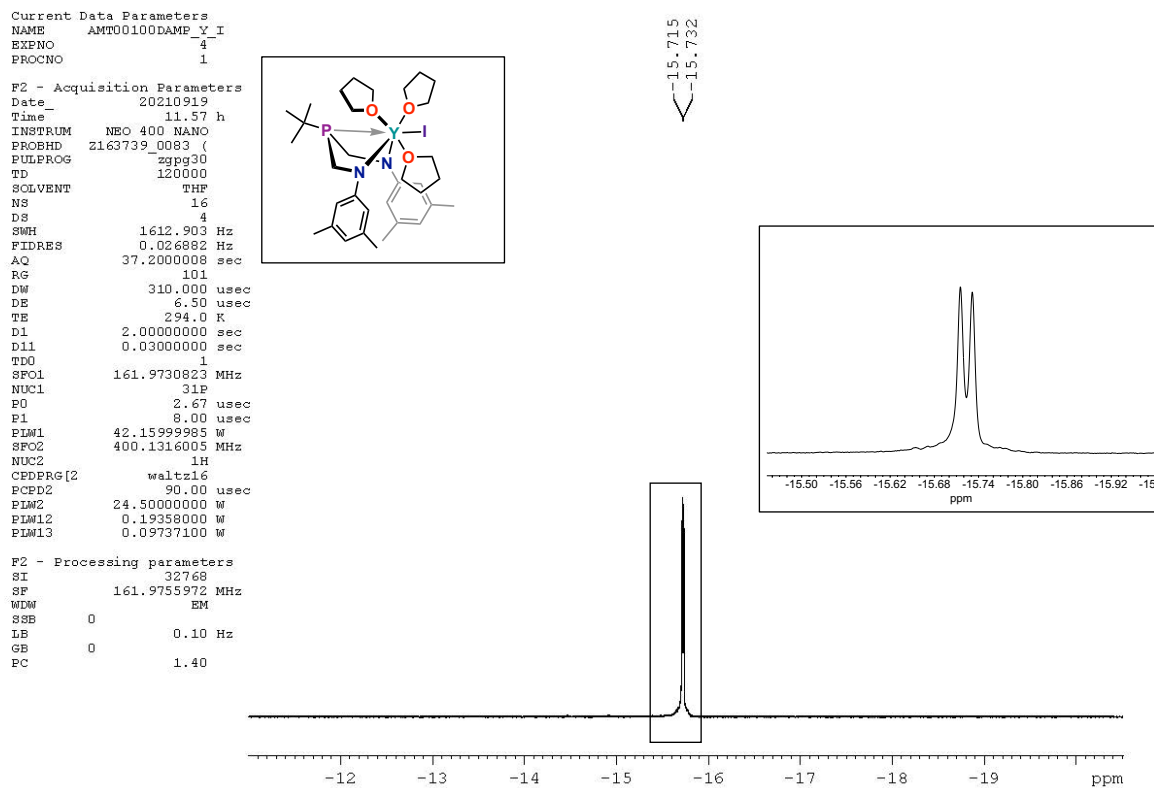

Figure S12.  $^{31}P\{^1H\}$  NMR spectrum of  $Yl(ArBiAMP^{tBu})(THF)_3$  (1) recrystallized from THF:pentane acquired in THF- $d_8$  at room temperature.

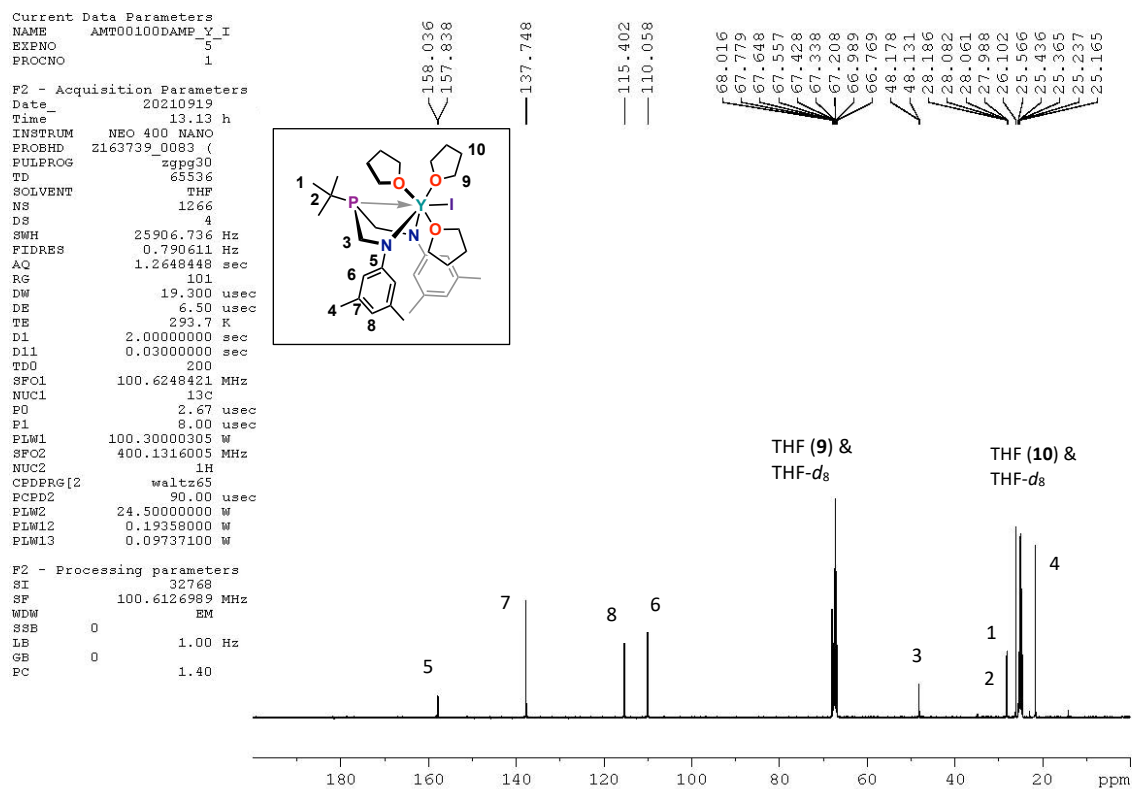

Figure S13.  $^{13}C\{^1H\}$  NMR spectrum of  $Yl(ArBiAMP^{tBu})(THF)_3$  (1) recrystallized from THF:pentane acquired in THF- $d_8$  at room temperature.

```

Current Data Parameters
NAME      AMT00100DAMP_Y_I
EXPNO    20
PROCNO   1

F2 - Acquisition Parameters
Date_    20210930
Time     13.14 h
INSTRUM  NEO 400 NANO
PROBHD   Z163739_0083 (
PULPROG  zgig
TD       65536
SOLVENT  THF
NS       1280
DS       0
SWH      10000.000 Hz
FIDRES   0.305176 Hz
AQ       3.2767999 sec
RG       101
DM       50.000 usec
DE       6.50 usec
TE       298.1 K
D1       10.00000000 sec
D11      0.03000000 sec
TD0      80
SFO1     19.6150049 MHz
NUC1     89Y
P1       25.00 usec
ELW1     91.43900299 W
SFO2     400.1300000 MHz
NUC2     1H
CPDPRG2  waltz65
PCPD2    90.00 usec
ELW2     24.50000000 W
PLW12    0.19358000 W

F2 - Processing parameters
SI       262144
SF       19.6073623 MHz
WDW      EM
SSB      0
LB       0.50 Hz
GB       0
PC       1.00
    
```

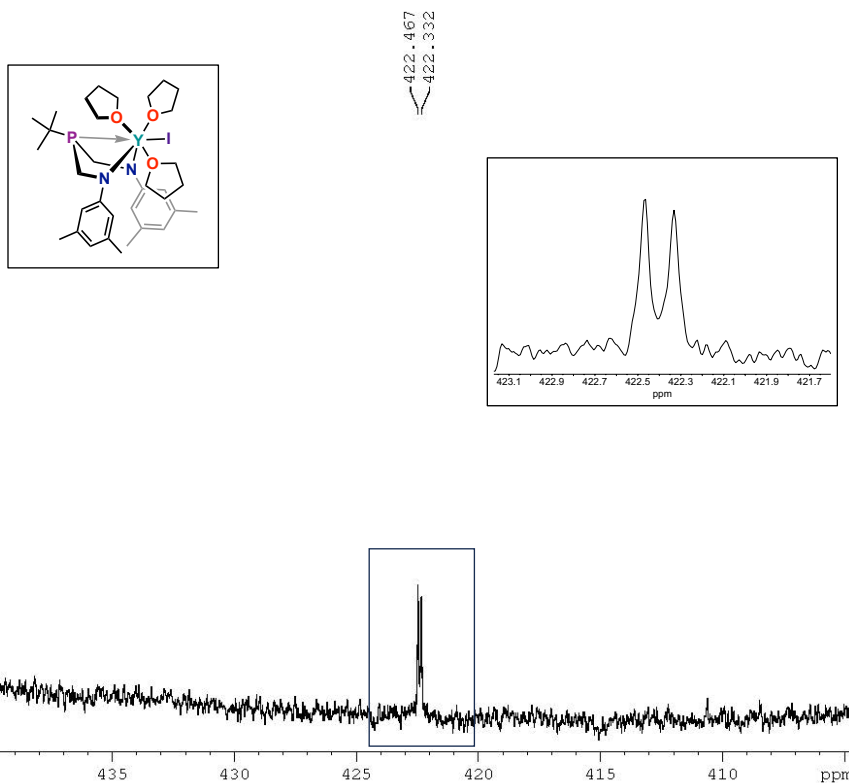

Figure S14.  $^{89}\text{Y}\{^1\text{H}\}$  NMR spectrum of  $\text{Yl}(\text{}^{\text{A}}\text{rBiAMP}^{\text{tBu}})(\text{THF})_3$  (1) recrystallized from THF:pentane acquired in THF- $d_8$  at room temperature.

```

Current Data Parameters
NAME      AMT00100DAMP_La_I
EXPNO    1
PROCNO   1

F2 - Acquisition Parameters
Date_    20211001
Time     7.32 h
INSTRUM  NEO 400 NANO
PROBHD   Z163739_0083 (
PULPROG  zg30
TD       65536
SOLVENT  THF
NS       16
DS       2
SWH      8196.722 Hz
FIDRES   0.250144 Hz
AQ       3.9976959 sec
RG       54.0541
DM       61.000 usec
DE       13.89 usec
TE       298.2 K
D1       1.00000000 sec
TD0      1
SFO1     400.1324708 MHz
NUC1     1H
P0       2.67 usec
P1       8.00 usec
PLW1     24.50000000 W

F2 - Processing parameters
SI       65536
SF       400.1300182 MHz
WDW      EM
SSB      0
LB       0.20 Hz
GB       0
PC       1.00
    
```

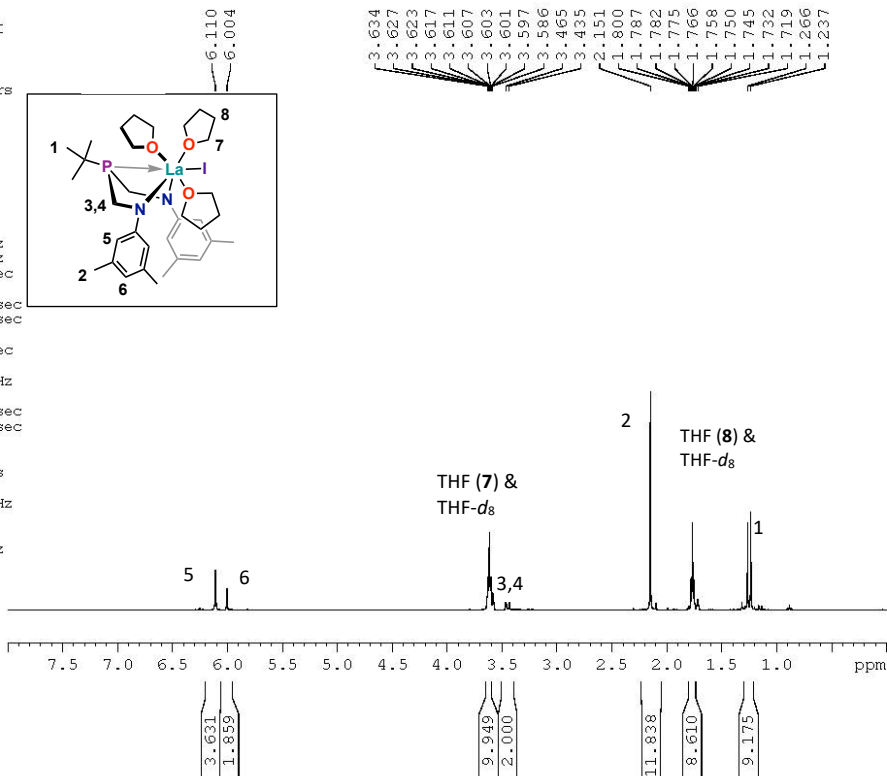

Figure S15.  $^1\text{H}$  NMR spectrum of  $\text{LaI}(\text{}^{\text{A}}\text{rBiAMP}^{\text{tBu}})(\text{THF})_3$  (2) recrystallized from THF:pentane acquired in THF- $d_8$  at room temperature.



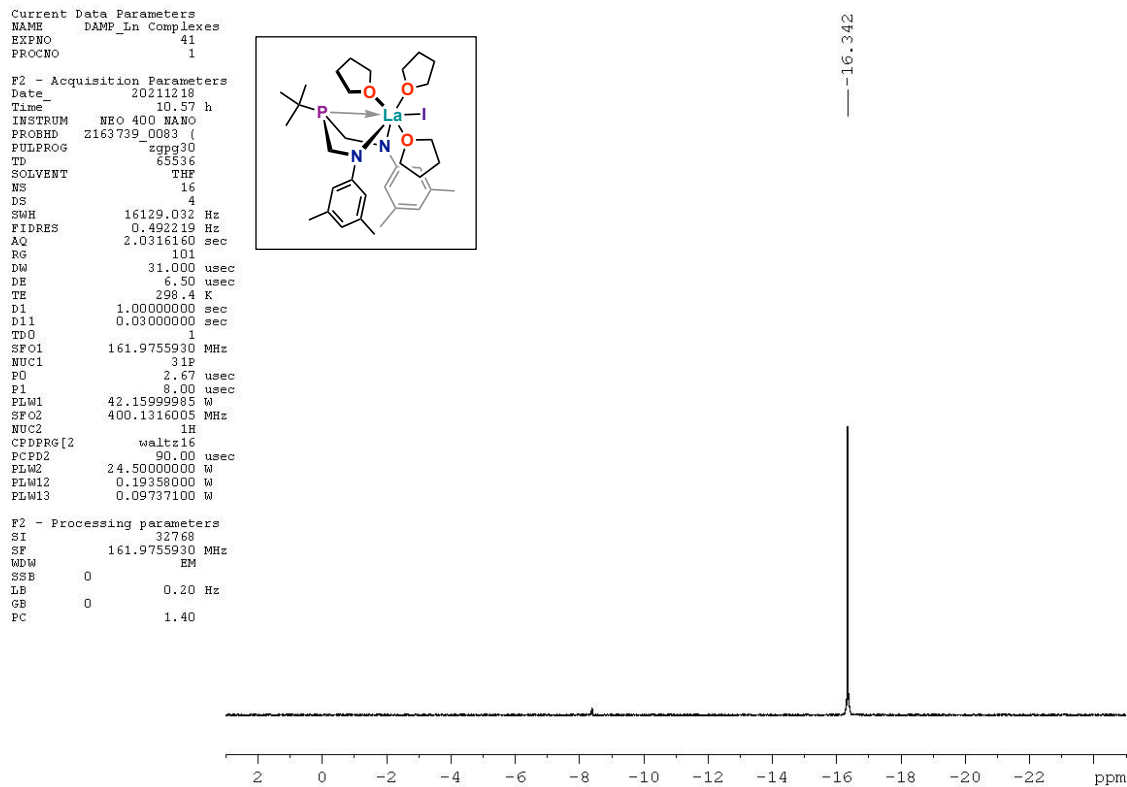

Figure S16.  $^{31}\text{P}\{^1\text{H}\}$  NMR spectrum of  $\text{LaI}(\text{ArBiAMP}^{\text{tBu}})(\text{THF})_3$  (2) recrystallized from THF:pentane acquired in  $\text{THF-d}_8$  at room temperature.

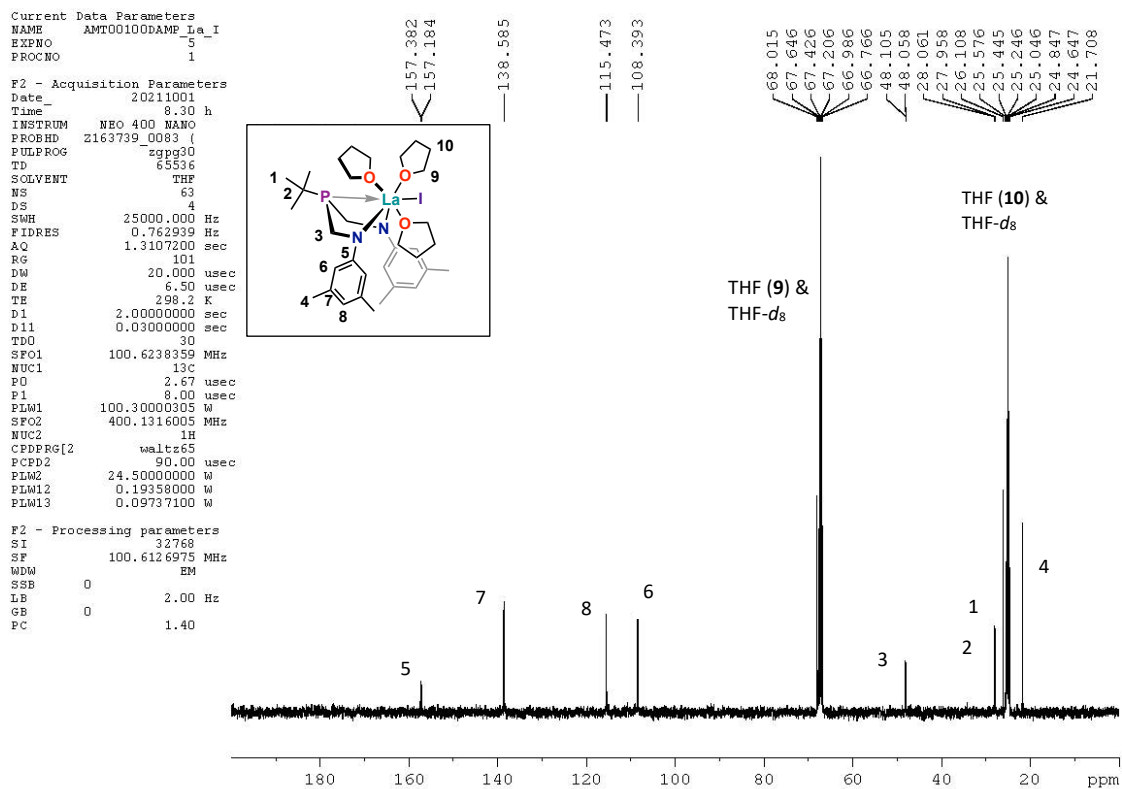

Figure S17.  $^{13}\text{C}\{^1\text{H}\}$  NMR spectrum of  $\text{LaI}(\text{ArBiAMP}^{\text{tBu}})(\text{THF})_3$  (2) recrystallized from THF:pentane acquired in  $\text{THF-d}_8$  at room temperature.

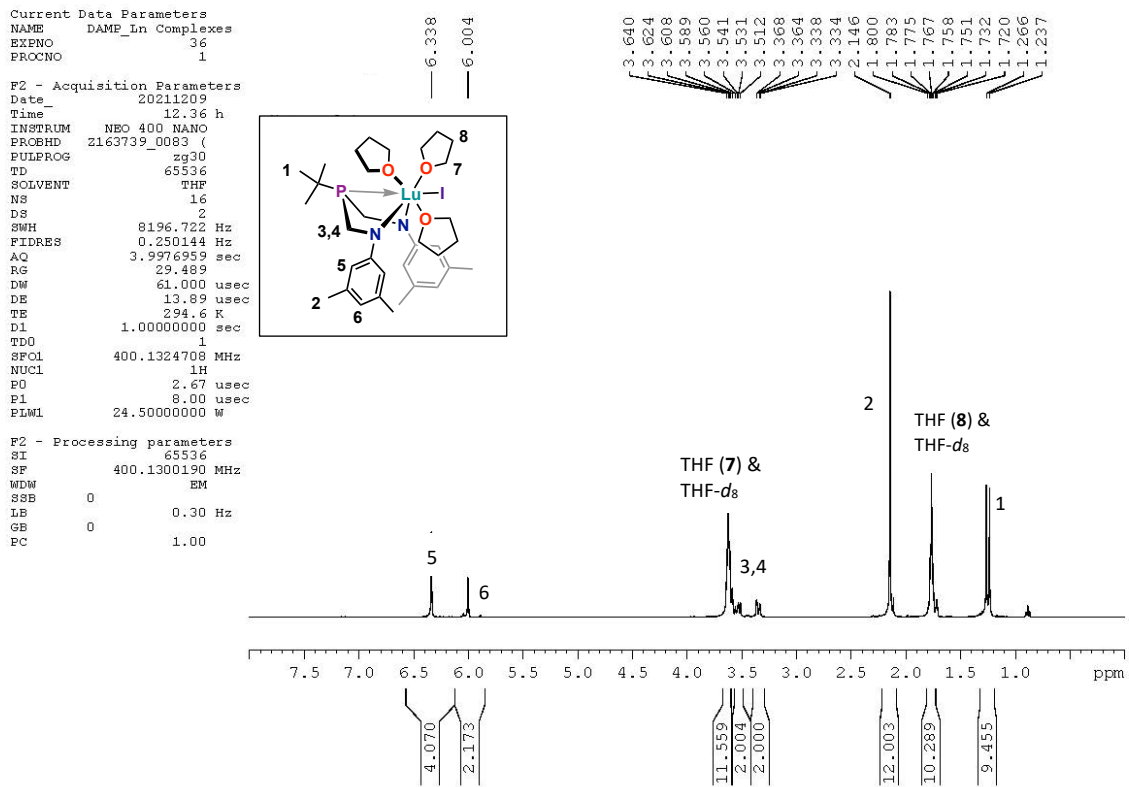

Figure S18.  $^1\text{H}$  NMR spectrum of  $\text{Lu}(\text{}^4r\text{-BiAMP}^{8u})(\text{THF})_3$  (**3**) recrystallized from THF:pentane acquired in  $\text{THF-d}_8$  at room temperature.

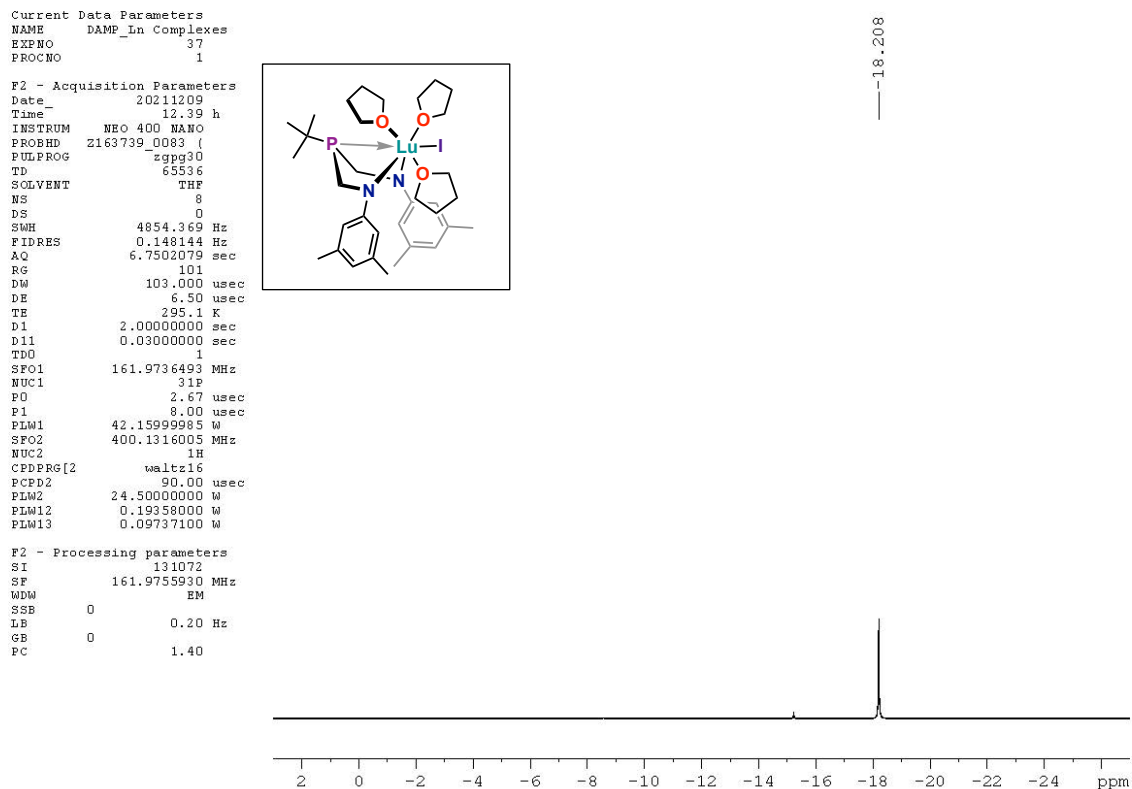

Figure S19.  $^{31}\text{P}\{^1\text{H}\}$  NMR spectrum of  $\text{Lu}(\text{}^4r\text{-BiAMP}^{8u})(\text{THF})_3$  (**3**) recrystallized from THF:pentane acquired in  $\text{THF-d}_8$  at room temperature.

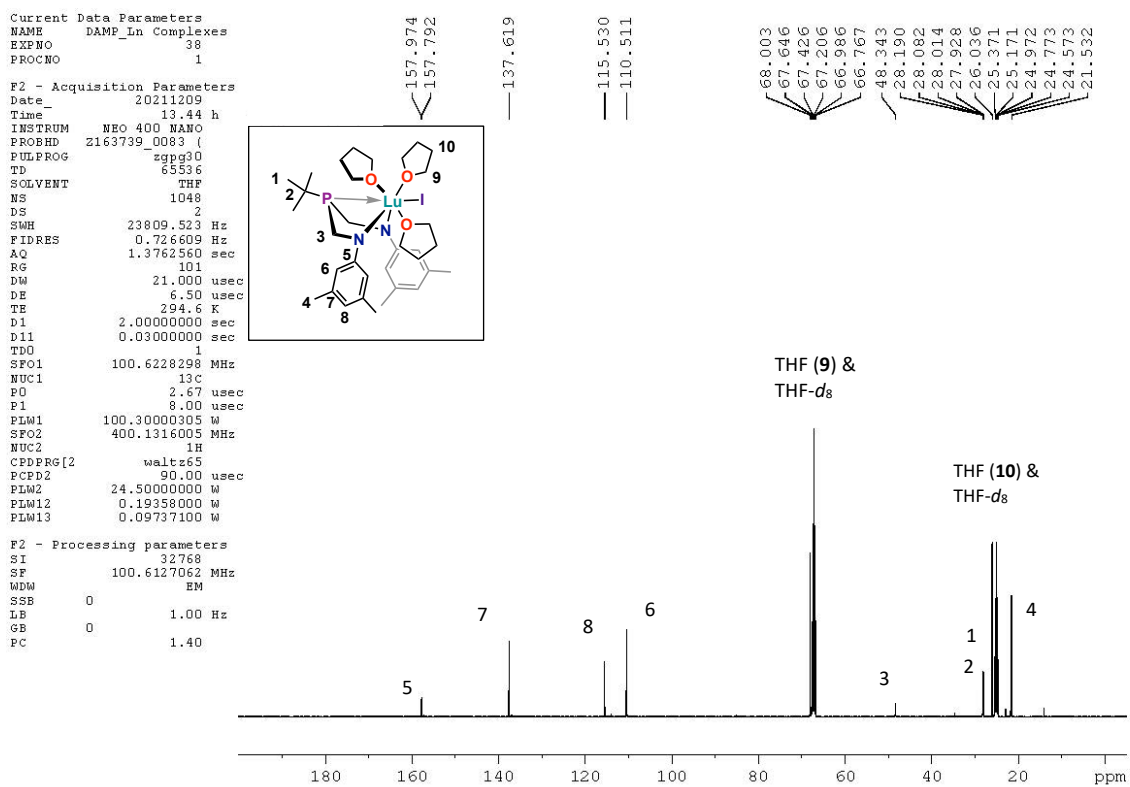

Figure S20.  $^{13}\text{C}\{^1\text{H}\}$  NMR spectrum of  $\text{Lu}(\eta^5\text{-}(1,3\text{-diisopropyl-4,7-dimethylindenyl}))(\text{THF})_3$  (3) recrystallized from THF:pentane acquired in THF- $d_8$  at room temperature.

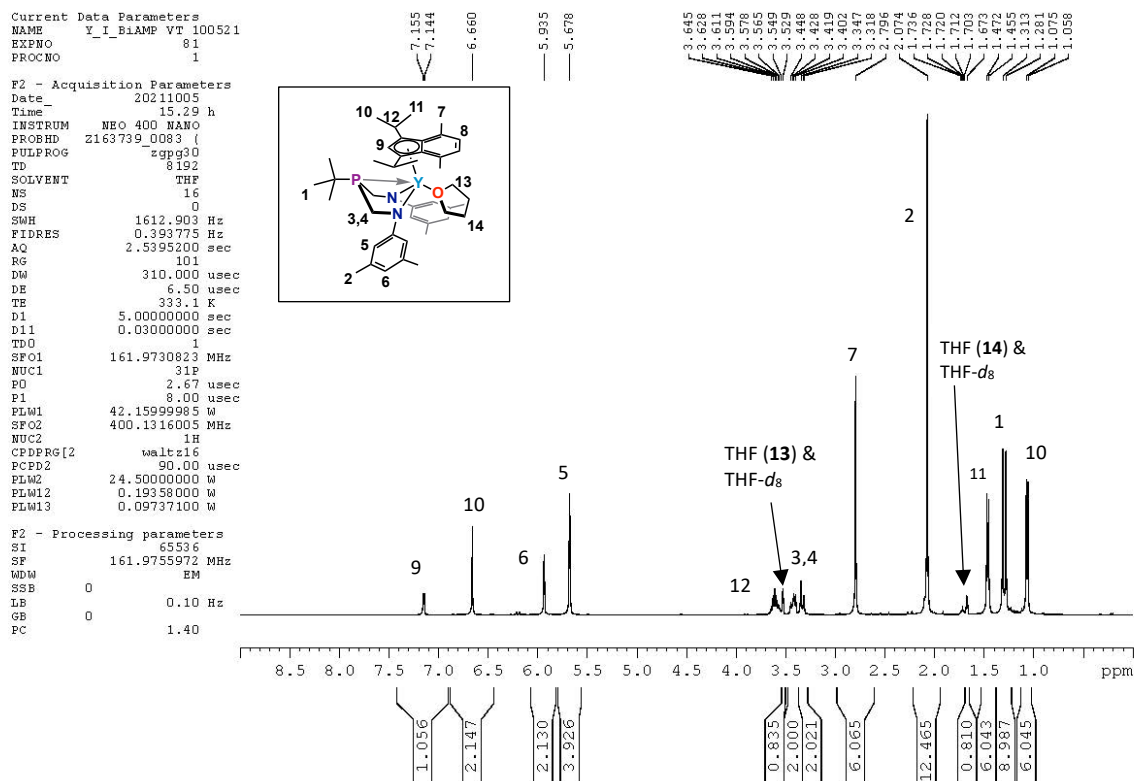

Figure S21.  $^1\text{H}$  NMR spectrum of  $\text{Y}(\eta^5\text{-}(1,3\text{-diisopropyl-4,7-dimethylindenyl}))(\text{ArBiAMP}^{\text{Bu}})(\text{THF})$  (4) recrystallized from THF:pentane acquired in THF- $d_8$  at room temperature.



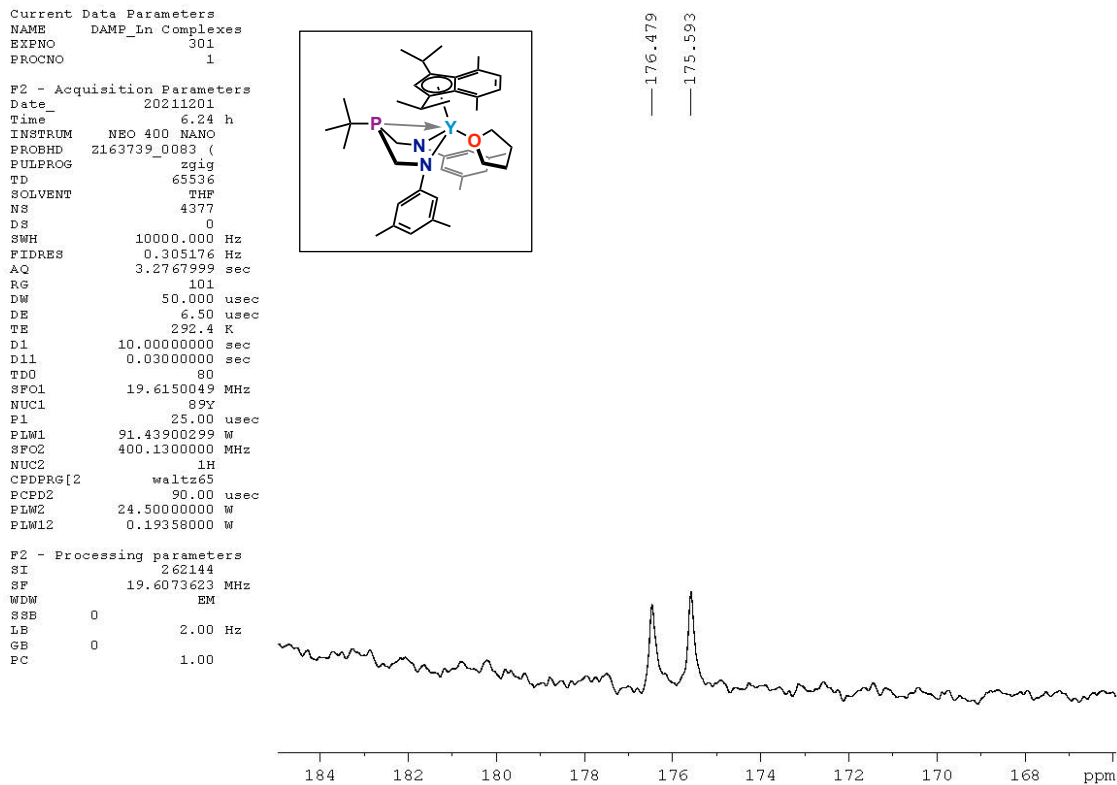

Figure S24.  $^{89}\text{Y}\{^1\text{H}\}$  NMR spectrum of  $\text{Y}(\eta^5\text{-}(1,3\text{-diisopropyl-4,7-dimethylindenyl})(\text{ArBiAMP}^{\text{Bu}})(\text{THF})$  (4) recrystallized from THF:pentane in acquired in THF- $d_6$  at room temperature.

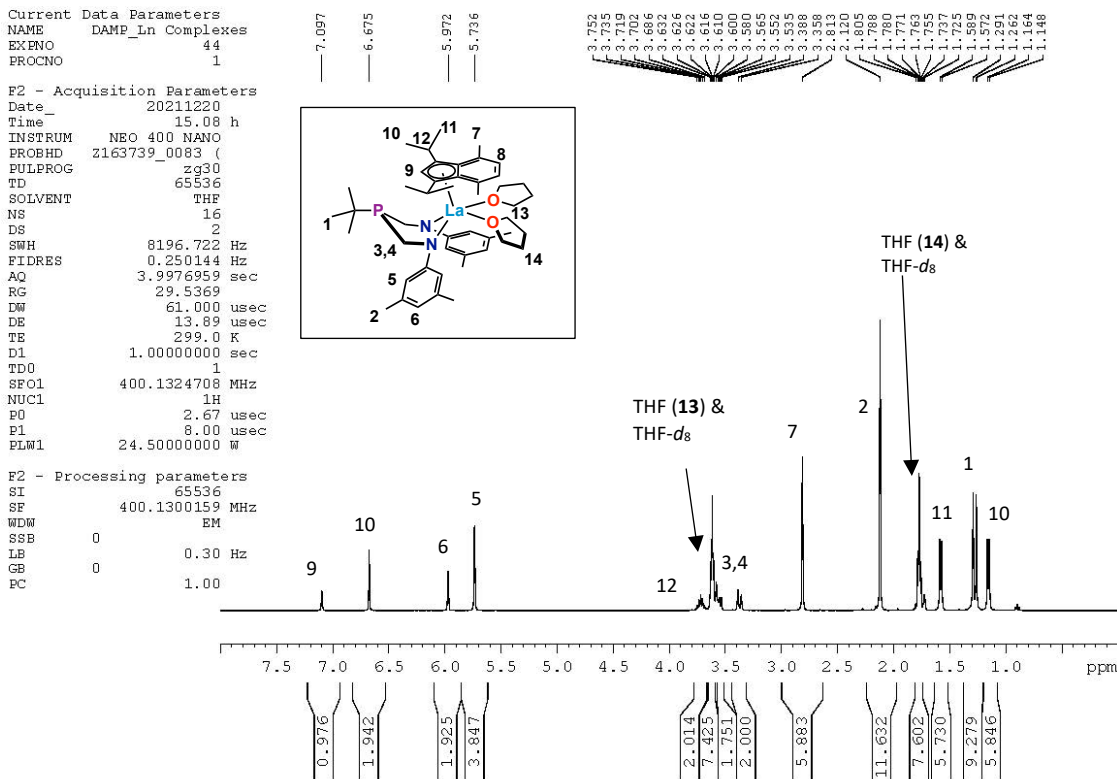

Figure S25.  $^1\text{H}$  NMR spectrum of  $\text{La}(\eta^5\text{-}(1,3\text{-diisopropyl-4,7-dimethylindenyl})(\text{ArBiAMP}^{\text{Bu}})(\text{THF})_2$  (5) recrystallized from THF:pentane in acquired in THF- $d_6$  at room temperature.

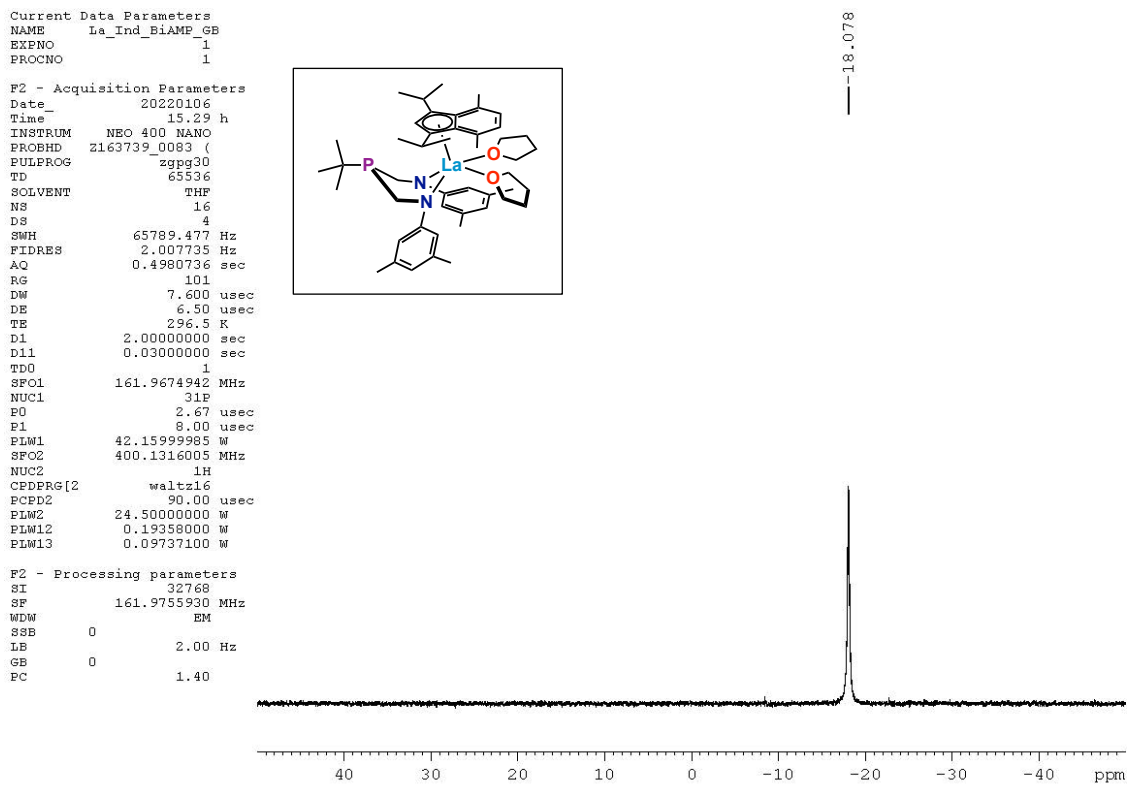

Figure S26.  $^{31}\text{P}\{^1\text{H}\}$  NMR spectrum of  $\text{La}(\eta^5\text{-}(1,3\text{-diisopropyl-4,7-dimethylindenyl}))(\text{ArBiAMP}^{\text{TBu}})(\text{THF})_2$  (5) recrystallized from THF:pentane acquired in  $\text{THF-d}_3$  at room temperature.

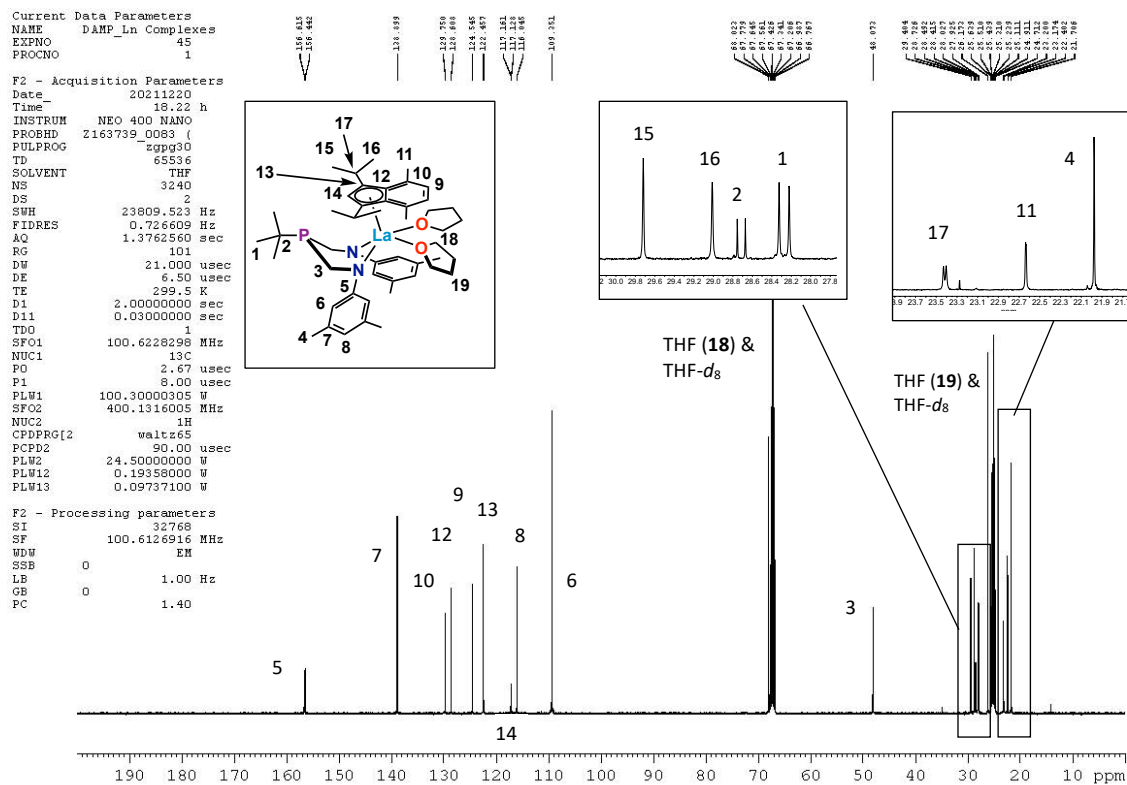

Figure S27.  $^{13}\text{C}\{^1\text{H}\}$  NMR spectrum of  $\text{La}(\eta^5\text{-}(1,3\text{-diisopropyl-4,7-dimethylindenyl}))(\text{ArBiAMP}^{\text{TBu}})(\text{THF})_2$  (5) recrystallized from THF:pentane acquired in  $\text{THF-d}_3$  at room temperature. Expansions are provided for two aliphatic regions to assist with visualization of the assigned resonances.

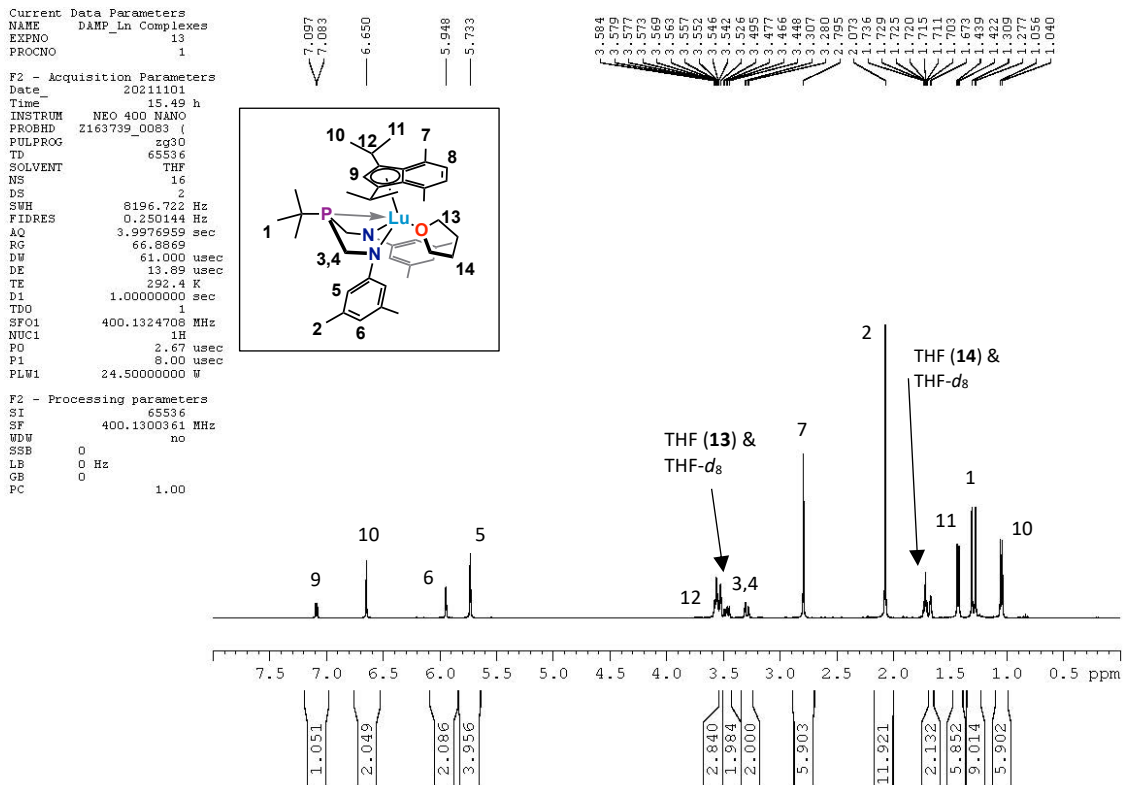

Figure S28.  $^1\text{H}$  NMR spectrum of  $\text{Lu}(\eta^5\text{-}(1,3\text{-diisopropyl-4,7-dimethylindenyl})(\text{ArBiAMP}^{\text{Bu}})(\text{THF})$  (6) recrystallized from THF:pentane acquired in THF- $d_8$  at room temperature.

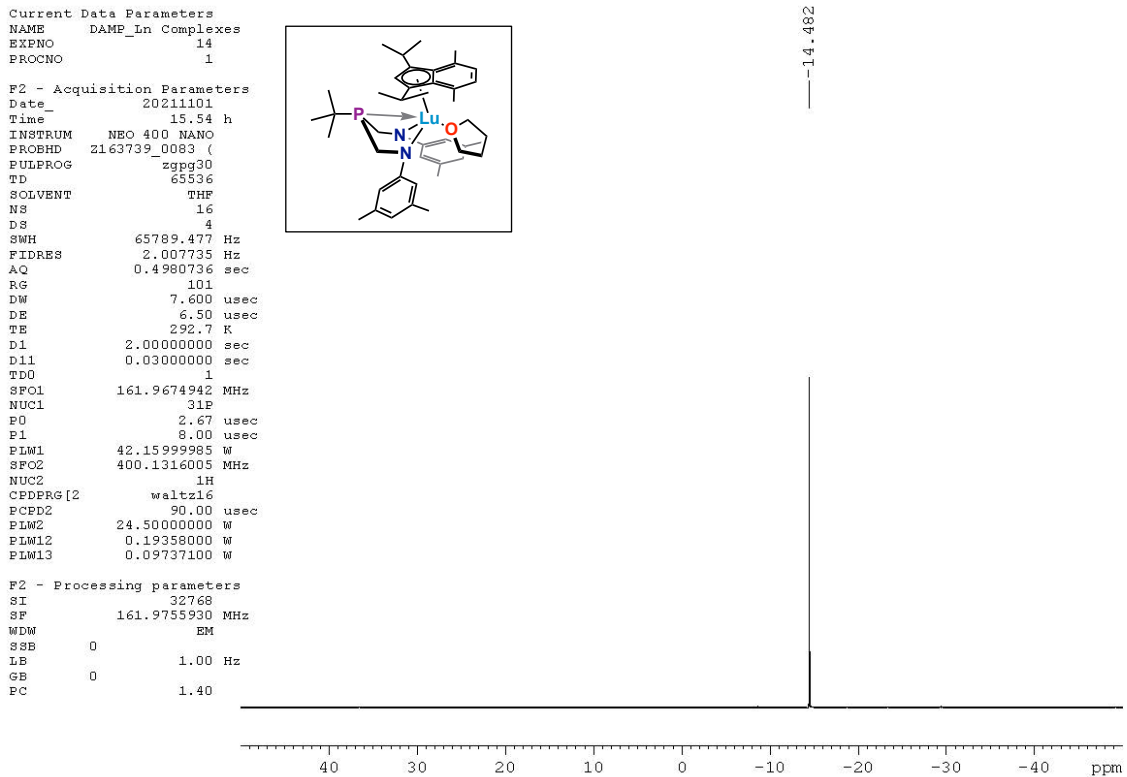

Figure S29.  $^{31}\text{P}\{^1\text{H}\}$  NMR spectrum of  $\text{Lu}(\eta^5\text{-}(1,3\text{-diisopropyl-4,7-dimethylindenyl})(\text{ArBiAMP}^{\text{Bu}})(\text{THF})$  (6) recrystallized from THF:pentane acquired in THF- $d_8$  at room temperature.

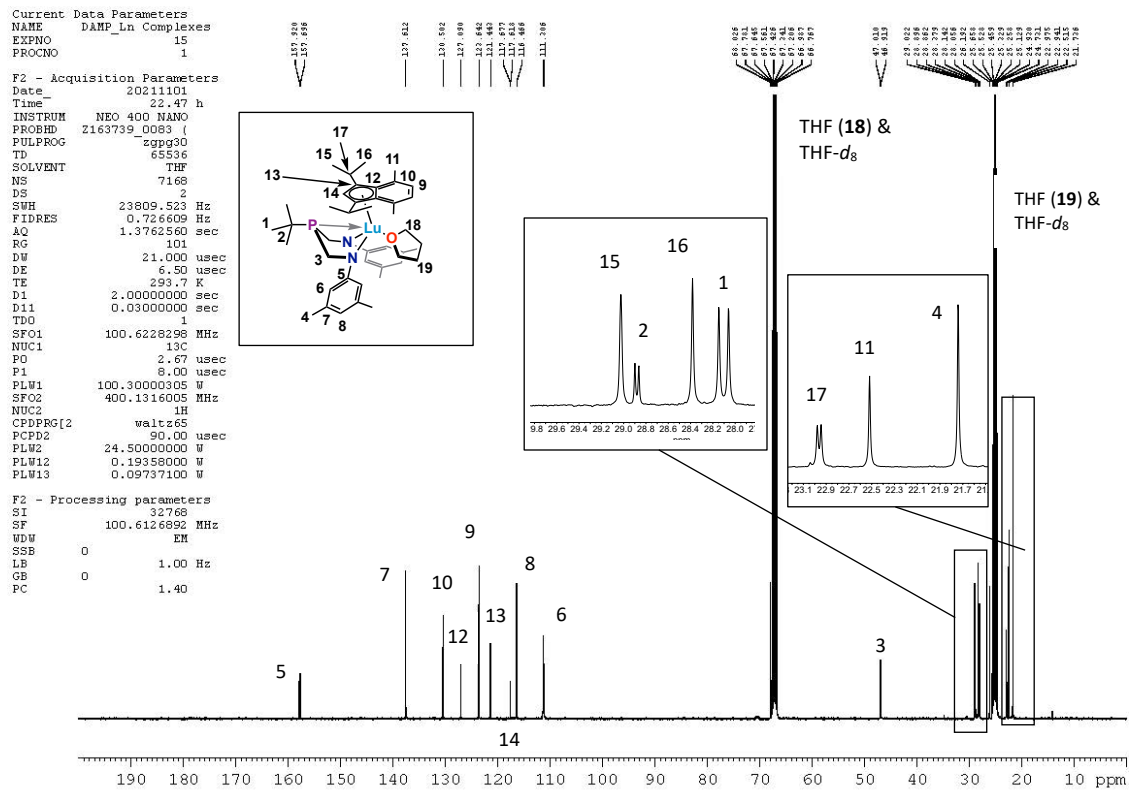

**Figure S30.**  $^{13}\text{C}\{^1\text{H}\}$  NMR spectrum of  $\text{Lu}(\eta^5\text{-}(1,3\text{-diisopropyl-4,7-dimethylindenyl})(\text{ArBiAMP}^{\text{Bu}})(\text{THF})$  (**6**) recrystallized from THF:pentane acquired in THF-*d*<sub>8</sub> at room temperature. Expansions are provided for two aliphatic regions to assist with visualization of the assigned resonances.

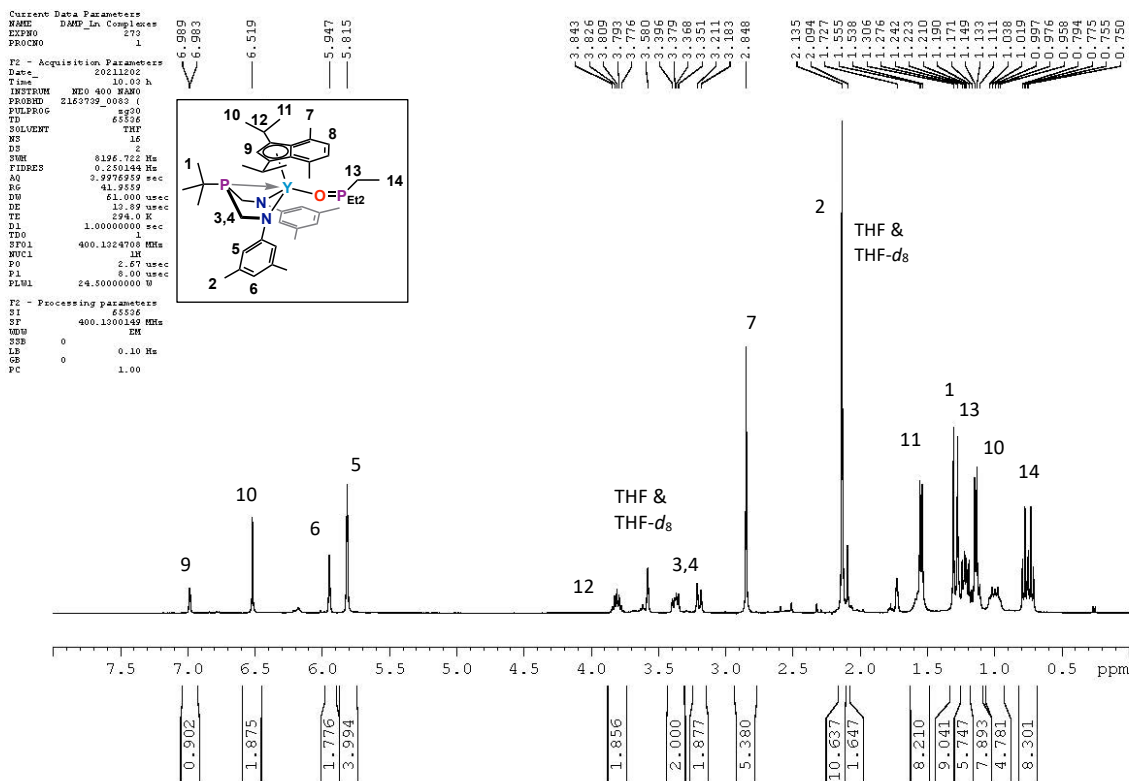

**Figure S31.**  $^1\text{H}$  NMR spectrum of the in-situ formed  $\text{Y}(\eta^5\text{-}(1,3\text{-diisopropyl-4,7-dimethylindenyl})(\text{ArBiAMP}^{\text{Bu}})(\text{O}=\text{PEt}_3)$  (**7**) acquired in THF-*d*<sub>8</sub> at room temperature.



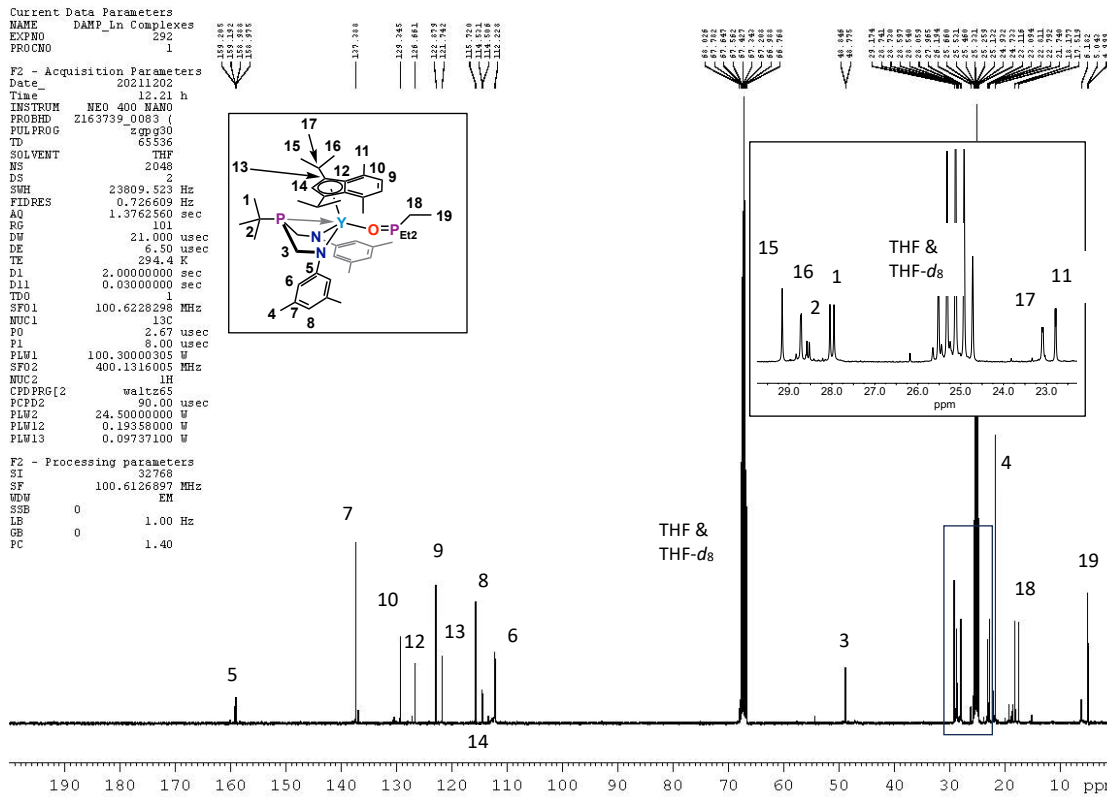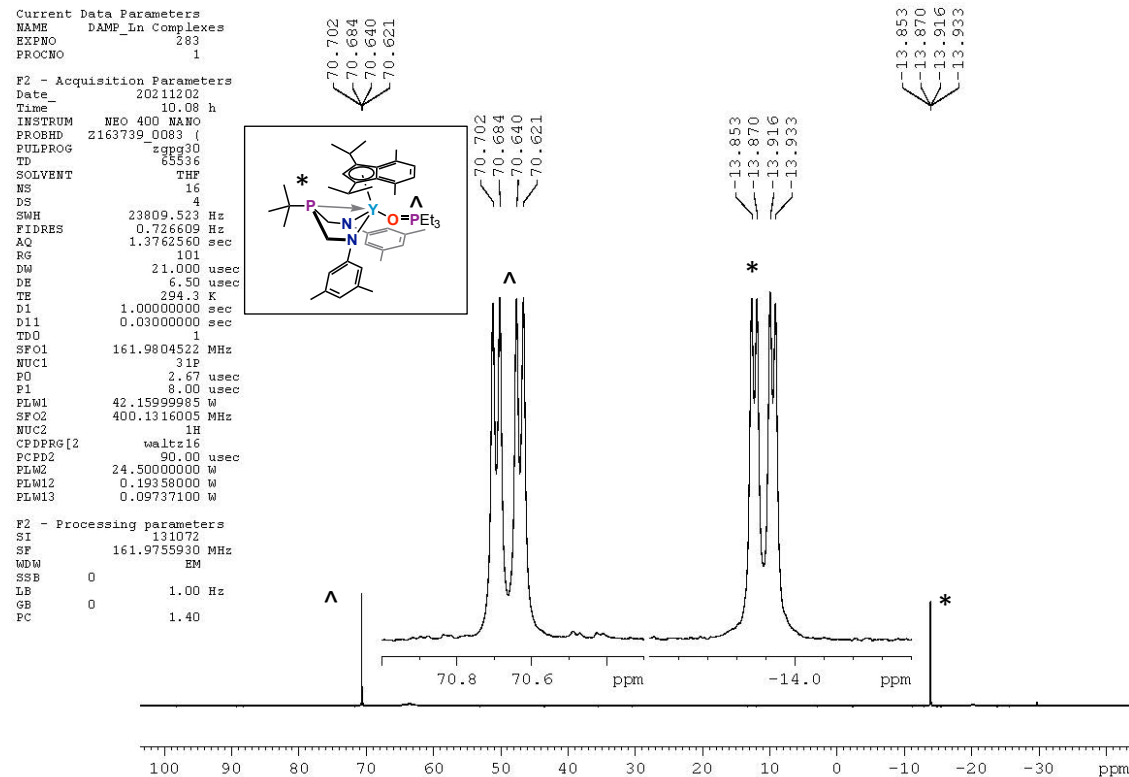

```
Current Data Parameters
NAME DAMP_Ln Complexes
EXPNO 302
PROCNO 1
```

```
F2 - Acquisition Parameters
Date_ 20211203
Time 10.41 h
INSTRUM NEO 400 NANO
PROBHD Z163739_0083 (
PULPROG zgpg30
TD 65536
SOLVENT THF
NS 3968
DS 0
SWH 10000.000 Hz
FIDRES 0.305176 Hz
AQ 3.2767999 sec
RG 101
DW 50.000 usec
DE 6.50 usec
TE 292.8 K
D1 10.00000000 sec
D11 0.03000000 sec
TD0 80
SFO1 19.6120638 MHz
NUC1 89Y
P1 25.00 usec
PLW1 91.43900299 W
SFO2 400.1300000 MHz
NUC2 1H
CPDPRG2 waltz65
PCPDZ 90.00 usec
PLW2 24.50000000 W
PLW12 0.19358000 W
```

```
F2 - Processing parameters
SI 262144
SF 19.6073623 MHz
WDW EM
SSB 0
LB 2.00 Hz
GB 0
PC 1.00
```

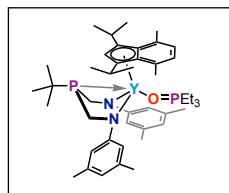

— 171.066  
— 170.543  
— 170.037

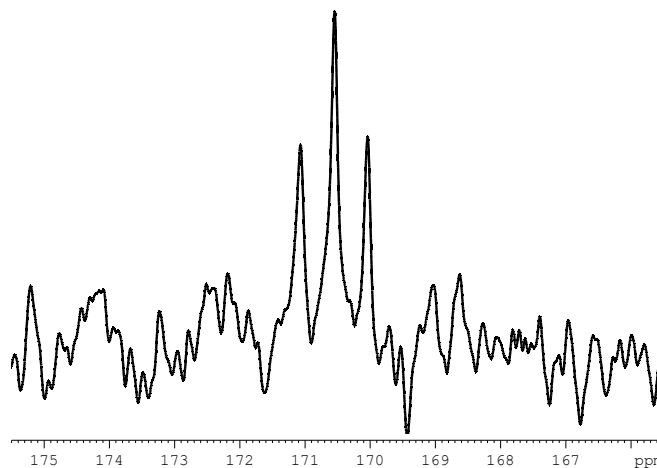

Figure S34.  $^{89}\text{Y}$  NMR spectrum of the *in-situ* formed  $\text{Y}(\eta^5\text{-}(1,3\text{-diisopropyl-4,7-dimethylindenyl})(\text{ArBiAMP}^{\text{tBu}})(\text{O}=\text{PEt}_3)$  (**8**) acquired in  $\text{THF-d}_8$ .

```
Current Data Parameters
NAME La_Ind_BiAMP_TEPO_VT
EXPNO 3
PROCNO 1
```

```
F2 - Acquisition Parameters
Date_ 20221017
Time 0.36 h
INSTRUM NEO 400 NANO
PROBHD Z163739_0083 (
PULPROG zgpg30
TD 65536
SOLVENT THF
NS 8192
DS 2
SWH 23809.523 Hz
FIDRES 0.726609 Hz
AQ 1.3762560 sec
RG 101
DW 21.000 usec
DE 6.50 usec
TE 296.8 K
D1 2.00000000 sec
D11 0.03000000 sec
TD0 1
SFO1 100.6228298 MHz
NUC1 13C
P1 2.67 usec
PLW1 100.30000305 W
SFO2 400.1316005 MHz
NUC2 1H
CPDPRG2 waltz65
PCPDZ 90.00 usec
PLW2 24.50000000 W
PLW12 0.19358000 W
PLW13 0.09737100 W
```

```
F2 - Processing parameters
SI 32768
SF 100.6126895 MHz
WDW EM
SSB 0
LB 1.00 Hz
GB 0
PC 1.40
```

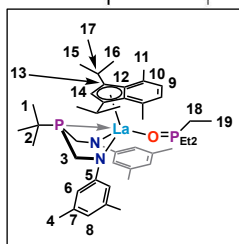

156.788, 156.784, 156.780, 137.868, 126.822, 126.818, 126.814, 126.810, 126.806, 115.887, 115.871, 115.855, 61.788, 61.784, 61.780, 61.776, 61.772, 61.768, 61.764, 61.760, 61.756, 61.752, 61.748, 61.744, 61.740, 61.736, 61.732, 61.728, 61.724, 61.720, 61.716, 61.712, 61.708, 61.704, 61.700, 61.696, 61.692, 61.688, 61.684, 61.680, 61.676, 61.672, 61.668, 61.664, 61.660, 61.656, 61.652, 61.648, 61.644, 61.640, 61.636, 61.632, 61.628, 61.624, 61.620, 61.616, 61.612, 61.608, 61.604, 61.600, 61.596, 61.592, 61.588, 61.584, 61.580, 61.576, 61.572, 61.568, 61.564, 61.560, 61.556, 61.552, 61.548, 61.544, 61.540, 61.536, 61.532, 61.528, 61.524, 61.520, 61.516, 61.512, 61.508, 61.504, 61.500, 61.496, 61.492, 61.488, 61.484, 61.480, 61.476, 61.472, 61.468, 61.464, 61.460, 61.456, 61.452, 61.448, 61.444, 61.440, 61.436, 61.432, 61.428, 61.424, 61.420, 61.416, 61.412, 61.408, 61.404, 61.400, 61.396, 61.392, 61.388, 61.384, 61.380, 61.376, 61.372, 61.368, 61.364, 61.360, 61.356, 61.352, 61.348, 61.344, 61.340, 61.336, 61.332, 61.328, 61.324, 61.320, 61.316, 61.312, 61.308, 61.304, 61.300, 61.296, 61.292, 61.288, 61.284, 61.280, 61.276, 61.272, 61.268, 61.264, 61.260, 61.256, 61.252, 61.248, 61.244, 61.240, 61.236, 61.232, 61.228, 61.224, 61.220, 61.216, 61.212, 61.208, 61.204, 61.200, 61.196, 61.192, 61.188, 61.184, 61.180, 61.176, 61.172, 61.168, 61.164, 61.160, 61.156, 61.152, 61.148, 61.144, 61.140, 61.136, 61.132, 61.128, 61.124, 61.120, 61.116, 61.112, 61.108, 61.104, 61.100, 61.096, 61.092, 61.088, 61.084, 61.080, 61.076, 61.072, 61.068, 61.064, 61.060, 61.056, 61.052, 61.048, 61.044, 61.040, 61.036, 61.032, 61.028, 61.024, 61.020, 61.016, 61.012, 61.008, 61.004, 61.000, 60.996, 60.992, 60.988, 60.984, 60.980, 60.976, 60.972, 60.968, 60.964, 60.960, 60.956, 60.952, 60.948, 60.944, 60.940, 60.936, 60.932, 60.928, 60.924, 60.920, 60.916, 60.912, 60.908, 60.904, 60.900, 60.896, 60.892, 60.888, 60.884, 60.880, 60.876, 60.872, 60.868, 60.864, 60.860, 60.856, 60.852, 60.848, 60.844, 60.840, 60.836, 60.832, 60.828, 60.824, 60.820, 60.816, 60.812, 60.808, 60.804, 60.800, 60.796, 60.792, 60.788, 60.784, 60.780, 60.776, 60.772, 60.768, 60.764, 60.760, 60.756, 60.752, 60.748, 60.744, 60.740, 60.736, 60.732, 60.728, 60.724, 60.720, 60.716, 60.712, 60.708, 60.704, 60.700, 60.696, 60.692, 60.688, 60.684, 60.680, 60.676, 60.672, 60.668, 60.664, 60.660, 60.656, 60.652, 60.648, 60.644, 60.640, 60.636, 60.632, 60.628, 60.624, 60.620, 60.616, 60.612, 60.608, 60.604, 60.600, 60.596, 60.592, 60.588, 60.584, 60.580, 60.576, 60.572, 60.568, 60.564, 60.560, 60.556, 60.552, 60.548, 60.544, 60.540, 60.536, 60.532, 60.528, 60.524, 60.520, 60.516, 60.512, 60.508, 60.504, 60.500, 60.496, 60.492, 60.488, 60.484, 60.480, 60.476, 60.472, 60.468, 60.464, 60.460, 60.456, 60.452, 60.448, 60.444, 60.440, 60.436, 60.432, 60.428, 60.424, 60.420, 60.416, 60.412, 60.408, 60.404, 60.400, 60.396, 60.392, 60.388, 60.384, 60.380, 60.376, 60.372, 60.368, 60.364, 60.360, 60.356, 60.352, 60.348, 60.344, 60.340, 60.336, 60.332, 60.328, 60.324, 60.320, 60.316, 60.312, 60.308, 60.304, 60.300, 60.296, 60.292, 60.288, 60.284, 60.280, 60.276, 60.272, 60.268, 60.264, 60.260, 60.256, 60.252, 60.248, 60.244, 60.240, 60.236, 60.232, 60.228, 60.224, 60.220, 60.216, 60.212, 60.208, 60.204, 60.200, 60.196, 60.192, 60.188, 60.184, 60.180, 60.176, 60.172, 60.168, 60.164, 60.160, 60.156, 60.152, 60.148, 60.144, 60.140, 60.136, 60.132, 60.128, 60.124, 60.120, 60.116, 60.112, 60.108, 60.104, 60.100, 60.096, 60.092, 60.088, 60.084, 60.080, 60.076, 60.072, 60.068, 60.064, 60.060, 60.056, 60.052, 60.048, 60.044, 60.040, 60.036, 60.032, 60.028, 60.024, 60.020, 60.016, 60.012, 60.008, 60.004, 60.000, 59.996, 59.992, 59.988, 59.984, 59.980, 59.976, 59.972, 59.968, 59.964, 59.960, 59.956, 59.952, 59.948, 59.944, 59.940, 59.936, 59.932, 59.928, 59.924, 59.920, 59.916, 59.912, 59.908, 59.904, 59.900, 59.896, 59.892, 59.888, 59.884, 59.880, 59.876, 59.872, 59.868, 59.864, 59.860, 59.856, 59.852, 59.848, 59.844, 59.840, 59.836, 59.832, 59.828, 59.824, 59.820, 59.816, 59.812, 59.808, 59.804, 59.800, 59.796, 59.792, 59.788, 59.784, 59.780, 59.776, 59.772, 59.768, 59.764, 59.760, 59.756, 59.752, 59.748, 59.744, 59.740, 59.736, 59.732, 59.728, 59.724, 59.720, 59.716, 59.712, 59.708, 59.704, 59.700, 59.696, 59.692, 59.688, 59.684, 59.680, 59.676, 59.672, 59.668, 59.664, 59.660, 59.656, 59.652, 59.648, 59.644, 59.640, 59.636, 59.632, 59.628, 59.624, 59.620, 59.616, 59.612, 59.608, 59.604, 59.600, 59.596, 59.592, 59.588, 59.584, 59.580, 59.576, 59.572, 59.568, 59.564, 59.560, 59.556, 59.552, 59.548, 59.544, 59.540, 59.536, 59.532, 59.528, 59.524, 59.520, 59.516, 59.512, 59.508, 59.504, 59.500, 59.496, 59.492, 59.488, 59.484, 59.480, 59.476, 59.472, 59.468, 59.464, 59.460, 59.456, 59.452, 59.448, 59.444, 59.440, 59.436, 59.432, 59.428, 59.424, 59.420, 59.416, 59.412, 59.408, 59.404, 59.400, 59.396, 59.392, 59.388, 59.384, 59.380, 59.376, 59.372, 59.368, 59.364, 59.360, 59.356, 59.352, 59.348, 59.344, 59.340, 59.336, 59.332, 59.328, 59.324, 59.320, 59.316, 59.312, 59.308, 59.304, 59.300, 59.296, 59.292, 59.288, 59.284, 59.280, 59.276, 59.272, 59.268, 59.264, 59.260, 59.256, 59.252, 59.248, 59.244, 59.240, 59.236, 59.232, 59.228, 59.224, 59.220, 59.216, 59.212, 59.208, 59.204, 59.200, 59.196, 59.192, 59.188, 59.184, 59.180, 59.176, 59.172, 59.168, 59.164, 59.160, 59.156, 59.152, 59.148, 59.144, 59.140, 59.136, 59.132, 59.128, 59.124, 59.120, 59.116, 59.112, 59.108, 59.104, 59.100, 59.096, 59.092, 59.088, 59.084, 59.080, 59.076, 59.072, 59.068, 59.064, 59.060, 59.056, 59.052, 59.048, 59.044, 59.040, 59.036, 59.032, 59.028, 59.024, 59.020, 59.016, 59.012, 59.008, 59.004, 59.000, 58.996, 58.992, 58.988, 58.984, 58.980, 58.976, 58.972, 58.968, 58.964, 58.960, 58.956, 58.952, 58.948, 58.944, 58.940, 58.936, 58.932, 58.928, 58.924, 58.920, 58.916, 58.912, 58.908, 58.904, 58.900, 58.896, 58.892, 58.888, 58.884, 58.880, 58.876, 58.872, 58.868, 58.864, 58.860, 58.856, 58.852, 58.848, 58.844, 58.840, 58.836, 58.832, 58.828, 58.824, 58.820, 58.816, 58.812, 58.808, 58.804, 58.800, 58.796, 58.792, 58.788, 58.784, 58.780, 58.776, 58.772, 58.768, 58.764, 58.760, 58.756, 58.752, 58.748, 58.744, 58.740, 58.736, 58.732, 58.728, 58.724, 58.720, 58.716, 58.712, 58.708, 58.704, 58.700, 58.696, 58.692, 58.688, 58.684, 58.680, 58.676, 58.672, 58.668, 58.664, 58.660, 58.656, 58.652, 58.648, 58.644, 58.640, 58.636, 58.632, 58.628, 58.624, 58.620, 58.616, 58.612, 58.608, 58.604, 58.600, 58.596, 58.592, 58.588, 58.584, 58.580, 58.576, 58.572, 58.568, 58.564, 58.560, 58.556, 58.552, 58.548, 58.544, 58.540, 58.536, 58.532, 58.528, 58.524, 58.520, 58.516, 58.512, 58.508, 58.504, 58.500, 58.496, 58.492, 58.488, 58.484, 58.480, 58.476, 58.472, 58.468, 58.464, 58.460, 58.456, 58.452, 58.448, 58.444, 58.440, 58.436, 58.432, 58.428, 58.424, 58.420, 58.416, 58.412, 58.408, 58.404, 58.400, 58.396, 58.392, 58.388, 58.384, 58.380, 58.376, 58.372, 58.368, 58.364, 58.360, 58.356, 58.352, 58.348, 58.344, 58.340, 58.336, 58.332, 58.328, 58.324, 58.320, 58.316, 58.312, 58.308, 58.304, 58.300, 58.296, 58.292, 58.288, 58.284, 58.280, 58.276, 58.272, 58.268, 58.264, 58.260, 58.256, 58.252, 58.248, 58.244, 58.240, 58.236, 58.232, 58.228, 58.224, 58.220, 58.216, 58.212, 58.208, 58.204, 58.200, 58.196, 58.192, 58.188, 58.184, 58.180, 58.176, 58.172, 58.168, 58.164, 58.160, 58.156, 58.152, 58.148, 58.144, 58.140, 58.136, 58.132, 58.128, 58.124, 58.120, 58.116, 58.112, 58.108, 58.104, 58.100, 58.096, 58.092, 58.088, 58.084, 58.080, 58.076, 58.072, 58.068, 58.064, 58.060, 58.056, 58.052, 58.048, 58.044, 58.040, 58.036, 58.032, 58.028, 58.024, 58.020, 58.016, 58.012, 58.008, 58.004, 58.000, 57.996, 57.992, 57.988, 57.984, 57.980, 57.976, 57.972, 57.968, 57.964, 57.960, 57.956, 57.952, 57.948, 57.944, 57.940, 57.936, 57.932, 57.928, 57.924, 57.920, 57.916, 57.912, 57.908, 57.904, 57.900, 57.896, 57.892, 57.888, 57.884, 57.880, 57.876, 57.872, 57.868, 57.864, 57.860, 57.856, 57.852, 57.848, 57.844, 57.840, 57.836, 57.832, 57.828, 57.824, 57.820, 57.816, 57.812, 57.808, 57.804, 57.800, 57.796, 57.792, 57.788, 57.784, 57.780, 57.776, 57.772, 57.768, 57.764, 57.760, 57.756, 57.752, 57.748, 57.744, 57.740, 57.736, 57.732, 57.728, 57.724, 57.720, 57.716, 57.712, 57.708, 57.704, 57.700, 57.696, 57.692, 57.688, 57.684, 57.680, 57.676, 57.672, 57.668, 57.664, 57.660, 57.656, 57.652, 57.648, 57.644, 57.640, 57.636, 57.632, 57.628, 57.624, 57.620, 57.616, 57.612, 57.608, 57.604, 57.600, 57.596, 57.592, 57.588, 57.584, 57.580, 57.576, 57.572, 57.568, 57.564, 57.560, 57.556, 57.552, 57.548, 57.544, 57.540, 57.536, 57.532, 57.528, 57.524, 57.520, 57.516, 57.512, 57.508, 57.504, 57.500, 57.496, 57.492, 57.488, 57.484, 57.480, 57.476, 57.472, 57.468, 57.464, 57.460, 57.456, 57.452, 57.448, 57.444, 57.440, 57.436, 57.432, 57.428, 57.424, 57.420, 57.416, 57.412, 57.408, 57.404, 57.400, 57.396, 57.392, 57.388, 57.384, 57.380, 57.376, 57.372, 57.368, 57.364, 57.360, 57.356, 57.352, 57.348, 57.344, 57.340, 57.336, 57.332, 57.328, 57.324, 57.320, 57.316, 57.312, 57.308, 57.304, 57.300, 57.296, 57.292, 57.288, 57.284, 57.280, 57.276, 57.272, 57.268, 57.264, 57.260, 57.256, 57.252, 57.248, 57.244, 57.240, 57.236, 57.232, 57.228, 57.224, 57.220, 57.216, 57.212, 57.208, 57.204, 57.200, 57.196, 57.192, 57.188, 57.184, 57.180, 57.176, 57.172, 57.168, 57.164, 57.160, 57.156, 57.152, 57.148, 57.144, 57.140, 57.136, 57.132, 57.128, 57.124, 57.120, 57.116, 57.112, 57.108, 57.104, 57.100, 57.096, 57.092, 57.088, 57.084, 57.080, 57.076, 57.072, 57.068, 57.064, 57.060, 57.056, 57.052, 57.048, 57.044, 57.040, 57.036, 57.032, 57.028, 57.024, 57.020, 57.016, 57.012, 57.008, 57.004, 57.000, 56.996, 56.992, 56.988, 56.984, 56.980, 56.976, 56.972, 56.968, 56.964, 56.960, 56.956, 56.952, 56.948, 56.944, 56.940, 56.936, 56.932, 56.928, 56.924, 56.920, 56.916, 56.912, 56.908, 56.904, 56.900, 56.896, 56.892, 56.888, 56.884, 56.880, 56.876, 56.872, 56.868, 56.864, 56.860, 56.856, 56.852, 56.848, 56.844, 56.840, 56.836, 56.832, 56.828, 56.824, 56.820, 56.816, 56.812, 56.808, 56.804, 56.800, 56.796, 56.792, 56.788, 56.784, 56.780, 56.776, 56.772, 56.768, 56.764, 56.760, 56.756, 56.752, 56.748, 56.744, 56.740, 56.736, 56.732, 56.728, 56.724, 56.720, 56.716, 56.712, 56.708, 56.704, 56.700, 56.696, 56.692, 56.688, 56.684, 56.680, 56.676, 56.672, 56.668, 56.664, 56.660, 56.656, 56.652, 56.648, 56.644, 56.640, 56.636, 56.632, 56.628, 56.624, 56.620, 56.616, 56.612, 56.608, 56.604, 56.600, 56.596, 56.592, 56.588, 56.584, 56.580, 56.576, 56.572, 56.568, 56.564, 56.560, 56.556,

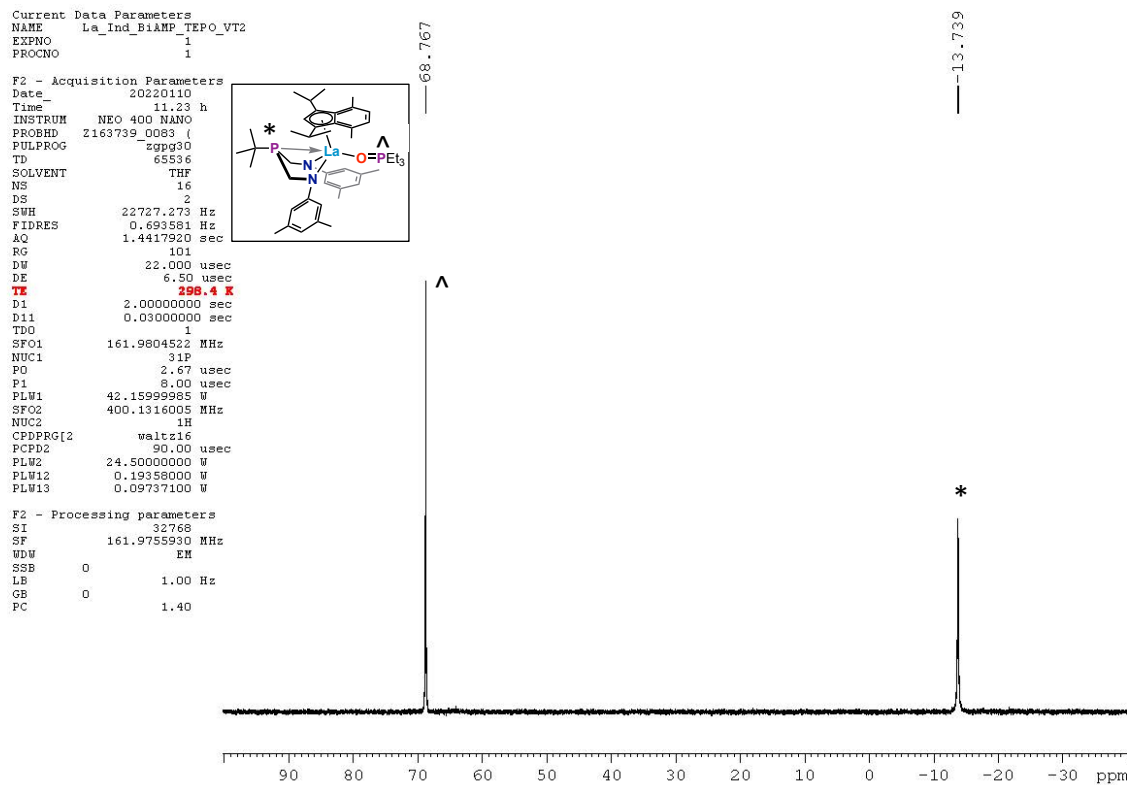

Figure S36.  $^{31}\text{P}\{^1\text{H}\}$  NMR spectrum of the *in-situ* formed  $\text{La}(\eta^5\text{-}(1,3\text{-diisopropyl-4,7-dimethylindenyl}))(\text{ArBiAMP}^{\text{tBu}})(\text{O}=\text{PEt}_3)$  (**8**) acquired in  $\text{THF-d}_3$  recorded at 25 °C (298 K).

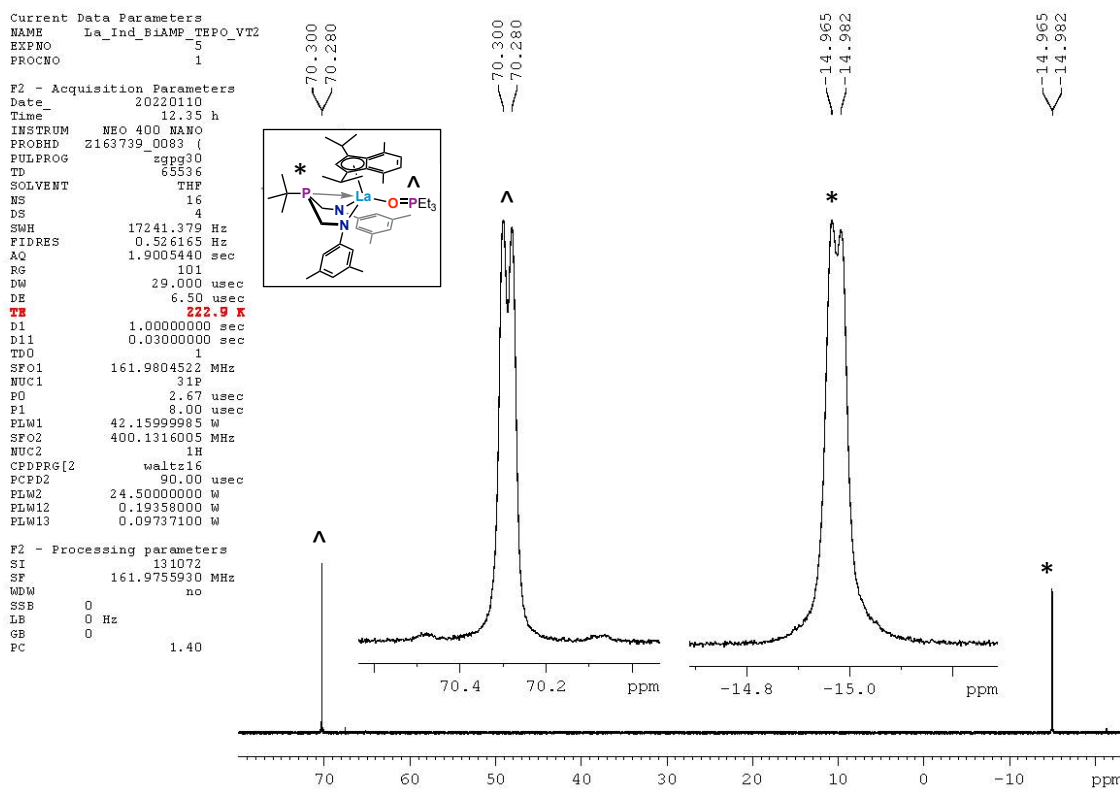

Figure S37. Expansion of the phosphorus resonances of the  $^{31}\text{P}\{^1\text{H}\}$  NMR spectrum of the *in-situ* formed  $\text{La}(\eta^5\text{-}(1,3\text{-diisopropyl-4,7-dimethylindenyl}))(\text{ArBiAMP}^{\text{tBu}})(\text{O}=\text{PEt}_3)$  (**8**) acquired in  $\text{THF-d}_3$  recorded at -50 °C (223 K).

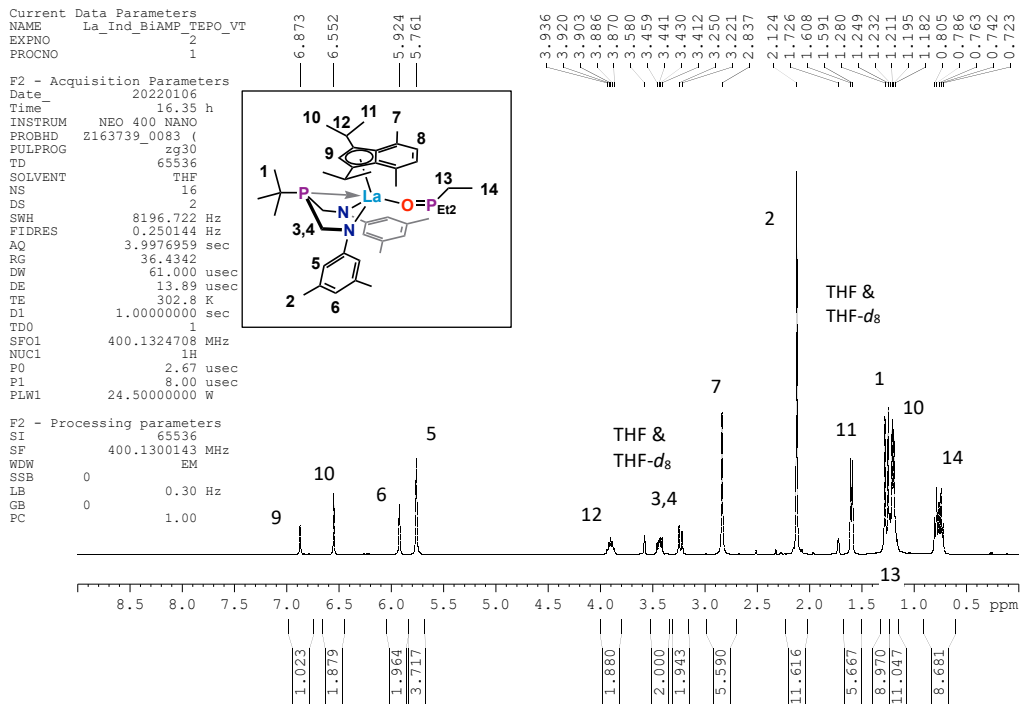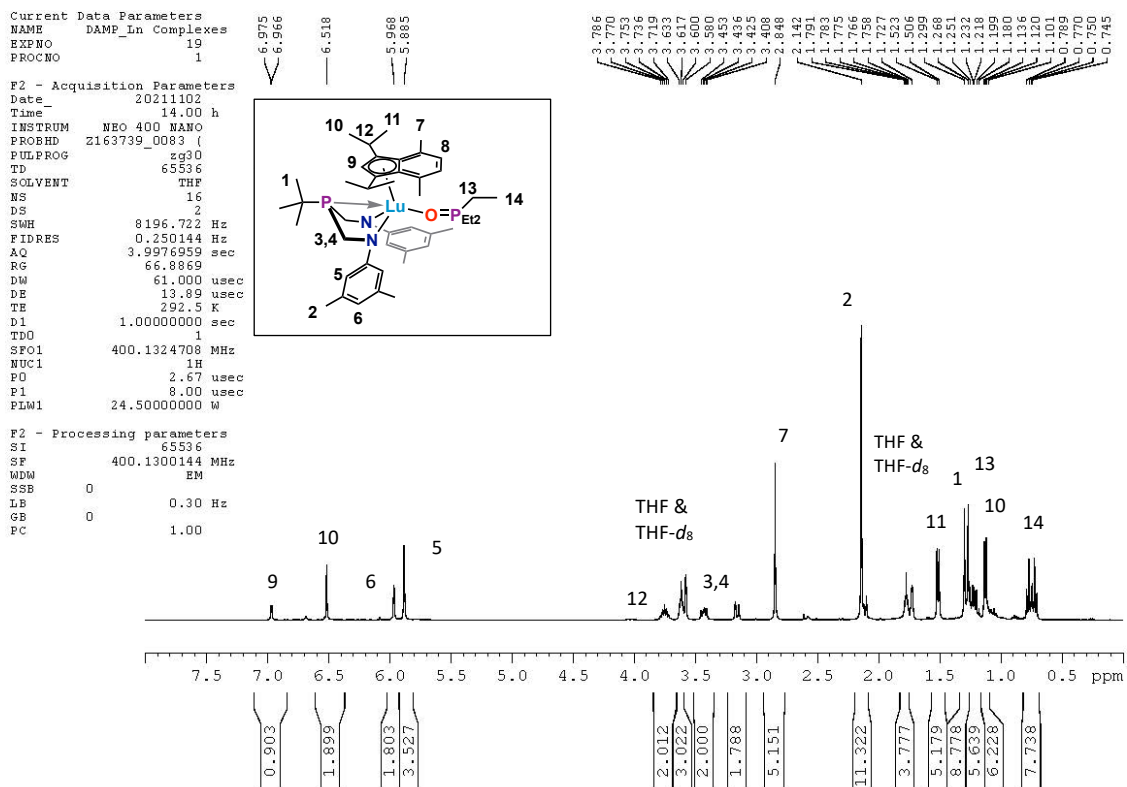

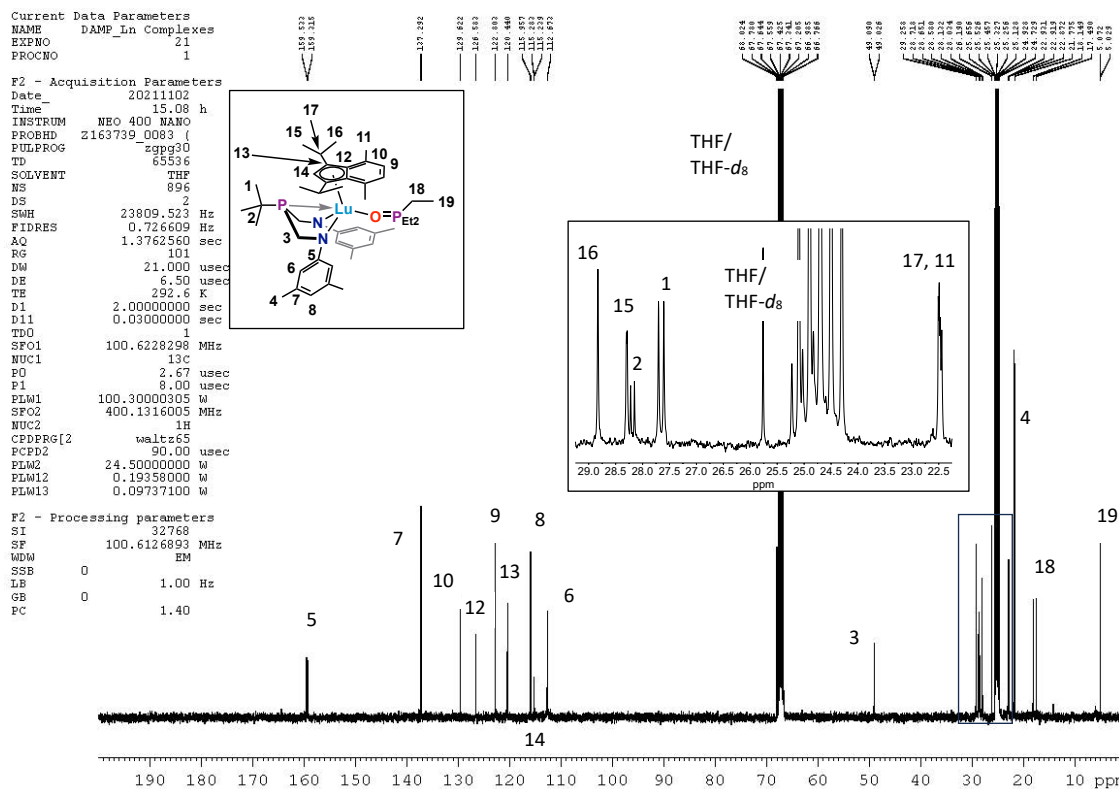

Figure S40.  $^{13}\text{C}\{^1\text{H}\}$  NMR spectrum of the *in-situ* formed  $\text{Lu}(\eta^5\text{-}(1,3\text{-diisopropyl-4,7-dimethylindenyl}))(\text{ArBiAMP}^{\text{tBu}})(\text{O}=\text{PEt}_3)$  (9) acquired in  $\text{THF-d}_8$  at room temperature. An expansion is provided for two aliphatic regions to assist with visualization of the assigned resonances.

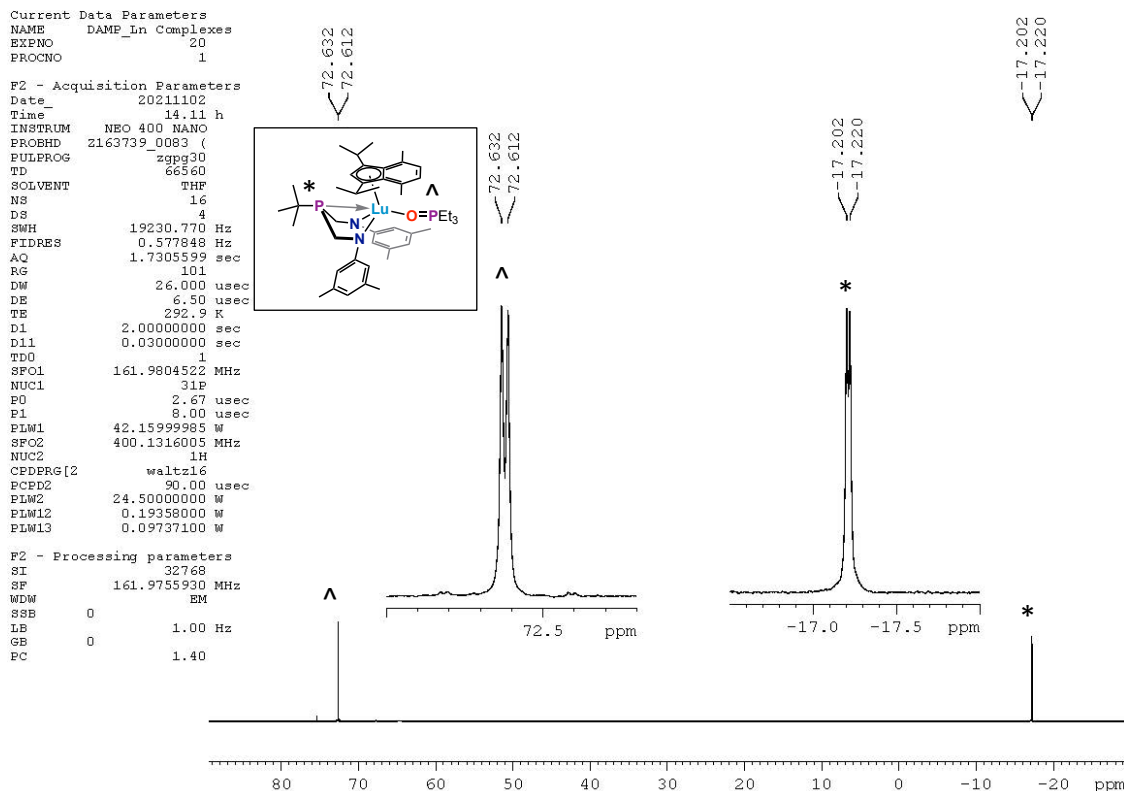

Figure S41.  $^{31}\text{P}\{^1\text{H}\}$  NMR spectrum of the *in-situ* formed  $\text{Lu}(\eta^5\text{-}(1,3\text{-diisopropyl-4,7-dimethylindenyl}))(\text{ArBiAMP}^{\text{tBu}})(\text{O}=\text{PEt}_3)$  (9) acquired in  $\text{THF-d}_8$  at 25 °C (298 K).

## 2.2. IR (ATR) data

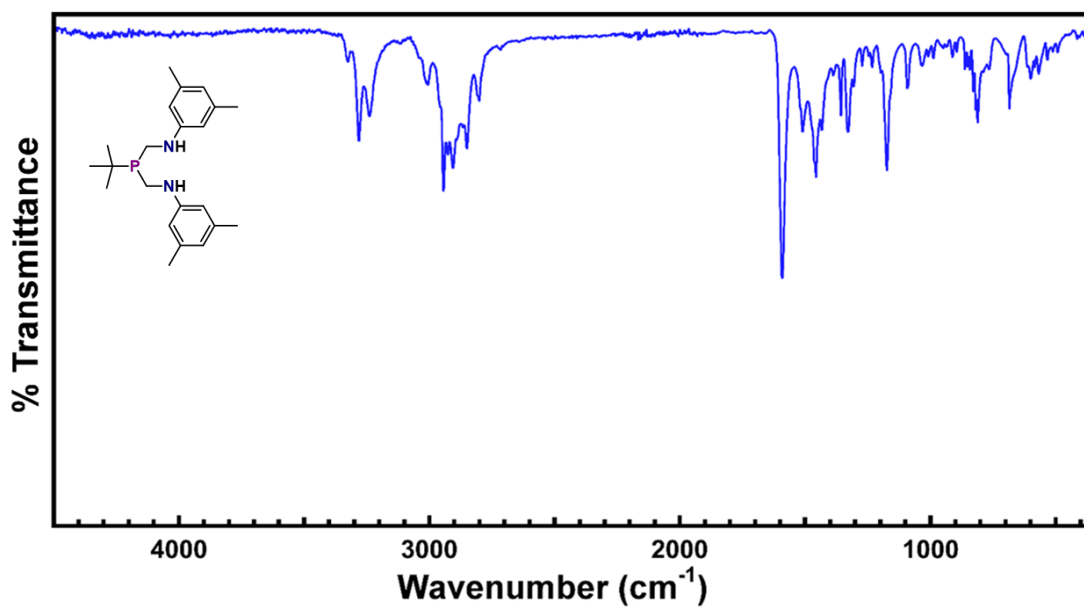

**Figure S42.** FT-IR (ATR) spectrum of  $ArBiAMP^{tBu}$ .  $\nu$  ( $cm^{-1}$ ): 359 (w), 413 (w), 491 (w), 533 (w), 568 (m), 599 (m), 684 (s), 765 (m), 811 (s), 842 (m), 911 (m), 988 (m), 1032 (m), 1092 (m), 1173 (s), 1232 (m), 1272 (m), 1328 (s), 1357 (s), 1456 (s), 1509 (s), 1591 (s), 2801 (m), 2850 (s), 2905 (s), 2926 (s), 2944 (s), 3005 (m), 3237 (s), 3281 (s), 3324 (m).

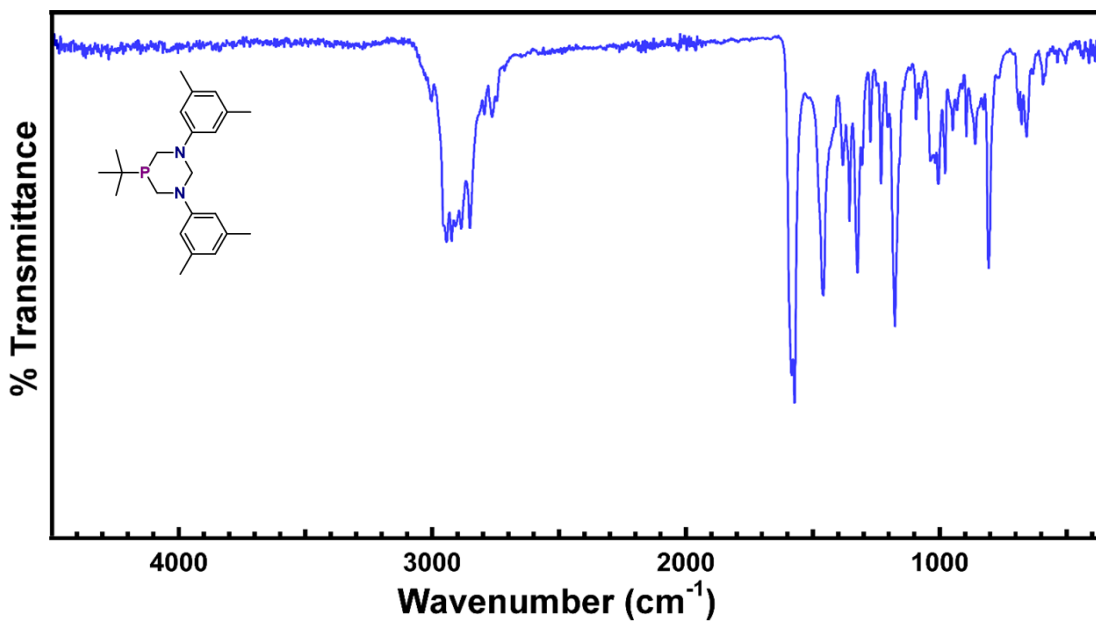

**Figure S43.** FT-IR (ATR) spectrum of  $(ArBiAMP^{tBu})CH_2$ .  $\nu$  ( $cm^{-1}$ ): 501 (w), 535 (w), 592 (m), 657 (m), 677 (m), 807 (s), 859 (m), 894 (m), 931 (m), 948 (m), 978 (s), 1004 (s), 1017 (s), 1075 (m), 1176 (s), 1230 (s), 1272 (s), 1324 (s), 1355 (s), 1380 (m), 1458 (s), 1572 (s), 2746 (m), 2765 (m), 2794 (m), 2851 (s), 2886 (s), 2924 (s), 2943 (s), 3002 (m).

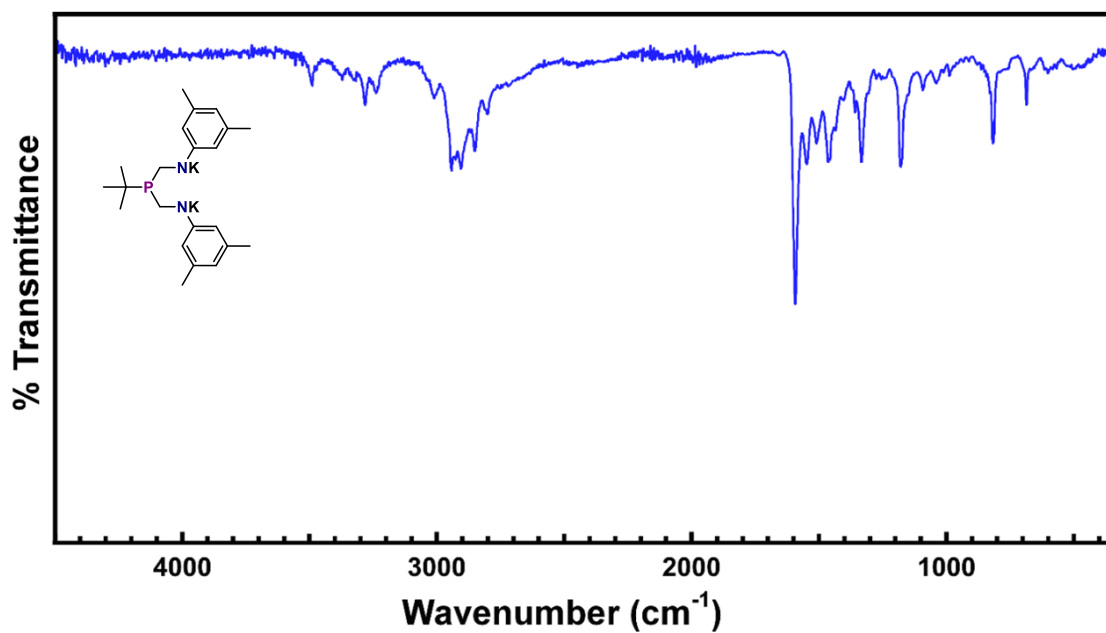

**Figure S44.** FT-IR (ATR) spectrum of  $(^{\text{Ar}}\text{BiAMP}^{\text{tBu}})\text{K}_2$ .  $\nu$  ( $\text{cm}^{-1}$ ): 358 (w), 458 (w), 504 (w), 601 (w), 685 (m), 816 (s), 987 (w), 1038 (w), 1092 (w), 1179 (s), 1333 (s), 1464 (s), 1509 (m), 1548 (s), 1593 (s), 2801 (m), 2850 (s), 2904 (s), 2942 (s), 3010 (m), 3238 (m), 3281 (m), 3318 (w), 3371 (w), 3489 (m).

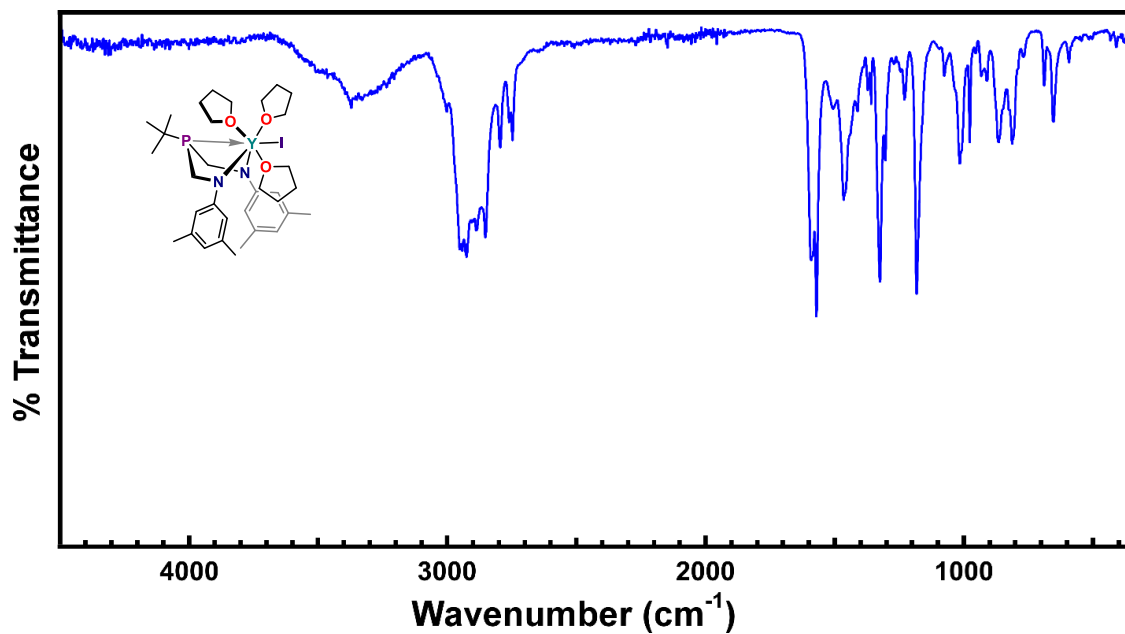

**Figure S45.** FT-IR (ATR) spectrum of  $\text{Yl}(^{\text{Ar}}\text{BiAMP}^{\text{tBu}})(\text{THF})_3$  (**1**).  $\nu$  ( $\text{cm}^{-1}$ ): 375 (w), 409 (w), 592 (w), 652 (s), 688 (m), 767 (w), 812 (s), 865 (s), 909 (w), 932 (w), 976 (s), 1015 (s), 1075 (w), 1182 (s), 1229 (s), 1324 (s), 1464 (s), 1570 (s), 1566 (s), 2747 (s), 2765 (s), 2852 (s), 2886 (s), 2924 (s), 2928 (s), 3368 (m, br).

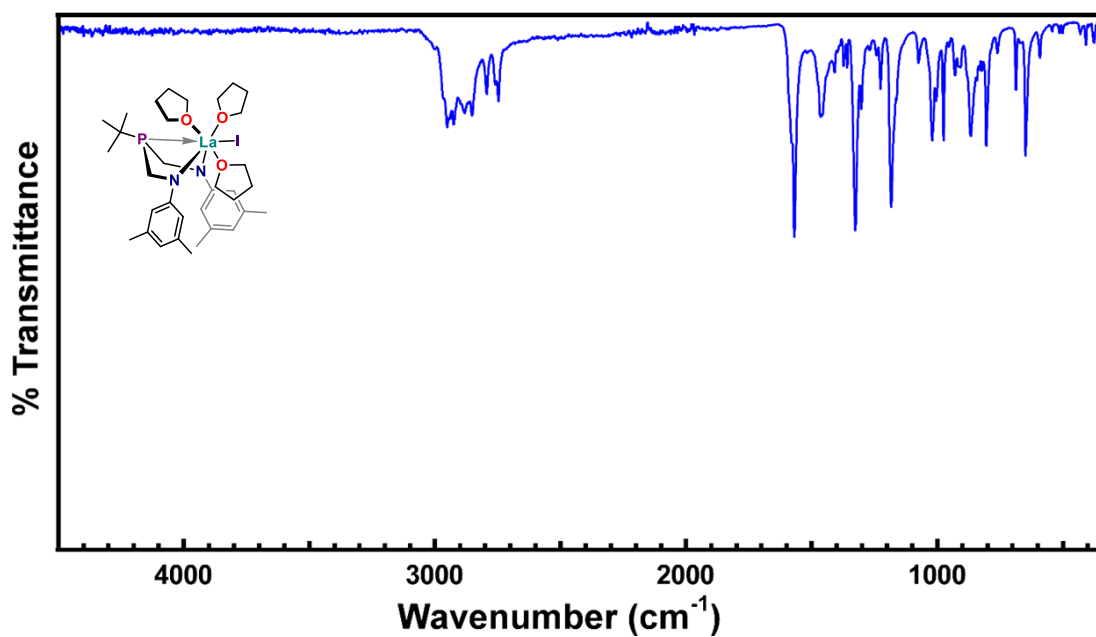

**Figure S46.** FT-IR (ATR) spectrum of  $\text{LaI}(\text{ArBiAMP}^{\text{iBu}})(\text{THF})_3$  (2).  $\nu$  ( $\text{cm}^{-1}$ ): 373 (w), 409 (w), 500 (w), 503 (w), 542 (w), 592 (m), 648 (s), 686 (m), 758 (w), 804 (s), 869 (s), 917 (w), 931 (w), 976 (s), 1019 (s), 1072 (m), 1182 (s), 1225 (m), 1315 (m), 1325 (s), 1341 (m), 1359 (m), 1410 (m), 1459 (s), 1568 (s), 2749 (m), 2793 (m), 2850 (m), 2878 (m), 2924 (m), 2950 (m).

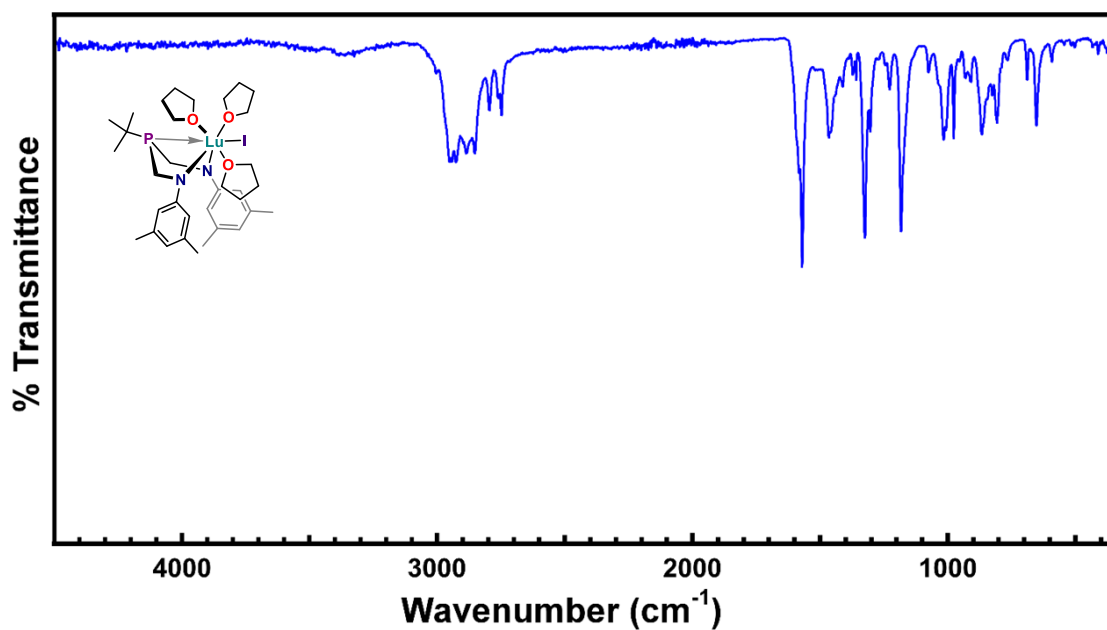

**Figure S47.** FT-IR (ATR) spectrum of  $\text{LuI}(\text{ArBiAMP}^{\text{iBu}})(\text{THF})_3$  (3).  $\nu$  ( $\text{cm}^{-1}$ ): 377 (w), 410 (w), 591 (m), 652 (s), 659 (m), 765 (w), 807 (s), 866 (s), 883 (m), 929 (m), 977 (s), 1016 (s), 1075 (w), 1183 (s), 1227 (m), 1303 (s), 1324 (s), 1359 (m), 1411 (m), 1465 (s), 1570 (s), 2747 (m), 2795 (m), 2852 (s), 2882 (s), 2925 (s), 2951 (s).



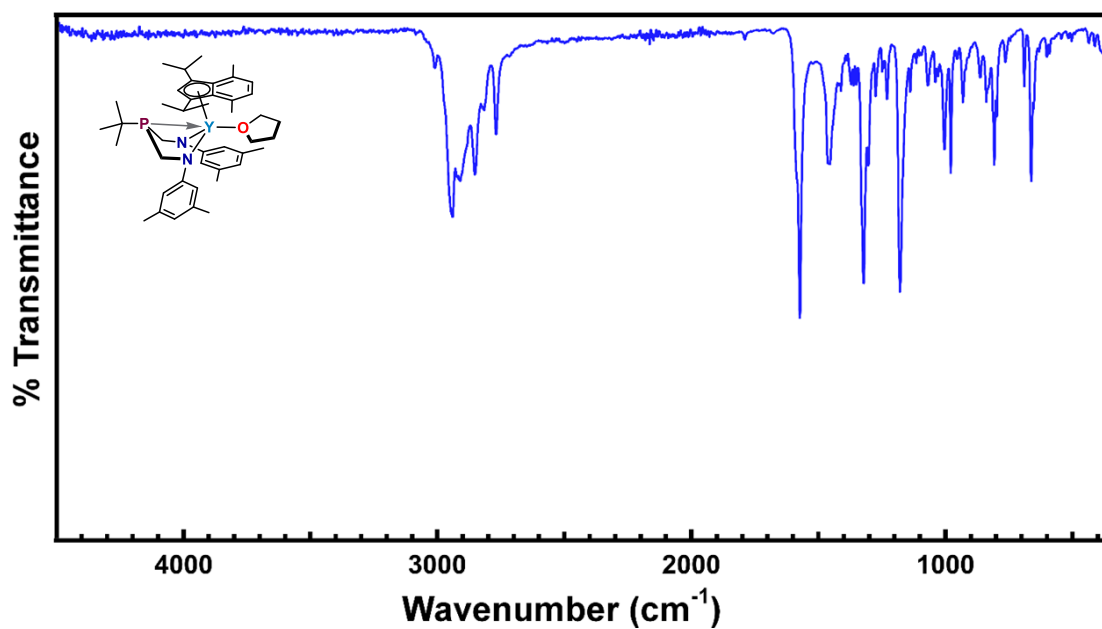

**Figure S48.** FT-IR (ATR) spectrum of  $\text{Y}(\eta^5\text{-}(1,3\text{-diisopropyl-4,7-dimethylindenyl})(\text{ArBiAMP}^{\text{tBu}})(\text{THF})$  (**4**).  $\nu$  ( $\text{cm}^{-1}$ ): 378 (w), 391 (w), 435 (w), 589 (w), 662 (s), 689 (m), 763 (w), 807 (s), 838 (m), 864 (m), 930 (m), 979 (s), 1003 (s), 1040 (w), 1068 (m), 1138 (m), 1178 (s), 1229 (m), 1275 (m), 1322 (s), 1455 (s), 1572 (s), 2768 (s), 2851 (s), 2910 (s), 2940 (s), 3009 (m).

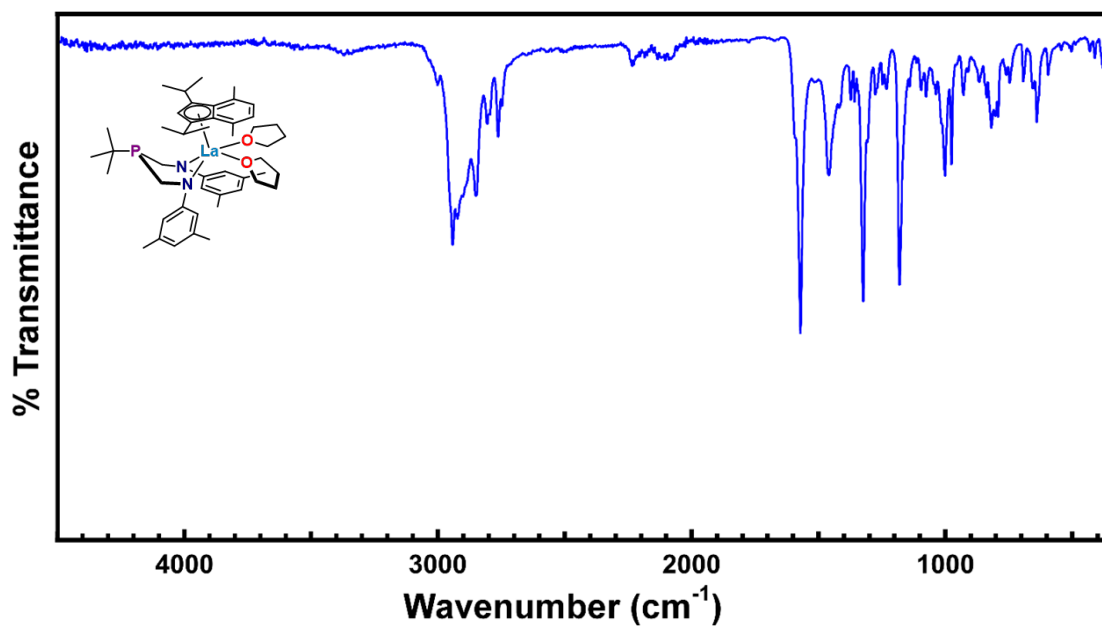

**Figure S49.** FT-IR (ATR) spectrum of  $\text{La}(\eta^5\text{-}(1,3\text{-diisopropyl-4,7-dimethylindenyl})(\text{ArBiAMP}^{\text{tBu}})(\text{THF})_2$  (**5**).  $\nu$  ( $\text{cm}^{-1}$ ): 379 (w), 383 (w), 594 (m), 639 (s), 693 (m), 745 (m), 791 (s), 818 (s), 867 (m), 927 (m), 976 (s), 1001 (s), 1076 (m), 1078 (m), 1180 (s), 1230 (m), 1275 (m), 1323 (s), 1456 (s), 1570 (s), 2081 (m), 2234 (m), 2762 (s), 2805 (s), 2850 (s), 2923 (s), 2942 (s), 3368 (w).

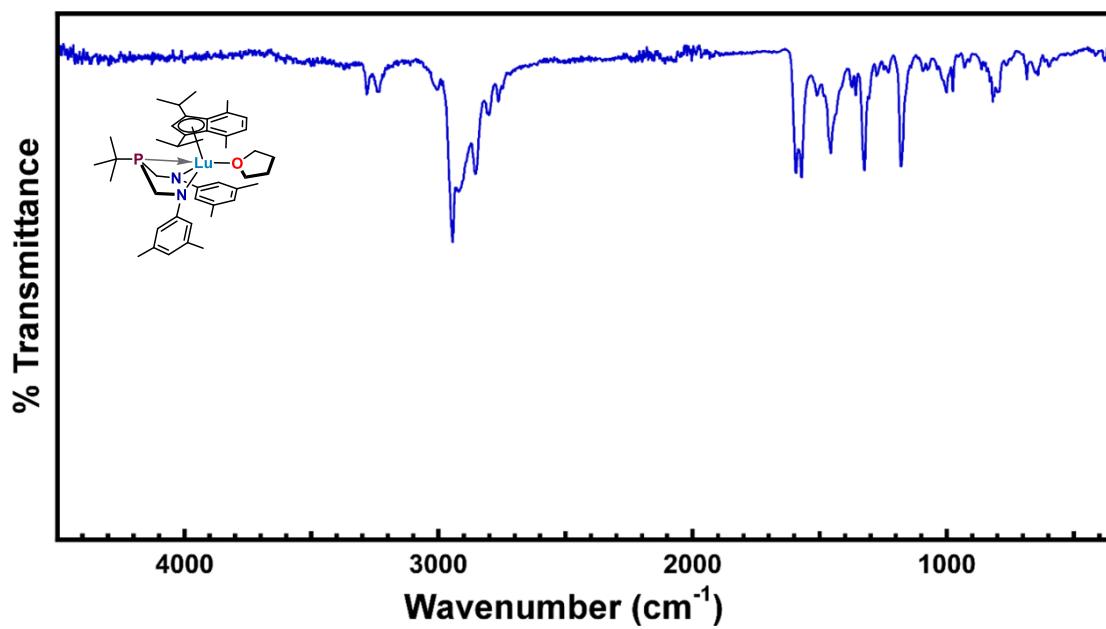

**Figure S50.** FT-IR (ATR) spectrum of  $\text{Lu}(\eta^5\text{-}(1,3\text{-diisopropyl-4,7-dimethylindenyl}))(\text{ArBiAMP}^{\text{TBu}})(\text{THF})$  (**6**).  $\nu$  ( $\text{cm}^{-1}$ ): 379 (w), 595 (w), 640 (w), 685 (m), 793 (m), 819 (m), 929 (w), 976 (m), 1001 (m), 1037 (w), 1093 (w), 1179 (s), 1193 (w), 1276 (w), 1324 (s), 1337 (m), 1356 (m), 1456 (s), 1510 (m), 1571 (s), 1594 (s), 2764 (m), 2800 (m), 2853 (s), 2919 (s), 2944 (s), 3003 (m), 3233 (m), 3282 (m).

## 2.3. Supplemental Tables and Graphs

**Table S1a.** Comparative bond lengths and angles for complexes  $Ml(ArBiAMP^{tBu})(THF)_3$  ( $M = Y(1), La(2), Lu(3)$ )

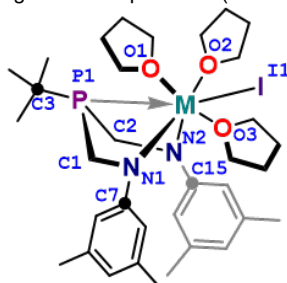

| Compound /<br>Atom <sup>1</sup> -Atom <sup>2</sup> * | Yl(ArBiAMP <sup>tBu</sup> )(THF) <sub>3</sub> (1) | La(ArBiAMP <sup>tBu</sup> )(THF) <sub>3</sub> (2) | Lu(ArBiAMP <sup>tBu</sup> )(THF) <sub>3</sub> (3) |
|------------------------------------------------------|---------------------------------------------------|---------------------------------------------------|---------------------------------------------------|
|                                                      | <b>Selected bond lengths, Å</b>                   |                                                   |                                                   |
| Metal-P1                                             | 3.124(2)                                          | 3.192(1)                                          | 3.077(1)                                          |
| Metal-I1                                             | 3.119(2)                                          | 3.226(6)                                          | 3.046(4)                                          |
| Metal-N1                                             | 2.296(4)                                          | 2.405(3)                                          | 2.244(3)                                          |
| Metal-N2                                             | 2.330(5)                                          | 2.402(4)                                          | 2.239(4)                                          |
| Metal-O1                                             | 2.456(4)                                          | 2.552(3)                                          | 2.330(3)                                          |
| Metal-O2                                             | 2.427(4)                                          | 2.537(3)                                          | 2.377(3)                                          |
| Metal-O3                                             | 2.395(4)                                          | 2.571(3)                                          | 2.374(3)                                          |
| P1-C1                                                | 1.863(5)                                          | 1.858(4)                                          | 1.842(5)                                          |
| P1-C2                                                | 1.874(5)                                          | 1.848(4)                                          | 1.841(5)                                          |
| P1-C3                                                | 1.883(5)                                          | 1.869(5)                                          | 1.868(5)                                          |
| N1-C1                                                | 1.485(6)                                          | 1.453(5)                                          | 1.465(6)                                          |
| N1-C7                                                | 1.397(6)                                          | 1.378(5)                                          | 1.377(6)                                          |
| N2-C2                                                | 1.476(6)                                          | 1.460(5)                                          | 1.465(6)                                          |
| N2-C15                                               | 1.402(6)                                          | 1.385(5)                                          | 1.387(6)                                          |
|                                                      | <b>Selected angles, °</b>                         |                                                   |                                                   |
| I1-Metal-P1                                          | 160.4(4)                                          | 163.2(2)                                          | 159.2(2)                                          |
| N1-Metal-N2                                          | 91.7(1)                                           | 88.8(1)                                           | 92.2(1)                                           |
| I1-Metal-N1                                          | 139.6(1)                                          | 139.9(8)                                          | 140.1(1)                                          |
| I1-Metal-N2                                          | 121.0(1)                                          | 122.7(8)                                          | 120.2(9)                                          |
| I1-Metal-O1                                          | 81.7(1)                                           | 80.6(7)                                           | 81.3(8)                                           |
| I1-Metal-O2                                          | 80.9(8)                                           | 83.7(9)                                           | 82.4(9)                                           |
| I1-Metal-O3                                          | 81.5(9)                                           | 83.0(7)                                           | 80.2(8)                                           |
| N1-Metal-P1                                          | 57.4(1)                                           | 55.2(9)                                           | 57.6(9)                                           |
| N2-Metal-P1                                          | 56.2(9)                                           | 54.2(9)                                           | 57.1(9)                                           |
| O1-Metal-P1                                          | 93.1(1)                                           | 113.9(7)                                          | 117.3(8)                                          |
| O2-Metal-P1                                          | 79.5(8)                                           | 92.2(9)                                           | 91.8(9)                                           |
| O3-Metal-P1                                          | 115.8(9)                                          | 80.2(7)                                           | 79.0(8)                                           |
| O1-Metal-O2                                          | 76.6(1)                                           | 130.1(1)                                          | 127.9(1)                                          |
| O1-Metal-O3                                          | 128.2(1)                                          | 146.0(1)                                          | 146.7(1)                                          |
| O2-Metal-O3                                          | 146.6(1)                                          | 76.7(1)                                           | 76.4(1)                                           |
| C3-P1-Metal                                          | 175.2(2)                                          | 173.9(1)                                          | 176.2(2)                                          |
| C1-N1-Metal                                          | 115.0(3)                                          | 115.0(2)                                          | 115.8(3)                                          |
| C2-N2-Metal                                          | 120.1(3)                                          | 120.7(3)                                          | 119.5(3)                                          |
| C7-N1-Metal                                          | 127.9(3)                                          | 126.5(3)                                          | 127.7(3)                                          |
| C15-N2-Metal                                         | 125.6(3)                                          | 122.5(3)                                          | 125.7(3)                                          |
| N1-C1-P1                                             | 107.0(3)                                          | 107.7(3)                                          | 106.9(3)                                          |
| N2-C2-P1                                             | 104.5(3)                                          | 105.4(3)                                          | 105.8(3)                                          |
| C1-N1-C7                                             | 115.0(4)                                          | 115.5(3)                                          | 115.1(3)                                          |
| C2-N2-C15                                            | 114.3(4)                                          | 116.8(3)                                          | 114.8(4)                                          |
| C1-P1-C2                                             | 100.5(2)                                          | 101.0(2)                                          | 100.2(2)                                          |
| C1-P1-C3                                             | 104.0(2)                                          | 103.9(2)                                          | 103.7(2)                                          |
| C2-P1-C3                                             | 105.6(2)                                          | 106.1(2)                                          | 106.3(2)                                          |

\* Atom labeling in the table refers to the graphic representation of the corresponding molecular structures elucidated from XRD analysis data. Please refer to corresponding figures (S42-S44) and tables in section 3 of the S.I. for the exact atom labeling, complete listing of bond distances and angles.

**Table S1b.** Comparative interatomic distances\* and angles for complexes  
 $M(\eta^5\text{-}(1,3\text{-diisopropyl-4,7-dimethylindenyl}))(\text{ArBiAMP}^{\text{tBu}})(\text{THF})_n$  ( $M = \text{Y(4)}$ ,  $n = 1$ ,  $\text{La(5)}$ ,  $n = 2$ ,  $\text{Lu(6)}$ ,  $n = 1$ )

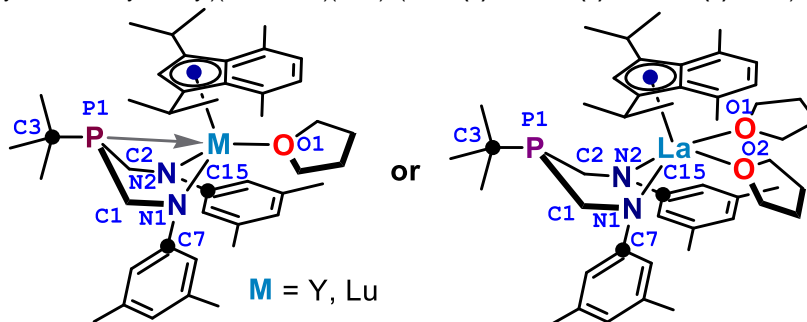

| Compound /                                                  | Y(Ind)( <sup>Ar</sup> BiAMP <sup>tBu</sup> )(THF) (4) | La(Ind)( <sup>Ar</sup> BiAMP <sup>tBu</sup> )(THF) <sub>2</sub> (5) | Lu(Ind)( <sup>Ar</sup> BiAMP <sup>tBu</sup> )(THF) (6) |
|-------------------------------------------------------------|-------------------------------------------------------|---------------------------------------------------------------------|--------------------------------------------------------|
| <b>Atom<sup>1</sup>-Atom<sup>2</sup>**</b>                  | <b>Selected distances, Å</b>                          |                                                                     |                                                        |
| Metal-P1                                                    | 2.886(6)                                              | 3.658(1)                                                            | 2.858(8)                                               |
| Metal-( $\eta^5$ -Ind) centroid                             | 2.389(1)                                              | 2.645(2)                                                            | 2.343(1)                                               |
| Metal-N1                                                    | 2.267(2)                                              | 2.388(2)                                                            | 2.203(3)                                               |
| Metal-N2                                                    | 2.238(2)                                              | 2.388(2)                                                            | 2.225(3)                                               |
| Metal-O1                                                    | 2.319(1)                                              | 2.610(4)                                                            | 2.264(2)                                               |
| Metal-O2                                                    | N/A                                                   | 2.674(3)                                                            | N/A                                                    |
| P1-C1                                                       | 1.851(2)                                              | 1.857(3)                                                            | 1.851(3)                                               |
| P1-C2                                                       | 1.855(2)                                              | 1.857(3)                                                            | 1.850(3)                                               |
| P1-C3                                                       | 1.858(2)                                              | 1.878(5)                                                            | 1.859(3)                                               |
| N1-C1                                                       | 1.463(3)                                              | 1.459(4)                                                            | 1.473(4)                                               |
| N1-C7                                                       | 1.387(3)                                              | 1.374(4)                                                            | 1.380(4)                                               |
| N2-C2                                                       | 1.465(3)                                              | 1.459(4)                                                            | 1.467(4)                                               |
| N2-C15                                                      | 1.377(3)                                              | 1.374(4)                                                            | 1.371(4)                                               |
| <b>Atom<sup>1</sup>-Atom<sup>2</sup>-Atom<sup>3</sup>**</b> | <b>Selected angles, °</b>                             |                                                                     |                                                        |
| ( $\eta^5$ -Ind) centroid -Metal-P1                         | 111.0(3)                                              | N/A                                                                 | 111.3(4)                                               |
| ( $\eta^5$ -Ind) centroid -Metal-N1                         | 124.2(6)                                              | 108.7(7)                                                            | 127.3(8)                                               |
| ( $\eta^5$ -Ind) centroid -Metal-N2                         | 127.5(6)                                              | 108.7(7)                                                            | 124.2(8)                                               |
| ( $\eta^5$ -Ind) centroid -Metal-O1                         | 119.2(5)                                              | 99.3(8)                                                             | 118.5(6)                                               |
| ( $\eta^5$ -Ind) centroid -Metal-O2                         | N/A                                                   | 167.4(7)                                                            | N/A                                                    |
| N1-Metal-P1                                                 | 60.4(5)                                               | N/A                                                                 | 60.9(7)                                                |
| N2-Metal-P1                                                 | 60.1(5)                                               | N/A                                                                 | 61.3(7)                                                |
| O1-Metal-P1                                                 | 129.8(4)                                              | N/A                                                                 | 130.1(6)                                               |
| O2-Metal-P1                                                 | N/A                                                   | N/A                                                                 | N/A                                                    |
| C3-P1-Metal                                                 | 169.5(7)                                              | N/A                                                                 | 170.5(1)                                               |
| C1-N1-Metal                                                 | 113.5(1)                                              | 127.8(2)                                                            | 113.0(2)                                               |
| C2-N2-Metal                                                 | 113.4(1)                                              | 127.8(2)                                                            | 113.3(2)                                               |
| C7-N1-Metal                                                 | 131.1(1)                                              | 112.7(2)                                                            | 128.1(2)                                               |
| C15-N2-Metal                                                | 127.4(1)                                              | 112.7(2)                                                            | 131.3(2)                                               |
| N1-C1-P1                                                    | 105.5(1)                                              | 109.2(2)                                                            | 103.8(2)                                               |
| N2-C2-P1                                                    | 103.9(1)                                              | 109.2(2)                                                            | 105.4(2)                                               |
| C1-N1-C7                                                    | 115.4(2)                                              | 115.7(3)                                                            | 117.3(3)                                               |
| C2-N2-C15                                                   | 117.3(2)                                              | 115.7(3)                                                            | 115.4(3)                                               |
| C1-P1-C2                                                    | 103.5(1)                                              | 98.8(2)                                                             | 103.5(1)                                               |
| C1-P1-C3                                                    | 105.6(1)                                              | 102.8(1)                                                            | 107.0(1)                                               |
| C2-P1-C3                                                    | 107.4(1)                                              | 102.8(1)                                                            | 105.6(2)                                               |

\* We used term 'interatomic distances' rather than 'bond lengths' in the table to compare directly the complexes of Y(4) and Lu(6) to the complex of La(5) where no coordination of the phosphorus atom to La was observed.

\*\* Atom labeling in the table refers to the graphic representation of the corresponding molecular structures elucidated from XRD analysis data. Please refer to corresponding figures (S45, S46, S47) and tables in section 3 of the S.I. for the exact atom labeling, complete listing of bond distances and angles.

N/A – not applicable.

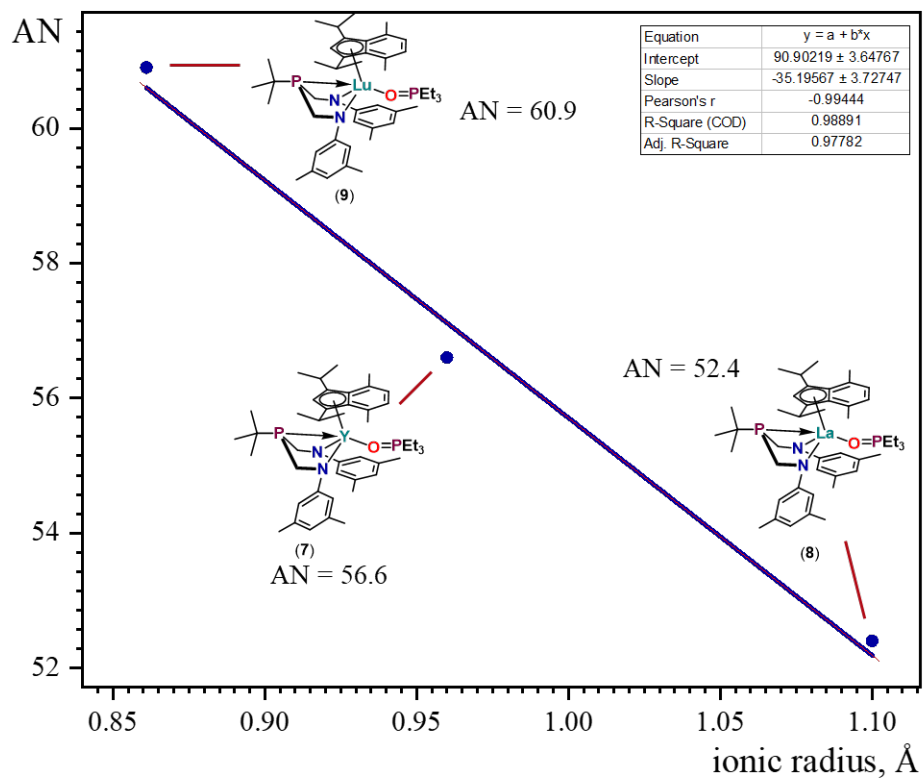

**Graph S1.** A correlation between the experimentally derived Gutmann-Beckett acceptor numbers (AN) and the effective ionic radii of the corresponding  $M^{3+}$  TEPO adducts (7-9).

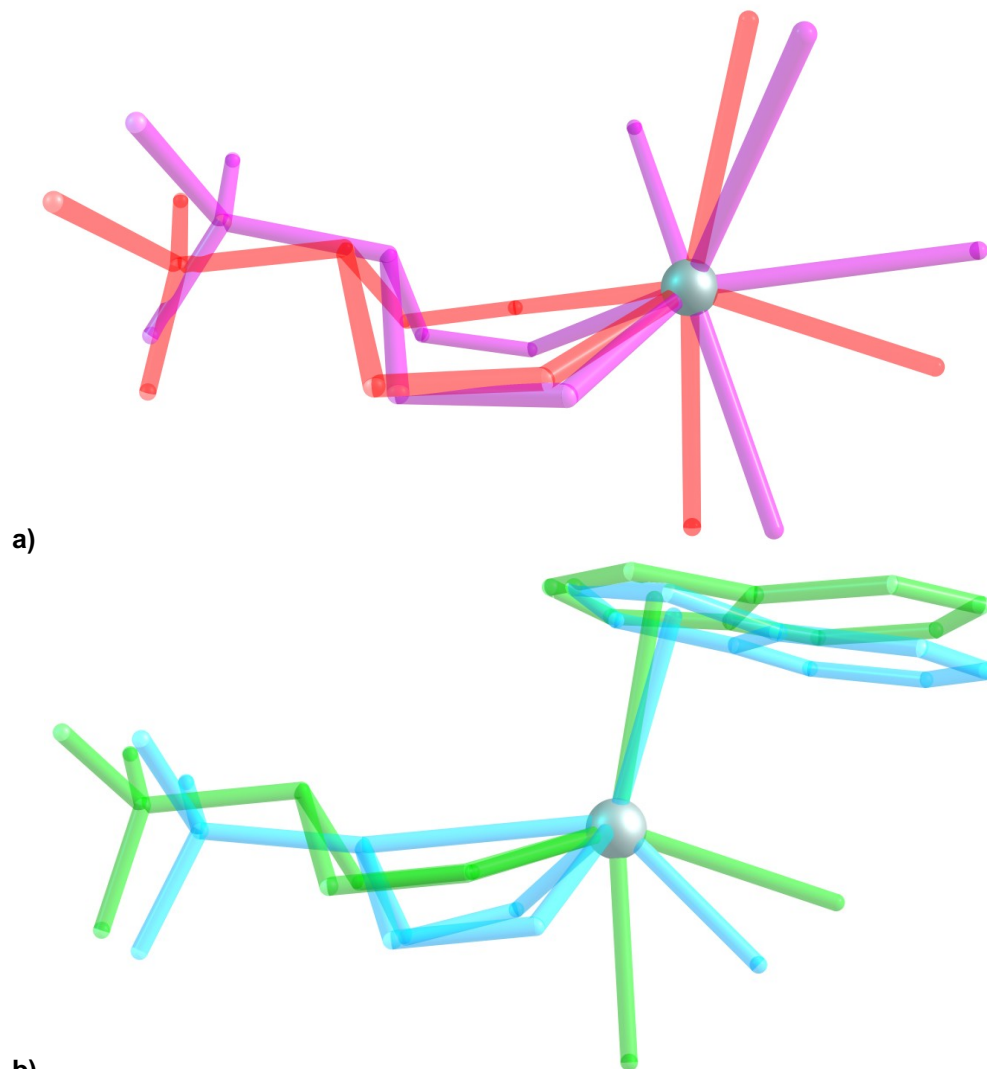

**a)**  
**b)**  
**Figure S51.** a) Solid state structural overlays of **2** (purple) and **5** (red) highlighting the differences observed at the La-center upon substitution of the *I*- ligand with  $\eta^5\text{-}i\text{PrMeInd}$ ; b) Solid state structural overlays of **4** (blue) and **5** (green) highlighting the geometric difference of the La-based complex.

### 3. Single Crystal X-ray Diffraction Data

#### 3.1. CCDC deposition numbers 2328028-2328036

$^{\text{Ar}}\text{BiAMP}^{\text{tBu}}$  : **2328028**

$(^{\text{Ar}}\text{BiAMP}^{\text{tBu}})\text{CH}_2$  : **2328029**

$\text{Yl}(^{\text{Ar}}\text{BiAMP}^{\text{tBu}})(\text{thf})_3$  (1) : **2328030**

$\text{La}(\text{ArBiAMP}^{\text{tBu}})(\text{thf})_3$  (2) : **2328031**

$\text{Lu}(\text{ArBiAMP}^{\text{tBu}})(\text{thf})_3$  (3) : **2328032**

$\text{Y}(\eta^5\text{-}(1,3\text{-diisopropyl-4,7-dimethylindenyl})(^{\text{Ar}}\text{BiAMP}^{\text{tBu}})(\text{thf})$  (4) : **2328033**

$\text{Y}(\eta^5\text{-}(1,3\text{-diisopropyl-4,7-dimethylindenyl})(^{\text{Ar}}\text{BiAMP}^{\text{tBu}})(\text{thf})(\text{Et}_2\text{O})$  (4a) : **2328034**

$\text{La}(\eta^5\text{-}(1,3\text{-diisopropyl-4,7-dimethylindenyl})(^{\text{Ar}}\text{BiAMP}^{\text{tBu}})(\text{thf})_2$  (5) : **2328035**

$\text{Lu}(\eta^5\text{-}(1,3\text{-diisopropyl-4,7-dimethylindenyl})(^{\text{Ar}}\text{BiAMP}^{\text{tBu}})(\text{thf})$  (6) : **2328036**

3.2. **ArBiAMP<sup>tBu</sup>**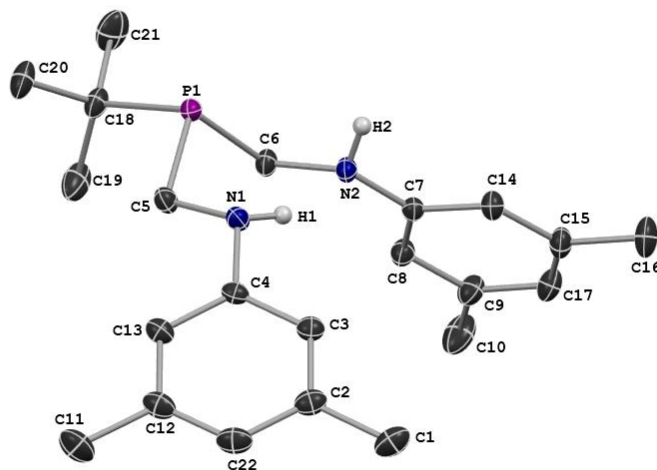

**Figure S52.** Solid state molecular structure of **ArBiAMP<sup>tBu</sup>** (recrystallized from *n*-pentane) shown with non-relevant hydrogen atoms omitted for clarity and the thermal ellipsoids set at 50% probability.

**Table S2.** Crystal data and structure refinement for **ArBiAMP<sup>tBu</sup>**.

|                                             |                                                               |
|---------------------------------------------|---------------------------------------------------------------|
| Empirical formula                           | C <sub>22</sub> H <sub>33</sub> N <sub>2</sub> P              |
| Formula weight                              | 356.47                                                        |
| Temperature/K                               | 109.0                                                         |
| Crystal system                              | triclinic                                                     |
| Space group                                 | P-1                                                           |
| a/Å                                         | 8.9968(3)                                                     |
| b/Å                                         | 11.2118(4)                                                    |
| c/Å                                         | 11.8000(5)                                                    |
| $\alpha$ /°                                 | 97.9300(10)                                                   |
| $\beta$ /°                                  | 103.0220(10)                                                  |
| $\gamma$ /°                                 | 108.0500(10)                                                  |
| Volume/Å <sup>3</sup>                       | 1074.49(7)                                                    |
| Z                                           | 2                                                             |
| $\rho_{\text{calc}}$ /cm <sup>3</sup>       | 1.102                                                         |
| $\mu$ /mm <sup>-1</sup>                     | 0.135                                                         |
| F(000)                                      | 388.0                                                         |
| Crystal size/mm <sup>3</sup>                | 0.35 × 0.35 × 0.3                                             |
| Radiation                                   | MoK $\alpha$ ( $\lambda$ = 0.71073)                           |
| 2 $\theta$ range for data collection/°      | 5.128 to 62.74                                                |
| Index ranges                                | -13 ≤ h ≤ 13, -16 ≤ k ≤ 16, -17 ≤ l ≤ 17                      |
| Reflections collected                       | 23544                                                         |
| Independent reflections                     | 6992 [R <sub>int</sub> = 0.0183, R <sub>sigma</sub> = 0.0175] |
| Data/restraints/parameters                  | 6992/0/241                                                    |
| Goodness-of-fit on F <sup>2</sup>           | 1.061                                                         |
| Final R indexes [ $ I  \geq 2\sigma(I)$ ]   | R <sub>1</sub> = 0.0374, wR <sub>2</sub> = 0.1031             |
| Final R indexes [all data]                  | R <sub>1</sub> = 0.0402, wR <sub>2</sub> = 0.1052             |
| Largest diff. peak/hole / e Å <sup>-3</sup> | 0.49/-0.32                                                    |



**Table S3.** Bond Lengths for <sup>Ar</sup>BiAMP<sup>tBu</sup>.

| Atom | Atom | Length/Å   | Atom | Atom | Length/Å   |
|------|------|------------|------|------|------------|
| P1   | C5   | 1.8526(9)  | C7   | C14  | 1.4025(12) |
| P1   | C6   | 1.8556(9)  | C8   | C9   | 1.3972(13) |
| P1   | C18  | 1.8708(9)  | C9   | C10  | 1.5054(15) |
| N1   | C4   | 1.4079(11) | C9   | C17  | 1.3895(14) |
| N1   | C5   | 1.4631(11) | C11  | C12  | 1.5074(14) |
| N2   | C6   | 1.4569(11) | C12  | C13  | 1.3947(13) |
| N2   | C7   | 1.3999(11) | C12  | C22  | 1.3906(15) |
| C1   | C2   | 1.5089(15) | C14  | C15  | 1.3864(13) |
| C2   | C3   | 1.3902(13) | C15  | C16  | 1.5083(14) |
| C2   | C22  | 1.3974(15) | C15  | C17  | 1.3963(14) |
| C3   | C4   | 1.4006(12) | C18  | C19  | 1.5247(14) |
| C4   | C13  | 1.3956(12) | C18  | C20  | 1.5345(14) |
| C7   | C8   | 1.3956(12) | C18  | C21  | 1.5399(16) |

**Table S4.** Bond Angles for <sup>Ar</sup>BiAMP<sup>tBu</sup>.

| Atom | Atom | Atom | Angle/°   | Atom | Atom | Atom | Angle/°    |
|------|------|------|-----------|------|------|------|------------|
| C5   | P1   | C6   | 98.13(4)  | C17  | C9   | C8   | 119.38(9)  |
| C5   | P1   | C18  | 102.10(4) | C17  | C9   | C10  | 120.88(9)  |
| C6   | P1   | C18  | 101.56(4) | C13  | C12  | C11  | 119.40(10) |
| C4   | N1   | C5   | 117.51(7) | C22  | C12  | C11  | 121.27(9)  |
| C7   | N2   | C6   | 119.15(7) | C22  | C12  | C13  | 119.33(9)  |
| C3   | C2   | C1   | 119.85(9) | C12  | C13  | C4   | 120.58(9)  |
| C3   | C2   | C22  | 119.33(9) | C15  | C14  | C7   | 120.98(9)  |
| C22  | C2   | C1   | 120.79(9) | C14  | C15  | C16  | 120.44(9)  |
| C2   | C3   | C4   | 120.52(9) | C14  | C15  | C17  | 119.23(9)  |
| C3   | C4   | N1   | 118.94(8) | C17  | C15  | C16  | 120.33(9)  |
| C13  | C4   | N1   | 121.71(8) | C9   | C17  | C15  | 120.85(9)  |
| C13  | C4   | C3   | 119.35(8) | C19  | C18  | P1   | 115.11(7)  |
| N1   | C5   | P1   | 109.23(6) | C19  | C18  | C20  | 109.92(9)  |
| N2   | C6   | P1   | 108.91(6) | C19  | C18  | C21  | 109.22(10) |
| N2   | C7   | C14  | 118.52(8) | C20  | C18  | P1   | 107.35(7)  |
| C8   | C7   | N2   | 122.56(8) | C20  | C18  | C21  | 108.79(9)  |
| C8   | C7   | C14  | 118.91(8) | C21  | C18  | P1   | 106.25(7)  |
| C7   | C8   | C9   | 120.64(8) | C12  | C22  | C2   | 120.87(9)  |
| C8   | C9   | C10  | 119.72(9) |      |      |      |            |

3.3 (<sup>Ar</sup>BiAMP<sup>tBu</sup>)CH<sub>2</sub>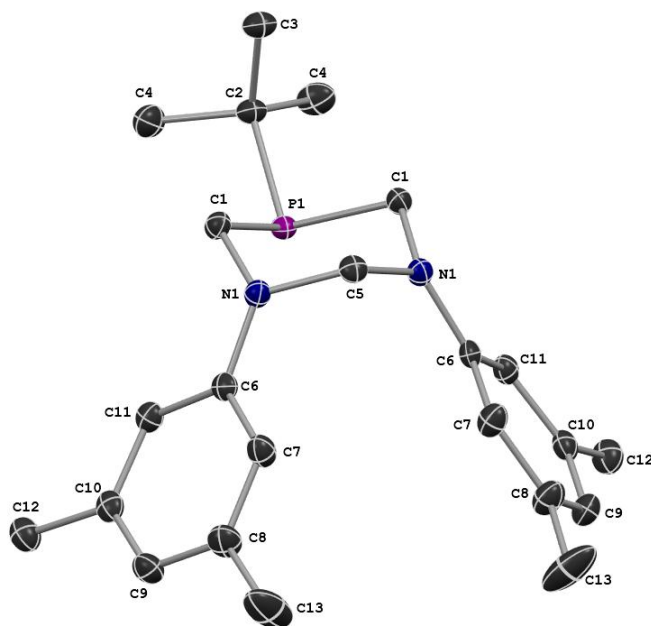

**Figure S53.** Solid state molecular structure of (<sup>Ar</sup>BiAMP<sup>tBu</sup>)CH<sub>2</sub> (recrystallized from *n*-pentane) shown with hydrogen atoms omitted for clarity and the thermal ellipsoids set at 50% probability.

**Table S5.** Crystal data and structure refinement for (<sup>Ar</sup>BiAMP<sup>tBu</sup>)CH<sub>2</sub>.

|                                                              |                                                                              |
|--------------------------------------------------------------|------------------------------------------------------------------------------|
| Empirical formula                                            | C <sub>23</sub> H <sub>33</sub> N <sub>2</sub> P                             |
| Formula weight                                               | 368.48                                                                       |
| Temperature/K                                                | 108.0                                                                        |
| Crystal system                                               | orthorhombic                                                                 |
| Space group                                                  | Pnma                                                                         |
| <i>a</i> /Å                                                  | 9.9418(8)                                                                    |
| <i>b</i> /Å                                                  | 16.3863(10)                                                                  |
| <i>c</i> /Å                                                  | 13.0368(9)                                                                   |
| <i>α</i> /°                                                  | 90                                                                           |
| <i>β</i> /°                                                  | 90                                                                           |
| <i>γ</i> /°                                                  | 90                                                                           |
| Volume/Å <sup>3</sup>                                        | 2123.8(3)                                                                    |
| <i>Z</i>                                                     | 4                                                                            |
| $\rho_{\text{calc}}$ /cm <sup>3</sup>                        | 1.152                                                                        |
| $\mu$ /mm <sup>-1</sup>                                      | 0.138                                                                        |
| <i>F</i> (000)                                               | 800.0                                                                        |
| Crystal size/mm <sup>3</sup>                                 | 0.42 × 0.12 × 0.09                                                           |
| Radiation                                                    | MoK $\alpha$ ( $\lambda$ = 0.71073)                                          |
| 2 $\theta$ range for data collection/°                       | 4.972 to 56.04                                                               |
| Index ranges                                                 | -12 ≤ <i>h</i> ≤ 13, -21 ≤ <i>k</i> ≤ 21, -12 ≤ <i>l</i> ≤ 17                |
| Reflections collected                                        | 11477                                                                        |
| Independent reflections                                      | 2630 [ <i>R</i> <sub>int</sub> = 0.0409, <i>R</i> <sub>sigma</sub> = 0.0342] |
| Data/restraints/parameters                                   | 2630/0/128                                                                   |
| Goodness-of-fit on <i>F</i> <sup>2</sup>                     | 1.080                                                                        |
| Final <i>R</i> indexes [ <i>I</i> ≥ 2 $\sigma$ ( <i>I</i> )] | <i>R</i> <sub>1</sub> = 0.0521, <i>wR</i> <sub>2</sub> = 0.1163              |
| Final <i>R</i> indexes [all data]                            | <i>R</i> <sub>1</sub> = 0.0622, <i>wR</i> <sub>2</sub> = 0.1209              |
| Largest diff. peak/hole / e Å <sup>-3</sup>                  | 0.41/-0.37                                                                   |

**Table S6.** Bond Lengths for (<sup>Ar</sup>BiAMP<sup>tBu</sup>)CH<sub>2</sub>.

| Atom | Atom            | Length/Å   | Atom | Atom            | Length/Å |
|------|-----------------|------------|------|-----------------|----------|
| P1   | C2              | 1.879(2)   | C2   | C3              | 1.529(3) |
| P1   | C1 <sup>1</sup> | 1.8748(17) | C2   | C4              | 1.537(2) |
| P1   | C1              | 1.8749(17) | C2   | C4 <sup>1</sup> | 1.537(2) |
| N1   | C5              | 1.4576(19) | C7   | C8              | 1.387(2) |
| N1   | C6              | 1.398(2)   | C10  | C9              | 1.392(2) |
| N1   | C1              | 1.456(2)   | C10  | C12             | 1.507(2) |
| C6   | C11             | 1.403(2)   | C9   | C8              | 1.392(3) |
| C6   | C7              | 1.406(2)   | C8   | C13             | 1.513(3) |
| C11  | C10             | 1.395(2)   |      |                 |          |

**Table S7.** Bond Angles for (<sup>Ar</sup>BiAMP<sup>tBu</sup>)CH<sub>2</sub>.

| Atom            | Atom | Atom | Angle/°    | Atom            | Atom | Atom            | Angle/°    |
|-----------------|------|------|------------|-----------------|------|-----------------|------------|
| C1 <sup>1</sup> | P1   | C2   | 102.97(8)  | C3              | C2   | C4 <sup>1</sup> | 109.22(14) |
| C1              | P1   | C2   | 102.97(8)  | C4              | C2   | P1              | 106.48(12) |
| C1 <sup>1</sup> | P1   | C1   | 92.88(11)  | C4 <sup>1</sup> | C2   | P1              | 106.48(12) |
| C6              | N1   | C5   | 121.93(15) | C4 <sup>1</sup> | C2   | C4              | 109.2(2)   |
| C6              | N1   | C1   | 121.28(14) | N1              | C1   | P1              | 110.36(11) |
| C1              | N1   | C5   | 111.90(15) | C8              | C7   | C6              | 121.24(17) |
| N1 <sup>1</sup> | C5   | N1   | 113.26(19) | C11             | C10  | C12             | 120.06(16) |
| N1              | C6   | C11  | 121.61(15) | C9              | C10  | C11             | 119.46(16) |
| N1              | C6   | C7   | 120.46(15) | C9              | C10  | C12             | 120.47(16) |
| C11             | C6   | C7   | 117.76(16) | C8              | C9   | C10             | 120.28(17) |
| C10             | C11  | C6   | 121.31(16) | C7              | C8   | C9              | 119.86(17) |
| C3              | C2   | P1   | 116.07(17) | C7              | C8   | C13             | 119.56(18) |
| C3              | C2   | C4   | 109.22(13) | C9              | C8   | C13             | 120.58(17) |

3.4  $YI(ArBiAMP^{tBu})(THF)_3$  (1)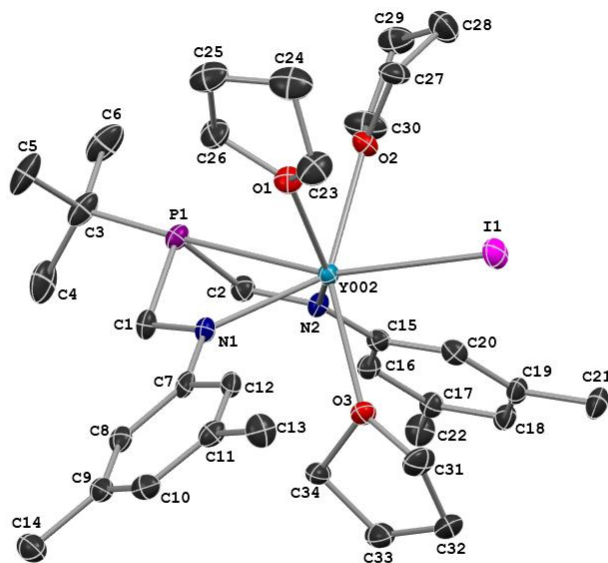

**Figure S54.** Solid state molecular structure of  $YI(ArBiAMP^{tBu})(THF)_3$  (1) (recrystallized from THF/n-pentane) shown with hydrogen atoms omitted for clarity and the thermal ellipsoids set at 50% probability.

**Table S8.** Crystal data and structure refinement for  $YI(ArBiAMP^{tBu})(THF)_3$  (1).

|                                                |                                                     |
|------------------------------------------------|-----------------------------------------------------|
| Empirical formula                              | $C_{34}H_{55}IN_2O_3PY$                             |
| Formula weight                                 | 786.58                                              |
| Temperature/K                                  | 100.0                                               |
| Crystal system                                 | orthorhombic                                        |
| Space group                                    | $P2_12_12_1$                                        |
| a/Å                                            | 13.453(9)                                           |
| b/Å                                            | 14.372(15)                                          |
| c/Å                                            | 19.53(3)                                            |
| $\alpha/^\circ$                                | 90                                                  |
| $\beta/^\circ$                                 | 90                                                  |
| $\gamma/^\circ$                                | 90                                                  |
| Volume/Å <sup>3</sup>                          | 3776(7)                                             |
| Z                                              | 4                                                   |
| $\rho_{calc}/cm^3$                             | 1.384                                               |
| $\mu/mm^{-1}$                                  | 2.437                                               |
| F(000)                                         | 1616.0                                              |
| Crystal size/mm <sup>3</sup>                   | 0.34 × 0.28 × 0.22                                  |
| Radiation                                      | MoK $\alpha$ ( $\lambda = 0.71073$ )                |
| 2 $\theta$ range for data collection/ $^\circ$ | 4.642 to 56.858                                     |
| Index ranges                                   | -18 ≤ h ≤ 16, -19 ≤ k ≤ 19, -23 ≤ l ≤ 25            |
| Reflections collected                          | 32996                                               |
| Independent reflections                        | 9281 [ $R_{int} = 0.0518$ , $R_{\sigma} = 0.0509$ ] |
| Data/restraints/parameters                     | 9281/0/387                                          |
| Goodness-of-fit on $F^2$                       | 1.052                                               |
| Final R indexes [ $I \geq 2\sigma(I)$ ]        | $R_1 = 0.0340$ , $wR_2 = 0.0761$                    |
| Final R indexes [all data]                     | $R_1 = 0.0407$ , $wR_2 = 0.0780$                    |
| Largest diff. peak/hole / e Å <sup>-3</sup>    | 1.80/-0.53                                          |
| Flack parameter                                | 0.426(6)                                            |

**Table S9.** Bond Lengths for  $\text{Yl}(\text{ArBiAMP}^{\text{tBu}})(\text{THF})_3$  (1).

| Atom | Atom | Length/Å   | Atom | Atom | Length/Å |
|------|------|------------|------|------|----------|
| I1   | Y002 | 3.1192(18) | C17  | C18  | 1.392(6) |
| Y002 | P1   | 3.124(2)   | C27  | C28  | 1.523(7) |
| Y002 | O1   | 2.456(4)   | C26  | C25  | 1.567(7) |
| Y002 | O2   | 2.427(4)   | C15  | C16  | 1.434(7) |
| Y002 | O3   | 2.395(4)   | C15  | C20  | 1.424(6) |
| Y002 | N1   | 2.296(4)   | C18  | C19  | 1.434(7) |
| Y002 | N2   | 2.330(5)   | C34  | C33  | 1.525(7) |
| P1   | C1   | 1.863(5)   | C14  | C9   | 1.526(7) |
| P1   | C2   | 1.874(5)   | C9   | C10  | 1.398(7) |
| P1   | C3   | 1.883(5)   | C9   | C8   | 1.394(7) |
| O1   | C26  | 1.459(6)   | C28  | C29  | 1.549(8) |
| O1   | C23  | 1.472(6)   | C7   | C8   | 1.413(7) |
| O2   | C27  | 1.483(6)   | C21  | C19  | 1.514(6) |
| O2   | C30  | 1.477(7)   | C30  | C29  | 1.510(8) |
| O3   | C34  | 1.477(6)   | C10  | C11  | 1.418(7) |
| O3   | C31  | 1.455(6)   | C11  | C13  | 1.539(7) |
| N1   | C1   | 1.485(6)   | C20  | C19  | 1.409(7) |
| N1   | C7   | 1.397(6)   | C3   | C6   | 1.540(8) |
| N2   | C2   | 1.476(6)   | C3   | C5   | 1.546(7) |
| N2   | C15  | 1.402(6)   | C3   | C4   | 1.552(8) |
| C12  | C7   | 1.436(7)   | C23  | C24  | 1.507(8) |
| C12  | C11  | 1.386(7)   | C33  | C32  | 1.548(8) |
| C17  | C22  | 1.529(7)   | C31  | C32  | 1.545(8) |
| C17  | C16  | 1.413(6)   | C25  | C24  | 1.520(9) |

**Table S10.** Bond Angles for  $\text{Yl}(\text{ArBiAMP}^{\text{tBu}})(\text{THF})_3$  (1).

| Atom | Atom | Atom | Angle/°    | Atom | Atom | Atom | Angle/°  |
|------|------|------|------------|------|------|------|----------|
| I1   | Y002 | P1   | 160.44(4)  | C16  | C17  | C22  | 120.9(4) |
| O1   | Y002 | I1   | 81.75(10)  | C18  | C17  | C22  | 120.0(4) |
| O1   | Y002 | P1   | 93.15(11)  | C18  | C17  | C16  | 119.0(4) |
| O2   | Y002 | I1   | 80.93(8)   | O2   | C27  | C28  | 103.9(4) |
| O2   | Y002 | P1   | 79.51(8)   | N1   | C1   | P1   | 107.0(3) |
| O2   | Y002 | O1   | 76.60(12)  | N2   | C2   | P1   | 104.5(3) |
| O3   | Y002 | I1   | 81.48(9)   | O1   | C26  | C25  | 106.2(4) |
| O3   | Y002 | P1   | 115.79(9)  | N2   | C15  | C16  | 125.5(4) |
| O3   | Y002 | O1   | 128.22(11) | N2   | C15  | C20  | 117.4(4) |
| O3   | Y002 | O2   | 146.63(12) | C20  | C15  | C16  | 117.1(4) |
| N1   | Y002 | I1   | 139.56(10) | C17  | C16  | C15  | 122.5(4) |
| N1   | Y002 | P1   | 57.36(10)  | C17  | C18  | C19  | 120.4(4) |
| N1   | Y002 | O1   | 83.04(13)  | O3   | C34  | C33  | 105.7(4) |
| N1   | Y002 | O2   | 130.90(13) | C10  | C9   | C14  | 120.6(4) |
| N1   | Y002 | O3   | 79.06(14)  | C8   | C9   | C14  | 118.7(5) |
| N1   | Y002 | N2   | 91.67(14)  | C8   | C9   | C10  | 120.7(4) |
| N2   | Y002 | I1   | 121.05(10) | C27  | C28  | C29  | 102.8(4) |
| N2   | Y002 | P1   | 56.16(9)   | N1   | C7   | C12  | 118.8(4) |
| N2   | Y002 | O1   | 145.12(13) | N1   | C7   | C8   | 124.2(4) |
| N2   | Y002 | O2   | 81.29(13)  | C8   | C7   | C12  | 117.0(4) |
| N2   | Y002 | O3   | 83.85(13)  | O2   | C30  | C29  | 107.0(5) |
| C1   | P1   | Y002 | 75.71(15)  | C9   | C10  | C11  | 120.0(4) |
| C1   | P1   | C2   | 100.5(2)   | C12  | C11  | C10  | 118.8(5) |
| C1   | P1   | C3   | 104.0(2)   | C12  | C11  | C13  | 121.2(5) |
| C2   | P1   | Y002 | 79.07(17)  | C10  | C11  | C13  | 120.0(4) |
| C2   | P1   | C3   | 105.6(2)   | C9   | C8   | C7   | 121.1(5) |
| C3   | P1   | Y002 | 175.21(17) | C19  | C20  | C15  | 121.0(4) |
| C26  | O1   | Y002 | 118.8(3)   | C18  | C19  | C21  | 120.6(4) |
| C26  | O1   | C23  | 106.8(4)   | C20  | C19  | C18  | 120.0(4) |
| C23  | O1   | Y002 | 133.2(3)   | C20  | C19  | C21  | 119.4(4) |
| C27  | O2   | Y002 | 127.1(3)   | C6   | C3   | P1   | 107.6(4) |
| C30  | O2   | Y002 | 123.7(3)   | C6   | C3   | C5   | 108.9(5) |
| C30  | O2   | C27  | 109.0(4)   | C6   | C3   | C4   | 110.6(5) |
| C34  | O3   | Y002 | 119.0(3)   | C5   | C3   | P1   | 106.1(4) |
| C31  | O3   | Y002 | 137.4(3)   | C5   | C3   | C4   | 110.3(5) |
| C31  | O3   | C34  | 103.5(3)   | C4   | C3   | P1   | 113.2(4) |
| C1   | N1   | Y002 | 115.0(3)   | O1   | C23  | C24  | 105.0(4) |
| C7   | N1   | Y002 | 127.9(3)   | C30  | C29  | C28  | 103.3(4) |
| C7   | N1   | C1   | 115.0(4)   | C34  | C33  | C32  | 103.8(4) |
| C2   | N2   | Y002 | 120.1(3)   | O3   | C31  | C32  | 104.4(4) |
| C15  | N2   | Y002 | 125.6(3)   | C24  | C25  | C26  | 104.1(4) |
| C15  | N2   | C2   | 114.3(4)   | C23  | C24  | C25  | 101.9(5) |
| C11  | C12  | C7   | 122.3(4)   | C31  | C32  | C33  | 104.7(4) |

3.5  $\text{La}(\text{ArBiAMP}^{\text{tBu}})(\text{THF})_3$  (**2**)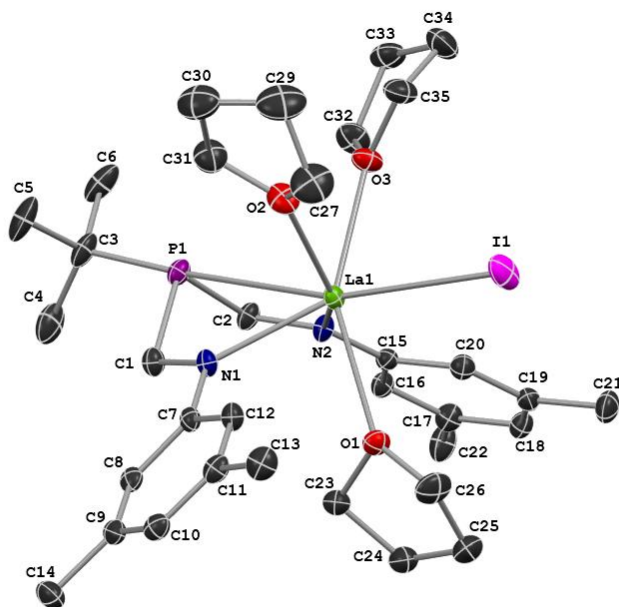

**Figure S55.** Solid state molecular structure of  $\text{La}(\text{ArBiAMP}^{\text{tBu}})(\text{THF})_3$  (**2**) (recrystallized from THF/*n*-pentane) shown with hydrogen atoms omitted for clarity and the thermal ellipsoids set at 50% probability.

**Table S11.** Crystal data and structure refinement for  $\text{La}(\text{ArBiAMP}^{\text{tBu}})(\text{THF})_3$  (**2**).

|                                                              |                                                                              |
|--------------------------------------------------------------|------------------------------------------------------------------------------|
| Empirical formula                                            | $\text{C}_{34}\text{H}_{55}\text{LaN}_2\text{O}_3\text{P}$                   |
| Formula weight                                               | 836.58                                                                       |
| Temperature/K                                                | 100.0                                                                        |
| Crystal system                                               | orthorhombic                                                                 |
| Space group                                                  | $\text{P}2_12_12_1$                                                          |
| <i>a</i> /Å                                                  | 13.352(2)                                                                    |
| <i>b</i> /Å                                                  | 14.546(3)                                                                    |
| <i>c</i> /Å                                                  | 19.171(4)                                                                    |
| $\alpha$ /°                                                  | 90                                                                           |
| $\beta$ /°                                                   | 90                                                                           |
| $\gamma$ /°                                                  | 90                                                                           |
| Volume/Å <sup>3</sup>                                        | 3723.2(12)                                                                   |
| <i>Z</i>                                                     | 4                                                                            |
| $\rho_{\text{calc}}/\text{cm}^3$                             | 1.492                                                                        |
| $\mu/\text{mm}^{-1}$                                         | 2.052                                                                        |
| <i>F</i> (000)                                               | 1688.0                                                                       |
| Crystal size/mm <sup>3</sup>                                 | 0.24 × 0.18 × 0.16                                                           |
| Radiation                                                    | MoK $\alpha$ ( $\lambda$ = 0.71073)                                          |
| 2 $\theta$ range for data collection/°                       | 5.602 to 56.746                                                              |
| Index ranges                                                 | -17 ≤ <i>h</i> ≤ 17, -19 ≤ <i>k</i> ≤ 19, -25 ≤ <i>l</i> ≤ 25                |
| Reflections collected                                        | 63378                                                                        |
| Independent reflections                                      | 9274 [ <i>R</i> <sub>int</sub> = 0.0310, <i>R</i> <sub>sigma</sub> = 0.0202] |
| Data/restraints/parameters                                   | 9274/0/387                                                                   |
| Goodness-of-fit on <i>F</i> <sup>2</sup>                     | 1.060                                                                        |
| Final <i>R</i> indexes [ <i>I</i> ≥ 2 $\sigma$ ( <i>I</i> )] | <i>R</i> <sub>1</sub> = 0.0262, <i>wR</i> <sub>2</sub> = 0.0617              |
| Final <i>R</i> indexes [all data]                            | <i>R</i> <sub>1</sub> = 0.0264, <i>wR</i> <sub>2</sub> = 0.0619              |
| Largest diff. peak/hole / e Å <sup>-3</sup>                  | 3.47/-2.01                                                                   |
| Flack parameter                                              | 0.020(16)                                                                    |

**Table S12.** Bond Lengths for  $\text{La}(\text{ArBiAMP}^{\text{tBu}})(\text{THF})_3$  (2).

| Atom | Atom | Length/Å   | Atom | Atom | Length/Å  |
|------|------|------------|------|------|-----------|
| La1  | I1   | 3.2263(6)  | C17  | C16  | 1.395(6)  |
| La1  | P1   | 3.1918(11) | C24  | C25  | 1.533(8)  |
| La1  | O2   | 2.552(3)   | C24  | C23  | 1.521(6)  |
| La1  | O1   | 2.537(3)   | C11  | C12  | 1.381(6)  |
| La1  | O3   | 2.571(3)   | N1   | C1   | 1.453(5)  |
| La1  | N1   | 2.405(3)   | N1   | C7   | 1.378(5)  |
| La1  | N2   | 2.402(4)   | C19  | C18  | 1.401(6)  |
| P1   | C3   | 1.869(5)   | C19  | C21  | 1.507(6)  |
| P1   | C1   | 1.858(4)   | C19  | C20  | 1.377(6)  |
| P1   | C2   | 1.848(4)   | C25  | C26  | 1.512(8)  |
| O2   | C31  | 1.427(7)   | C8   | C9   | 1.389(6)  |
| O2   | C27  | 1.451(6)   | C8   | C7   | 1.407(6)  |
| O1   | C23  | 1.448(5)   | C14  | C9   | 1.506(6)  |
| O1   | C26  | 1.453(5)   | C12  | C7   | 1.415(6)  |
| O3   | C32  | 1.459(6)   | C33  | C34  | 1.517(8)  |
| O3   | C35  | 1.453(5)   | C33  | C32  | 1.505(7)  |
| C13  | C11  | 1.513(6)   | C34  | C35  | 1.518(7)  |
| C3   | C6   | 1.532(8)   | C2   | N2   | 1.460(5)  |
| C3   | C4   | 1.531(8)   | C16  | C15  | 1.413(6)  |
| C3   | C5   | 1.531(7)   | C31  | C30  | 1.550(7)  |
| C10  | C11  | 1.397(6)   | C20  | C15  | 1.417(6)  |
| C10  | C9   | 1.394(6)   | C30  | C29  | 1.512(10) |
| C17  | C22  | 1.503(6)   | C29  | C27  | 1.481(9)  |
| C17  | C18  | 1.387(6)   | N2   | C15  | 1.385(5)  |

**Table S13.** Bond Angles for  $\text{La}(\text{ArBiAMP}^{\text{tBu}})(\text{THF})_3$  (2).

| Atom | Atom | Atom | Angle/°    | Atom | Atom | Atom | Angle/°  |
|------|------|------|------------|------|------|------|----------|
| P1   | La1  | I1   | 163.20(2)  | C18  | C17  | C22  | 119.6(4) |
| O2   | La1  | I1   | 83.70(9)   | C18  | C17  | C16  | 120.2(4) |
| O2   | La1  | P1   | 92.20(9)   | C16  | C17  | C22  | 120.2(4) |
| O2   | La1  | O3   | 76.74(11)  | C23  | C24  | C25  | 104.2(4) |
| O1   | La1  | I1   | 80.65(7)   | C10  | C11  | C13  | 119.7(4) |
| O1   | La1  | P1   | 113.88(7)  | C12  | C11  | C13  | 120.6(4) |
| O1   | La1  | O2   | 130.13(11) | C12  | C11  | C10  | 119.7(4) |
| O1   | La1  | O3   | 146.05(11) | C1   | N1   | La1  | 115.0(2) |
| O3   | La1  | I1   | 82.96(7)   | C7   | N1   | La1  | 126.5(3) |
| O3   | La1  | P1   | 80.24(7)   | C7   | N1   | C1   | 115.5(3) |
| N1   | La1  | I1   | 139.91(8)  | C18  | C19  | C21  | 120.1(4) |
| N1   | La1  | P1   | 55.18(9)   | C20  | C19  | C18  | 119.2(4) |
| N1   | La1  | O2   | 84.41(12)  | C20  | C19  | C21  | 120.7(4) |
| N1   | La1  | O1   | 78.26(11)  | C26  | C25  | C24  | 104.7(4) |
| N1   | La1  | O3   | 130.71(11) | C9   | C8   | C7   | 121.4(4) |
| N2   | La1  | I1   | 122.66(8)  | O1   | C23  | C24  | 104.7(4) |
| N2   | La1  | P1   | 54.16(9)   | C17  | C18  | C19  | 120.2(4) |
| N2   | La1  | O2   | 141.70(13) | C11  | C12  | C7   | 122.1(4) |
| N2   | La1  | O1   | 84.63(11)  | C32  | C33  | C34  | 104.5(4) |
| N2   | La1  | O3   | 79.55(12)  | N1   | C1   | P1   | 107.7(3) |
| N2   | La1  | N1   | 88.82(12)  | C10  | C9   | C14  | 120.5(4) |
| C3   | P1   | La1  | 173.93(15) | C8   | C9   | C10  | 120.3(4) |
| C1   | P1   | La1  | 76.38(14)  | C8   | C9   | C14  | 119.1(4) |
| C1   | P1   | C3   | 103.9(2)   | C33  | C34  | C35  | 102.8(4) |
| C2   | P1   | La1  | 79.67(13)  | N2   | C2   | P1   | 105.4(3) |
| C2   | P1   | C3   | 106.1(2)   | C17  | C16  | C15  | 121.2(4) |
| C2   | P1   | C1   | 101.0(2)   | O2   | C31  | C30  | 105.6(5) |
| C31  | O2   | La1  | 119.9(3)   | C19  | C20  | C15  | 122.7(4) |
| C31  | O2   | C27  | 109.8(4)   | O3   | C32  | C33  | 106.9(4) |
| C27  | O2   | La1  | 129.8(3)   | C29  | C30  | C31  | 103.0(5) |
| C23  | O1   | La1  | 118.7(2)   | C27  | C29  | C30  | 103.2(5) |
| C23  | O1   | C26  | 104.2(3)   | N1   | C7   | C8   | 124.5(4) |
| C26  | O1   | La1  | 137.0(3)   | N1   | C7   | C12  | 118.6(4) |
| C32  | O3   | La1  | 124.6(3)   | C8   | C7   | C12  | 116.8(4) |



**Table S13 (Continued).** Bond Angles for  $\text{La}(\text{ArBiAMP}^{\text{tBu}})(\text{THF})_3$  (2).

| Atom | Atom | Atom | Angle/°  | Atom | Atom | Atom | Angle/°  |
|------|------|------|----------|------|------|------|----------|
| C35  | O3   | La1  | 126.6(3) | C2   | N2   | La1  | 120.7(3) |
| C35  | O3   | C32  | 108.8(3) | C15  | N2   | La1  | 122.5(3) |
| C6   | C3   | P1   | 107.8(4) | C15  | N2   | C2   | 116.8(3) |
| C4   | C3   | P1   | 112.9(3) | O3   | C35  | C34  | 104.2(4) |
| C4   | C3   | C6   | 110.4(4) | O1   | C26  | C25  | 104.6(4) |
| C5   | C3   | P1   | 107.2(3) | O2   | C27  | C29  | 104.0(5) |
| C5   | C3   | C6   | 108.5(4) | C16  | C15  | C20  | 116.5(4) |
| C5   | C3   | C4   | 109.9(5) | N2   | C15  | C16  | 124.9(4) |
| C9   | C10  | C11  | 119.6(4) | N2   | C15  | C20  | 118.6(4) |

3.6 LuI(ArBiAMP<sup>tBu</sup>)(THF)<sub>3</sub> (3)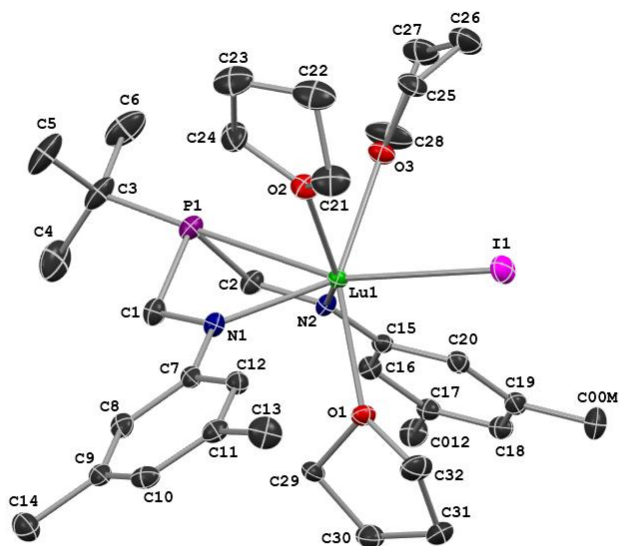

**Figure S56.** Solid state molecular structure of LuI(ArBiAMP<sup>tBu</sup>)(THF)<sub>3</sub> (3) (recrystallized from THF/n-pentane) shown with hydrogen atoms omitted for clarity and the thermal ellipsoids set at 50% probability.

**Table S14.** Crystal data and structure refinement for LuI(ArBiAMP<sup>tBu</sup>)(THF)<sub>3</sub> (3).

|                                             |                                                                    |
|---------------------------------------------|--------------------------------------------------------------------|
| Empirical formula                           | C <sub>34</sub> H <sub>55</sub> ILuN <sub>2</sub> O <sub>3</sub> P |
| Formula weight                              | 872.64                                                             |
| Temperature/K                               | 100.0                                                              |
| Crystal system                              | orthorhombic                                                       |
| Space group                                 | P2 <sub>1</sub> 2 <sub>1</sub> 2 <sub>1</sub>                      |
| a/Å                                         | 13.4115(9)                                                         |
| b/Å                                         | 14.1878(10)                                                        |
| c/Å                                         | 19.0912(14)                                                        |
| α/°                                         | 90                                                                 |
| β/°                                         | 90                                                                 |
| γ/°                                         | 90                                                                 |
| Volume/Å <sup>3</sup>                       | 3632.7(4)                                                          |
| Z                                           | 4                                                                  |
| ρ <sub>calc</sub> /cm <sup>3</sup>          | 1.596                                                              |
| μ/mm <sup>-1</sup>                          | 3.645                                                              |
| F(000)                                      | 1744.0                                                             |
| Crystal size/mm <sup>3</sup>                | 0.22 × 0.12 × 0.03                                                 |
| Radiation                                   | MoKα (λ = 0.71073)                                                 |
| 2θ range for data collection/°              | 6.126 to 56.67                                                     |
| Index ranges                                | -17 ≤ h ≤ 17, -17 ≤ k ≤ 18, -25 ≤ l ≤ 25                           |
| Reflections collected                       | 35210                                                              |
| Independent reflections                     | 9000 [R <sub>int</sub> = 0.0318, R <sub>sigma</sub> = 0.0295]      |
| Data/restraints/parameters                  | 9000/0/388                                                         |
| Goodness-of-fit on F <sup>2</sup>           | 1.126                                                              |
| Final R indexes [I ≥ 2σ (I)]                | R <sub>1</sub> = 0.0215, wR <sub>2</sub> = 0.0443                  |
| Final R indexes [all data]                  | R <sub>1</sub> = 0.0232, wR <sub>2</sub> = 0.0447                  |
| Largest diff. peak/hole / e Å <sup>-3</sup> | 0.96/-0.87                                                         |
| Flack parameter                             | 0.290(6)                                                           |

**Table S15.** Bond Lengths for  $\text{Lu}(\text{ArBiAMP}^{\text{tBu}})(\text{THF})_3$  (3).

| Atom | Atom | Length/Å   | Atom | Atom | Length/Å |
|------|------|------------|------|------|----------|
| Lu1  | I1   | 3.0456(4)  | C28  | C27  | 1.499(7) |
| Lu1  | P1   | 3.0766(12) | C19  | C00M | 1.509(6) |
| Lu1  | O1   | 2.330(3)   | C19  | C18  | 1.409(6) |
| Lu1  | O2   | 2.377(3)   | C30  | C31  | 1.526(7) |
| Lu1  | N2   | 2.239(4)   | C12  | C7   | 1.405(6) |
| Lu1  | O3   | 2.374(3)   | C12  | C11  | 1.389(6) |
| Lu1  | N1   | 2.244(3)   | C15  | C16  | 1.416(6) |
| P1   | C1   | 1.842(5)   | C7   | C8   | 1.410(6) |
| P1   | C2   | 1.841(5)   | C3   | C6   | 1.530(8) |
| P1   | C3   | 1.868(5)   | C3   | C4   | 1.522(8) |
| O1   | C29  | 1.470(5)   | C3   | C5   | 1.542(7) |
| O1   | C32  | 1.453(6)   | C25  | C26  | 1.510(7) |
| O2   | C24  | 1.450(6)   | C24  | C23  | 1.533(7) |
| O2   | C21  | 1.449(6)   | C8   | C9   | 1.384(7) |
| N2   | C2   | 1.465(6)   | C17  | C16  | 1.395(6) |
| N2   | C15  | 1.387(6)   | C17  | C18  | 1.377(6) |
| O3   | C28  | 1.447(6)   | C17  | C012 | 1.507(6) |
| O3   | C25  | 1.461(6)   | C27  | C26  | 1.518(8) |
| N1   | C1   | 1.465(6)   | C21  | C22  | 1.503(8) |
| N1   | C7   | 1.377(6)   | C14  | C9   | 1.517(6) |
| C20  | C19  | 1.373(6)   | C13  | C11  | 1.507(7) |
| C20  | C15  | 1.418(6)   | C9   | C10  | 1.377(7) |
| C29  | C30  | 1.511(6)   | C11  | C10  | 1.402(7) |
| C32  | C31  | 1.525(7)   | C23  | C22  | 1.516(9) |

**Table S16.** Bond Angles for  $\text{Lu}(\text{ArBiAMP}^{\text{tBu}})(\text{THF})_3$  (3).

| Atom | Atom | Atom | Angle/°    | Atom | Atom | Atom | Angle/°  |
|------|------|------|------------|------|------|------|----------|
| I1   | Lu1  | P1   | 159.25(2)  | N1   | C1   | P1   | 106.9(3) |
| O1   | Lu1  | I1   | 81.27(8)   | N2   | C2   | P1   | 105.8(3) |
| O1   | Lu1  | P1   | 117.29(8)  | O1   | C29  | C30  | 105.0(4) |
| O1   | Lu1  | O2   | 127.95(11) | O1   | C32  | C31  | 104.8(4) |
| O1   | Lu1  | O3   | 146.73(11) | O3   | C28  | C27  | 107.3(4) |
| O2   | Lu1  | I1   | 82.42(9)   | C20  | C19  | C00M | 120.6(4) |
| O2   | Lu1  | P1   | 91.83(9)   | C20  | C19  | C18  | 120.3(4) |
| N2   | Lu1  | I1   | 120.20(9)  | C18  | C19  | C00M | 119.1(4) |
| N2   | Lu1  | P1   | 57.13(9)   | C29  | C30  | C31  | 104.8(4) |
| N2   | Lu1  | O1   | 84.48(12)  | C11  | C12  | C7   | 122.6(4) |
| N2   | Lu1  | O2   | 144.84(13) | N2   | C15  | C20  | 118.9(4) |
| N2   | Lu1  | O3   | 81.30(13)  | N2   | C15  | C16  | 124.7(4) |
| N2   | Lu1  | N1   | 92.25(14)  | C16  | C15  | C20  | 116.4(4) |
| O3   | Lu1  | I1   | 80.24(8)   | N1   | C7   | C12  | 119.5(4) |
| O3   | Lu1  | P1   | 79.03(8)   | N1   | C7   | C8   | 124.2(4) |
| O3   | Lu1  | O2   | 76.37(11)  | C12  | C7   | C8   | 116.3(4) |
| N1   | Lu1  | I1   | 140.14(10) | C6   | C3   | P1   | 107.7(4) |
| N1   | Lu1  | P1   | 57.63(9)   | C6   | C3   | C5   | 108.2(5) |
| N1   | Lu1  | O1   | 79.48(12)  | C4   | C3   | P1   | 113.3(4) |
| N1   | Lu1  | O2   | 82.48(13)  | C4   | C3   | C6   | 111.1(5) |
| N1   | Lu1  | O3   | 130.80(12) | C4   | C3   | C5   | 110.2(5) |
| C1   | P1   | Lu1  | 75.60(16)  | C5   | C3   | P1   | 106.1(4) |
| C1   | P1   | C3   | 103.7(2)   | O3   | C25  | C26  | 104.4(4) |
| C2   | P1   | Lu1  | 77.42(15)  | O2   | C24  | C23  | 106.4(4) |
| C2   | P1   | C1   | 100.2(2)   | C9   | C8   | C7   | 121.7(5) |
| C2   | P1   | C3   | 106.3(2)   | C16  | C17  | C012 | 120.0(4) |
| C3   | P1   | Lu1  | 176.24(17) | C18  | C17  | C16  | 120.4(4) |
| C29  | O1   | Lu1  | 118.8(3)   | C18  | C17  | C012 | 119.6(4) |
| C32  | O1   | Lu1  | 138.1(3)   | C32  | C31  | C30  | 104.3(4) |
| C32  | O1   | C29  | 103.1(3)   | C17  | C16  | C15  | 121.6(4) |
| C24  | O2   | Lu1  | 119.3(3)   | C28  | C27  | C26  | 102.5(4) |
| C21  | O2   | Lu1  | 132.0(3)   | O2   | C21  | C22  | 103.5(4) |
| C21  | O2   | C24  | 107.2(4)   | C25  | C26  | C27  | 102.5(4) |
| C2   | N2   | Lu1  | 119.5(3)   | C8   | C9   | C14  | 119.0(4) |

**Table S16 (Continued).** Bond Angles for  $\text{Lu}(\text{ArBiAMP}^{\text{tBu}})(\text{THF})_3$  (3).

|     |     |     |          |     |     |     |          |
|-----|-----|-----|----------|-----|-----|-----|----------|
| C15 | N2  | Lu1 | 125.7(3) | C10 | C9  | C8  | 120.5(4) |
| C15 | N2  | C2  | 114.8(4) | C10 | C9  | C14 | 120.5(4) |
| C28 | O3  | Lu1 | 123.6(3) | C17 | C18 | C19 | 119.5(4) |
| C28 | O3  | C25 | 108.6(3) | C12 | C11 | C13 | 120.8(4) |
| C25 | O3  | Lu1 | 127.5(3) | C12 | C11 | C10 | 118.9(4) |
| C1  | N1  | Lu1 | 115.8(3) | C10 | C11 | C13 | 120.4(4) |
| C7  | N1  | Lu1 | 127.7(3) | C22 | C23 | C24 | 103.9(5) |
| C7  | N1  | C1  | 115.1(3) | C9  | C10 | C11 | 120.0(4) |
| C19 | C20 | C15 | 121.9(4) | C21 | C22 | C23 | 102.2(5) |

3.7  $Y(\eta^5\text{-}(1,3\text{-diisopropyl-4,7-dimethylindenyl}))(\text{ArBiAMP}^{\text{tBu}})(\text{THF})$  (4)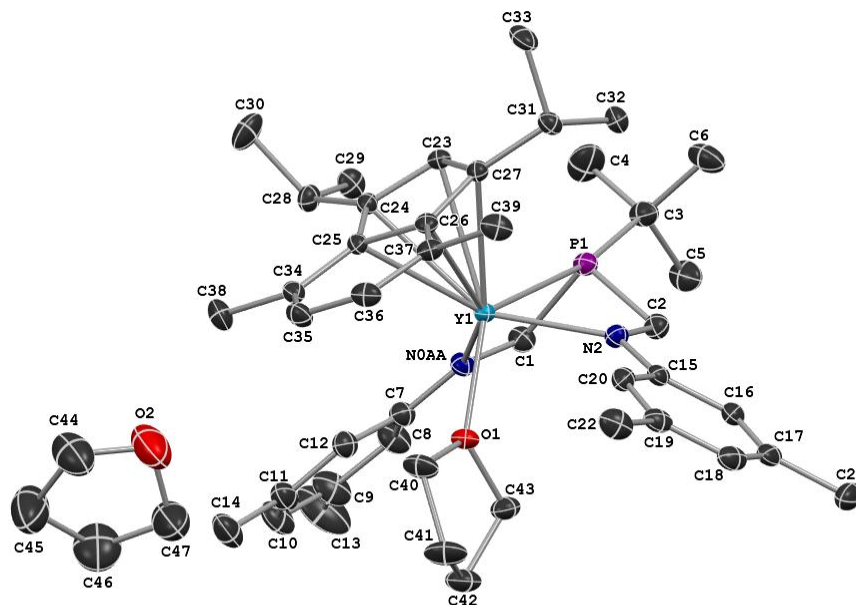

**Figure S57.** Solid state molecular structure of  $Y(\eta^5\text{-}(1,3\text{-diisopropyl-4,7-dimethylindenyl}))(\text{ArBiAMP}^{\text{tBu}})(\text{THF})$  (4) (recrystallized from THF/*n*-pentane) shown with hydrogen atoms omitted for clarity and the thermal ellipsoids set at 50% probability.

**Table S17.** Crystal data and structure refinement for  $Y(\eta^5\text{-}(1,3\text{-diisopropyl-4,7-dimethylindenyl}))(\text{ArBiAMP}^{\text{tBu}})(\text{THF})$  (4).

|                                             |                                                                 |
|---------------------------------------------|-----------------------------------------------------------------|
| Empirical formula                           | $C_{47}H_{70}N_2O_2PY$                                          |
| Formula weight                              | 814.93                                                          |
| Temperature/K                               | 100.0                                                           |
| Crystal system                              | monoclinic                                                      |
| Space group                                 | $P2_1/c$                                                        |
| <i>a</i> /Å                                 | 10.0823(13)                                                     |
| <i>b</i> /Å                                 | 28.934(4)                                                       |
| <i>c</i> /Å                                 | 15.635(2)                                                       |
| $\alpha$ /°                                 | 90                                                              |
| $\beta$ /°                                  | 99.158(4)                                                       |
| $\gamma$ /°                                 | 90                                                              |
| Volume/Å <sup>3</sup>                       | 4503.1(10)                                                      |
| Z                                           | 4                                                               |
| $\rho_{\text{calc}}$ /cm <sup>3</sup>       | 1.202                                                           |
| $\mu$ /mm <sup>-1</sup>                     | 1.368                                                           |
| F(000)                                      | 1744.0                                                          |
| Crystal size/mm <sup>3</sup>                | 0.38 × 0.24 × 0.032                                             |
| Radiation                                   | MoK $\alpha$ ( $\lambda$ = 0.71073)                             |
| 2 $\theta$ range for data collection/°      | 4.328 to 56.592                                                 |
| Index ranges                                | -13 ≤ <i>h</i> ≤ 13, -38 ≤ <i>k</i> ≤ 35, -20 ≤ <i>l</i> ≤ 20   |
| Reflections collected                       | 38274                                                           |
| Independent reflections                     | 11171 [ $R_{\text{int}}$ = 0.0650, $R_{\text{sigma}}$ = 0.0637] |
| Data/restraints/parameters                  | 11171/0/491                                                     |
| Goodness-of-fit on $F^2$                    | 1.046                                                           |
| Final R indexes [ $ I  \geq 2\sigma(I)$ ]   | $R_1$ = 0.0428, $wR_2$ = 0.1043                                 |
| Final R indexes [all data]                  | $R_1$ = 0.0608, $wR_2$ = 0.1109                                 |
| Largest diff. peak/hole / e Å <sup>-3</sup> | 0.83/-0.51                                                      |

**Table S18.** Bond Lengths for  $Y(\eta^5\text{-}(1,3\text{-diisopropyl-4,7-dimethylindenyl}))(\text{ArBiAMP}^{\text{tBu}})(\text{THF})$  (4).

| Atom | Atom | Length/Å   | Atom | Atom | Length/Å |
|------|------|------------|------|------|----------|
| Y1   | P1   | 2.8856(6)  | C37  | C39  | 1.509(3) |
| Y1   | O1   | 2.3193(14) | C36  | C35  | 1.415(3) |
| Y1   | N0AA | 2.2667(17) | C35  | C34  | 1.369(3) |
| Y1   | N2   | 2.2383(18) | C34  | C38  | 1.504(3) |
| Y1   | C27  | 2.686(2)   | C31  | C33  | 1.536(3) |
| Y1   | C23  | 2.656(2)   | C31  | C32  | 1.526(3) |
| Y1   | C24  | 2.663(2)   | C15  | C20  | 1.412(3) |
| Y1   | C25  | 2.690(2)   | C15  | C16  | 1.408(3) |
| Y1   | C26  | 2.709(2)   | C20  | C19  | 1.382(3) |
| P1   | C1   | 1.851(2)   | C19  | C22  | 1.506(3) |
| P1   | C2   | 1.855(2)   | C19  | C18  | 1.397(3) |
| P1   | C3   | 1.858(2)   | C18  | C17  | 1.393(4) |
| O1   | C40  | 1.461(3)   | C17  | C21  | 1.507(3) |
| O1   | C43  | 1.473(3)   | C17  | C16  | 1.390(3) |
| O2   | C44  | 1.382(4)   | C3   | C4   | 1.523(4) |
| O2   | C47  | 1.409(4)   | C3   | C5   | 1.521(3) |
| N0AA | C1   | 1.463(3)   | C3   | C6   | 1.535(3) |
| N0AA | C7   | 1.387(3)   | C7   | C12  | 1.412(3) |
| N2   | C2   | 1.465(3)   | C7   | C8   | 1.401(3) |
| N2   | C15  | 1.377(3)   | C12  | C11  | 1.384(3) |
| C27  | C23  | 1.410(3)   | C11  | C14  | 1.513(3) |
| C27  | C26  | 1.435(3)   | C11  | C10  | 1.391(3) |
| C27  | C31  | 1.518(3)   | C10  | C9   | 1.381(4) |
| C23  | C24  | 1.410(3)   | C9   | C8   | 1.396(3) |
| C24  | C28  | 1.525(3)   | C9   | C13  | 1.517(4) |
| C24  | C25  | 1.432(3)   | C40  | C41  | 1.512(3) |
| C28  | C29  | 1.526(3)   | C41  | C42  | 1.520(4) |
| C28  | C30  | 1.533(3)   | C42  | C43  | 1.505(3) |
| C25  | C26  | 1.467(3)   | C46  | C45  | 1.534(5) |
| C25  | C34  | 1.439(3)   | C46  | C47  | 1.478(5) |
| C26  | C37  | 1.437(3)   | C45  | C44  | 1.486(5) |
| C37  | C36  | 1.372(3)   |      |      |          |

**Table S18.** Bond Angles for  $Y(\eta^5\text{-}(1,3\text{-diisopropyl-4,7-dimethylindenyl}))(\text{ArBiAMP}^{\text{tBu}})(\text{THF})$  (4).

| Atom | Atom | Atom | Angle/°   | Atom | Atom | Atom | Angle/°    |
|------|------|------|-----------|------|------|------|------------|
| O1   | Y1   | P1   | 129.81(4) | C24  | C28  | C29  | 112.95(18) |
| O1   | Y1   | C27  | 126.61(6) | C24  | C28  | C30  | 110.40(18) |
| O1   | Y1   | C23  | 145.34(6) | C29  | C28  | C30  | 109.38(19) |
| O1   | Y1   | C24  | 121.40(6) | C24  | C25  | Y1   | 73.44(12)  |
| O1   | Y1   | C25  | 95.48(6)  | C24  | C25  | C26  | 107.78(17) |
| O1   | Y1   | C26  | 98.28(6)  | C24  | C25  | C34  | 132.69(19) |
| N0AA | Y1   | P1   | 60.45(5)  | C26  | C25  | Y1   | 74.94(11)  |
| N0AA | Y1   | O1   | 89.96(6)  | C34  | C25  | Y1   | 121.15(13) |
| N0AA | Y1   | C27  | 139.60(6) | C34  | C25  | C26  | 119.35(19) |
| N0AA | Y1   | C23  | 109.40(6) | C27  | C26  | Y1   | 73.69(11)  |
| N0AA | Y1   | C24  | 97.03(6)  | C27  | C26  | C25  | 107.45(18) |
| N0AA | Y1   | C25  | 116.27(6) | C27  | C26  | C37  | 132.17(19) |
| N0AA | Y1   | C26  | 147.10(6) | C25  | C26  | Y1   | 73.53(11)  |
| N2   | Y1   | P1   | 60.08(5)  | C37  | C26  | Y1   | 122.30(14) |
| N2   | Y1   | O1   | 87.96(6)  | C37  | C26  | C25  | 120.16(18) |
| N2   | Y1   | N0AA | 97.21(7)  | C26  | C37  | C39  | 123.07(19) |
| N2   | Y1   | C27  | 100.29(6) | C36  | C37  | C26  | 117.31(19) |
| N2   | Y1   | C23  | 116.47(6) | C36  | C37  | C39  | 119.5(2)   |
| N2   | Y1   | C24  | 147.22(6) | C37  | C36  | C35  | 122.8(2)   |
| N2   | Y1   | C25  | 146.29(6) | C34  | C35  | C36  | 122.5(2)   |
| N2   | Y1   | C26  | 114.78(6) | C25  | C34  | C38  | 122.7(2)   |
| C27  | Y1   | P1   | 98.28(5)  | C35  | C34  | C25  | 117.86(19) |
| C27  | Y1   | C25  | 51.60(6)  | C35  | C34  | C38  | 119.36(19) |
| C27  | Y1   | C26  | 30.86(6)  | C27  | C31  | C33  | 109.52(17) |
| C23  | Y1   | P1   | 84.78(5)  | C27  | C31  | C32  | 113.09(17) |

**Table S18 (Continued).** Bond Angles for  $Y(\eta^5\text{-}(1,3\text{-diisopropyl-4,7-dimethylindenyl}))(\text{}^{\text{Ar}}\text{BiAMP}^{\text{tBu}})(\text{THF})$  (4).

|     |      |     |            |      |     |     |            |
|-----|------|-----|------------|------|-----|-----|------------|
| C23 | Y1   | C27 | 30.60(6)   | C32  | C31 | C33 | 110.29(18) |
| C23 | Y1   | C24 | 30.76(6)   | N0AA | C1  | P1  | 105.50(14) |
| C23 | Y1   | C25 | 50.41(6)   | N2   | C2  | P1  | 103.90(14) |
| C23 | Y1   | C26 | 50.29(6)   | N2   | C15 | C20 | 117.84(19) |
| C24 | Y1   | P1  | 102.94(5)  | N2   | C15 | C16 | 125.6(2)   |
| C24 | Y1   | C27 | 51.75(6)   | C16  | C15 | C20 | 116.5(2)   |
| C24 | Y1   | C25 | 31.02(6)   | C19  | C20 | C15 | 123.0(2)   |
| C24 | Y1   | C26 | 51.68(6)   | C20  | C19 | C22 | 120.0(2)   |
| C25 | Y1   | P1  | 133.01(5)  | C20  | C19 | C18 | 118.6(2)   |
| C25 | Y1   | C26 | 31.52(6)   | C18  | C19 | C22 | 121.4(2)   |
| C26 | Y1   | P1  | 129.10(5)  | C17  | C18 | C19 | 120.4(2)   |
| C1  | P1   | Y1  | 80.15(7)   | C18  | C17 | C21 | 120.8(2)   |
| C1  | P1   | C2  | 103.49(10) | C16  | C17 | C18 | 119.9(2)   |
| C1  | P1   | C3  | 105.60(11) | C16  | C17 | C21 | 119.3(2)   |
| C2  | P1   | Y1  | 79.17(7)   | C17  | C16 | C15 | 121.5(2)   |
| C2  | P1   | C3  | 107.44(10) | C4   | C3  | P1  | 107.85(17) |
| C3  | P1   | Y1  | 169.50(7)  | C4   | C3  | C6  | 108.8(2)   |
| C40 | O1   | Y1  | 132.56(13) | C5   | C3  | P1  | 110.54(16) |
| C40 | O1   | C43 | 109.09(16) | C5   | C3  | C4  | 110.9(2)   |
| C43 | O1   | Y1  | 118.31(12) | C5   | C3  | C6  | 109.9(2)   |
| C44 | O2   | C47 | 106.3(2)   | C6   | C3  | P1  | 108.85(17) |
| C1  | N0AA | Y1  | 113.54(13) | N0AA | C7  | C12 | 118.7(2)   |
| C7  | N0AA | Y1  | 131.06(15) | N0AA | C7  | C8  | 124.6(2)   |
| C7  | N0AA | C1  | 115.40(18) | C8   | C7  | C12 | 116.7(2)   |
| C2  | N2   | Y1  | 113.39(13) | C11  | C12 | C7  | 122.4(2)   |
| C15 | N2   | Y1  | 127.39(14) | C12  | C11 | C14 | 120.1(2)   |
| C15 | N2   | C2  | 117.29(17) | C12  | C11 | C10 | 119.1(2)   |
| C23 | C27  | Y1  | 73.52(11)  | C10  | C11 | C14 | 120.8(2)   |
| C23 | C27  | C26 | 106.52(17) | C9   | C10 | C11 | 120.4(2)   |
| C23 | C27  | C31 | 123.96(18) | C10  | C9  | C8  | 120.1(2)   |
| C26 | C27  | Y1  | 75.45(11)  | C10  | C9  | C13 | 120.7(2)   |
| C26 | C27  | C31 | 128.62(18) | C8   | C9  | C13 | 119.2(3)   |
| C31 | C27  | Y1  | 124.79(13) | C9   | C8  | C7  | 121.3(2)   |
| C27 | C23  | Y1  | 75.89(12)  | O1   | C40 | C41 | 105.2(2)   |
| C27 | C23  | C24 | 111.74(18) | C40  | C41 | C42 | 102.6(2)   |
| C24 | C23  | Y1  | 74.89(11)  | C43  | C42 | C41 | 101.93(19) |
| C23 | C24  | Y1  | 74.35(11)  | O1   | C43 | C42 | 104.45(19) |
| C23 | C24  | C28 | 124.02(19) | C47  | C46 | C45 | 102.8(3)   |
| C23 | C24  | C25 | 106.47(17) | C44  | C45 | C46 | 103.9(3)   |
| C28 | C24  | Y1  | 121.45(13) | O2   | C44 | C45 | 107.7(3)   |
| C25 | C24  | Y1  | 75.54(12)  | O2   | C47 | C46 | 105.7(3)   |
| C25 | C24  | C28 | 129.07(18) |      |     |     |            |

3.7.1.  $Y(\eta^5\text{-}(1,3\text{-diisopropyl-4,7-dimethylindenyl}))(\text{ArBiAMP}^{\text{tBu}})(\text{THF})(\text{Et}_2\text{O})$  (4a)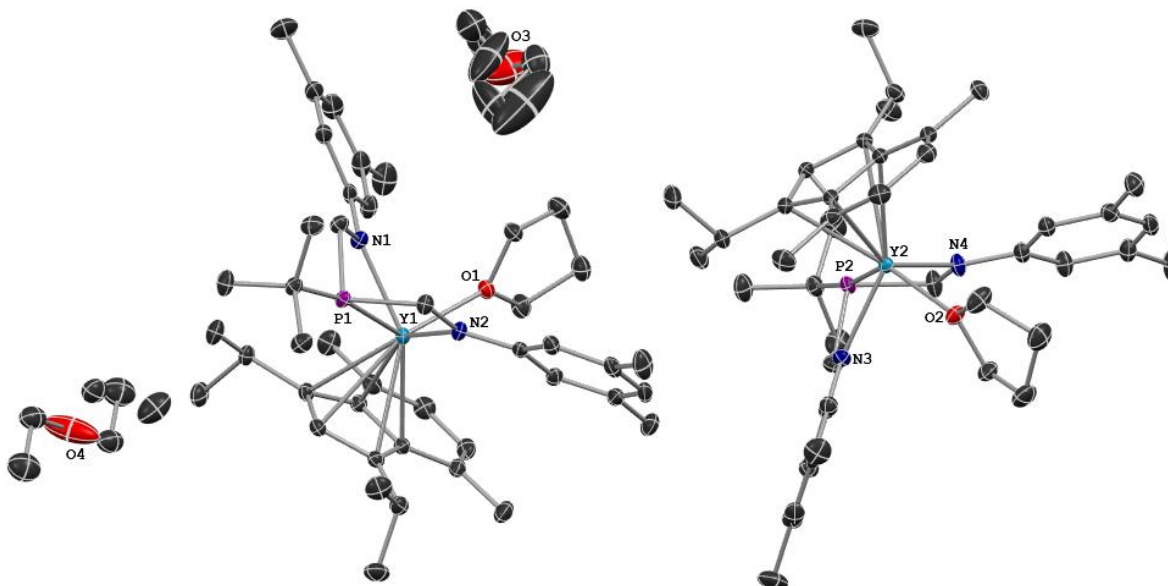

**Figure S57a.** Solid state molecular structure of  $Y(\eta^5\text{-}(1,3\text{-diisopropyl-4,7-dimethylindenyl}))(\text{ArBiAMP}^{\text{tBu}})(\text{THF})(\text{Et}_2\text{O})$  (4a) (recrystallized from THF / Et<sub>2</sub>O) shown with hydrogen atoms omitted for clarity and the thermal ellipsoids set at 50% probability.

**Table S17a.** Crystal data and structure refinement for  $Y(\eta^5\text{-}(1,3\text{-diisopropyl-4,7-dimethylindenyl}))(\text{ArBiAMP}^{\text{tBu}})(\text{THF})(\text{Et}_2\text{O})$  (4a)..

|                                             |                                                                                                |
|---------------------------------------------|------------------------------------------------------------------------------------------------|
| Identification code                         | BiAMPYInd_Ether (1)                                                                            |
| Empirical formula                           | C <sub>92</sub> H <sub>139</sub> N <sub>4</sub> O <sub>3.5</sub> P <sub>2</sub> Y <sub>2</sub> |
| Formula weight                              | 1596.82                                                                                        |
| Temperature/K                               | 100.0                                                                                          |
| Crystal system                              | triclinic                                                                                      |
| Space group                                 | P-1                                                                                            |
| a/Å                                         | 12.7857(14)                                                                                    |
| b/Å                                         | 18.839(2)                                                                                      |
| c/Å                                         | 19.534(2)                                                                                      |
| α/°                                         | 98.801(3)                                                                                      |
| β/°                                         | 105.570(3)                                                                                     |
| γ/°                                         | 99.416(3)                                                                                      |
| Volume/Å <sup>3</sup>                       | 4374.2(9)                                                                                      |
| Z                                           | 2                                                                                              |
| ρ <sub>calc</sub> /cm <sup>3</sup>          | 1.212                                                                                          |
| μ/mm <sup>-1</sup>                          | 1.406                                                                                          |
| F(000)                                      | 1710.0                                                                                         |
| Crystal size/mm <sup>3</sup>                | 0.15 × 0.09 × 0.09                                                                             |
| Radiation                                   | MoKα (λ = 0.71073)                                                                             |
| 2θ range for data collection/°              | 4.568 to 56.564                                                                                |
| Index ranges                                | -17 ≤ h ≤ 17, -25 ≤ k ≤ 25, -26 ≤ l ≤ 26                                                       |
| Reflections collected                       | 74818                                                                                          |
| Independent reflections                     | 21611 [R <sub>int</sub> = 0.0282, R <sub>sigma</sub> = 0.0267]                                 |
| Data/restraints/parameters                  | 21611/0/1002                                                                                   |
| Goodness-of-fit on F <sup>2</sup>           | 1.023                                                                                          |
| Final R indexes [I ≥ 2σ (I)]                | R <sub>1</sub> = 0.0279, wR <sub>2</sub> = 0.0659                                              |
| Final R indexes [all data]                  | R <sub>1</sub> = 0.0342, wR <sub>2</sub> = 0.0683                                              |
| Largest diff. peak/hole / e Å <sup>-3</sup> | 0.63/-0.53                                                                                     |



3.8  $\text{La}(\eta^5\text{-}(1,3\text{-diisopropyl-4,7-dimethylindenyl}))(\text{ArBiAMP}^{\text{tBu}})(\text{THF})_2$  (5)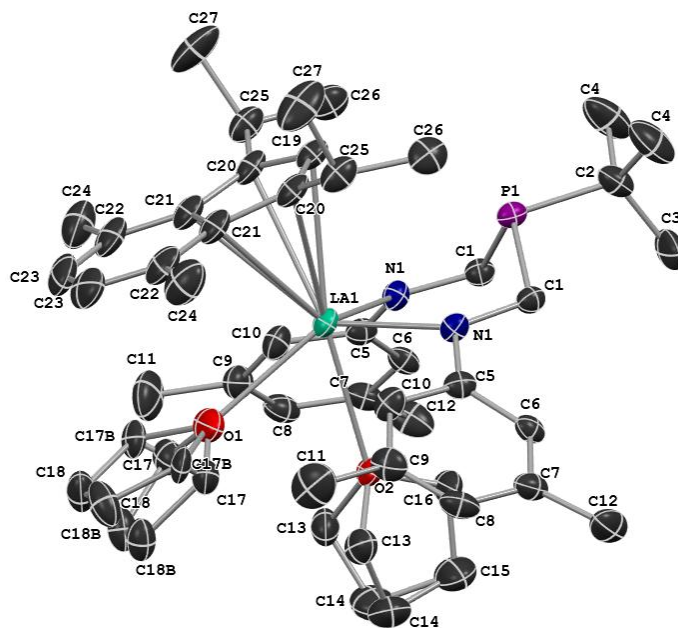

**Figure S58.** Solid state molecular structure of  $\text{La}(\eta^5\text{-}(1,3\text{-diisopropyl-4,7-dimethylindenyl}))(\text{ArBiAMP}^{\text{tBu}})(\text{THF})_2$  (5) (recrystallized from THF/*n*-pentane) shown with hydrogen atoms omitted for clarity and the thermal ellipsoids set at 50% probability. The disorder arising from the symmetry generation is shown on the coordinated THF molecules. Two solvent molecules that are present in the unit cell, pentane and THF, are not well-resolved, and the carbon atoms remain isotropic; these molecules are omitted for clarity.

**Table S19.** Crystal data and structure refinement for  $\text{La}(\eta^5\text{-}(1,3\text{-diisopropyl-4,7-dimethylindenyl}))(\text{ArBiAMP}^{\text{tBu}})(\text{THF})_2$  (5).

|                                               |                                                               |
|-----------------------------------------------|---------------------------------------------------------------|
| Empirical formula                             | $\text{C}_{51}\text{H}_{69}\text{LaN}_2\text{O}_2\text{P}$    |
| Formula weight                                | 911.96                                                        |
| Temperature/K                                 | 100.0                                                         |
| Crystal system                                | tetragonal                                                    |
| Space group                                   | $P-4_21m$                                                     |
| $a/\text{\AA}$                                | 21.1393(6)                                                    |
| $b/\text{\AA}$                                | 21.1393(6)                                                    |
| $c/\text{\AA}$                                | 10.8270(4)                                                    |
| $\alpha/^\circ$                               | 90                                                            |
| $\beta/^\circ$                                | 90                                                            |
| $\gamma/^\circ$                               | 90                                                            |
| Volume/ $\text{\AA}^3$                        | 4838.3(3)                                                     |
| Z                                             | 4                                                             |
| $\rho_{\text{calc}}/\text{g/cm}^3$            | 1.252                                                         |
| $\mu/\text{mm}^{-1}$                          | 0.954                                                         |
| $F(000)$                                      | 1908.0                                                        |
| Crystal size/ $\text{mm}^3$                   | $0.22 \times 0.15 \times 0.15$                                |
| Radiation                                     | $\text{MoK}\alpha$ ( $\lambda = 0.71073$ )                    |
| $2\theta$ range for data collection/ $^\circ$ | 4.226 to 56.658                                               |
| Index ranges                                  | $-25 \leq h \leq 28, -28 \leq k \leq 28, -14 \leq l \leq 14$  |
| Reflections collected                         | 87253                                                         |
| Independent reflections                       | 6246 [ $R_{\text{int}} = 0.0804, R_{\text{sigma}} = 0.0361$ ] |
| Data/restraints/parameters                    | 6246/9/317                                                    |
| Goodness-of-fit on $F^2$                      | 1.062                                                         |
| Final R indexes [ $ I  \geq 2\sigma(I)$ ]     | $R_1 = 0.0333, wR_2 = 0.0867$                                 |
| Final R indexes [all data]                    | $R_1 = 0.0372, wR_2 = 0.0880$                                 |
| Largest diff. peak/hole / $e \text{\AA}^{-3}$ | 0.78/-0.68                                                    |
| Flack parameter                               | 0.02(2)                                                       |

**Table S20.** Bond Lengths for **La( $\eta^5$ -(1,3-diisopropyl-4,7-dimethylindenyl)(<sup>Ar</sup>BiAMP<sup>tBu</sup>)(THF)<sub>2</sub> (5).**

| Atom | Atom  | Length/Å  | Atom | Atom  | Length/Å  |
|------|-------|-----------|------|-------|-----------|
| La1  | O1    | 2.573(5)  | C2   | C3    | 1.517(6)  |
| La1  | N11   | 2.386(3)  | C2   | C31   | 1.517(6)  |
| La1  | N1    | 2.386(3)  | C2   | C4    | 1.542(11) |
| La1  | O2    | 2.668(4)  | C25  | C26   | 1.530(7)  |
| La1  | C19   | 2.872(6)  | C25  | C27   | 1.543(6)  |
| La1  | C20   | 2.894(4)  | C6   | C5    | 1.409(7)  |
| La1  | C201  | 2.894(4)  | C13  | C14   | 1.513(9)  |
| La1  | C21   | 2.956(4)  | C14  | C15   | 1.450(15) |
| La1  | C211  | 2.956(4)  | C23  | C231  | 1.387(13) |
| P1   | C11   | 1.858(4)  | C23  | C22   | 1.379(8)  |
| P1   | C1    | 1.858(4)  | C24  | C22   | 1.508(9)  |
| P1   | C2    | 1.876(7)  | C17  | C18   | 1.80(2)   |
| O1   | C171  | 1.296(16) | C18A | C18A1 | 1.148(18) |
| O1   | C17   | 1.296(16) | C18A | C17A  | 1.578(15) |
| O1   | C17A  | 1.564(12) | C18  | C181  | 1.18(2)   |
| O1   | C17A1 | 1.564(12) | C36  | C352  | 1.48(3)   |
| N1   | C1    | 1.472(5)  | C36  | C35   | 1.48(3)   |
| N1   | C5    | 1.377(5)  | C29  | C293  | 1.94(4)   |
| O2   | C16   | 1.532(10) | C29  | C294  | 1.94(4)   |
| O2   | C13   | 1.419(7)  | C29  | C283  | 1.13(5)   |
| C19  | C20   | 1.415(6)  | C29  | C28   | 0.95(5)   |
| C19  | C201  | 1.415(6)  | C35  | C34   | 1.09(6)   |
| C20  | C21   | 1.431(7)  | C28  | C284  | 1.66(6)   |
| C20  | C25   | 1.517(6)  | C28  | C283  | 1.66(6)   |
| C9   | C10   | 1.377(6)  | C30  | C302  | 1.41(6)   |
| C9   | C8    | 1.391(7)  | C30  | C31   | 1.55(2)   |
| C9   | C12   | 1.519(7)  | C30  | C311  | 1.55(2)   |
| C16  | C15   | 1.50(2)   | C31  | C312  | 1.52(6)   |
| C10  | C5    | 1.423(7)  | C31  | C315  | 1.30(6)   |
| C21  | C211  | 1.484(9)  | C31  | C311  | 0.79(6)   |
| C21  | C22   | 1.426(7)  | C31  | C322  | 1.95(4)   |
| C7   | C6    | 1.397(6)  | C31  | C32   | 1.55(3)   |
| C7   | C8    | 1.379(7)  | C32  | C322  | 1.08(11)  |
| C7   | C11   | 1.501(8)  | C34  | C33   | 1.38(6)   |

**Table S21.** Bond Angles for **La( $\eta^5$ -(1,3-diisopropyl-4,7-dimethylindenyl)(<sup>Ar</sup>BiAMP<sup>tBu</sup>)(THF)<sub>2</sub> (5).**

| Atom | Atom | Atom | Angle/°    | Atom | Atom | Atom | Angle/°  |
|------|------|------|------------|------|------|------|----------|
| O1   | La1  | O2   | 68.28(13)  | C20  | C21  | La1  | 73.5(2)  |
| O1   | La1  | C19  | 123.36(18) | C20  | C21  | C211 | 107.3(3) |
| O1   | La1  | C201 | 105.84(14) | C211 | C21  | La1  | 75.46(9) |
| O1   | La1  | C20  | 105.84(14) | C22  | C21  | La1  | 119.0(3) |
| O1   | La1  | C211 | 79.32(14)  | C22  | C21  | C20  | 133.2(5) |
| O1   | La1  | C21  | 79.32(14)  | C22  | C21  | C211 | 119.4(3) |
| N11  | La1  | O1   | 126.26(10) | C6   | C7   | C11  | 118.9(5) |
| N1   | La1  | O1   | 126.26(10) | C8   | C7   | C6   | 119.9(5) |
| N1   | La1  | N11  | 86.40(16)  | C8   | C7   | C11  | 121.2(4) |
| N11  | La1  | O2   | 79.81(11)  | C3   | C2   | P1   | 107.5(4) |
| N1   | La1  | O2   | 79.81(11)  | C31  | C2   | P1   | 107.5(4) |
| N11  | La1  | C19  | 91.76(13)  | C31  | C2   | C3   | 109.8(6) |
| N1   | La1  | C19  | 91.76(13)  | C3   | C2   | C4   | 108.9(4) |
| N11  | La1  | C201 | 119.13(13) | C31  | C2   | C4   | 108.9(4) |
| N1   | La1  | C20  | 119.13(13) | C4   | C2   | P1   | 114.1(4) |
| N11  | La1  | C20  | 86.25(13)  | C20  | C25  | C26  | 113.6(4) |
| N1   | La1  | C201 | 86.25(13)  | C20  | C25  | C27  | 109.5(4) |
| N1   | La1  | C21  | 133.34(13) | C26  | C25  | C27  | 107.9(4) |
| N1   | La1  | C211 | 110.03(12) | C7   | C6   | C5   | 121.2(5) |
| N11  | La1  | C21  | 110.03(12) | O2   | C13  | C14  | 109.1(6) |
| N11  | La1  | C211 | 133.34(13) | C15  | C14  | C13  | 102.4(7) |
| O2   | La1  | C19  | 168.37(16) | N1   | C5   | C10  | 118.3(4) |
| O2   | La1  | C20  | 155.84(9)  | N1   | C5   | C6   | 125.1(4) |

|       |     |       |            |       |      |      |           |
|-------|-----|-------|------------|-------|------|------|-----------|
| O2    | La1 | C201  | 155.84(9)  | C6    | C5   | C10  | 116.6(4)  |
| O2    | La1 | C21   | 144.49(12) | C7    | C8   | C9   | 120.6(4)  |
| O2    | La1 | C211  | 144.49(13) | C22   | C23  | C231 | 122.9(3)  |
| C19   | La1 | C201  | 28.41(12)  | C21   | C22  | C24  | 122.9(5)  |
| C19   | La1 | C20   | 28.41(12)  | C23   | C22  | C21  | 117.7(5)  |
| C19   | La1 | C21   | 46.24(17)  | C23   | C22  | C24  | 119.4(5)  |
| C19   | La1 | C211  | 46.24(17)  | O1    | C17  | C18  | 99.4(11)  |
| C20   | La1 | C201  | 47.58(18)  | C18A1 | C18A | C17A | 115.4(5)  |
| C201  | La1 | C21   | 47.32(13)  | C181  | C18  | C17  | 104.3(6)  |
| C20   | La1 | C211  | 47.32(13)  | O1    | C17A | C18A | 94.2(9)   |
| C201  | La1 | C211  | 28.30(13)  | C14   | C15  | C16  | 107.4(10) |
| C20   | La1 | C21   | 28.30(13)  | C35   | C36  | C352 | 97(5)     |
| C21   | La1 | C211  | 29.09(18)  | C293  | C29  | C294 | 81.6(11)  |
| C11   | P1  | C1    | 99.5(2)    | C28   | C29  | C293 | 86(3)     |
| C1    | P1  | C2    | 102.30(18) | C28   | C29  | C294 | 24(3)     |
| C11   | P1  | C2    | 102.30(18) | C283  | C29  | C293 | 20(3)     |
| C17   | O1  | La1   | 122.3(7)   | C283  | C29  | C294 | 97(3)     |
| C171  | O1  | La1   | 122.3(7)   | C28   | C29  | C283 | 105(5)    |
| C171  | O1  | C17   | 106.2(14)  | C34   | C35  | C36  | 130(5)    |
| C171  | O1  | C17A1 | 22.2(6)    | C29   | C28  | C294 | 137(5)    |
| C17   | O1  | C17A1 | 110.7(7)   | C294  | C28  | C284 | 34(3)     |
| C17A  | O1  | La1   | 126.2(4)   | C29   | C28  | C283 | 41(3)     |
| C17A1 | O1  | La1   | 126.2(4)   | C29   | C28  | C284 | 104(5)    |
| C17A  | O1  | C17A1 | 106.2(9)   | C294  | C28  | C283 | 114(3)    |
| C1    | N1  | La1   | 127.3(2)   | C283  | C28  | C284 | 84(2)     |
| C5    | N1  | La1   | 113.1(3)   | C302  | C30  | C31  | 88.1(17)  |
| C5    | N1  | C1    | 115.6(4)   | C302  | C30  | C311 | 88.1(17)  |
| C16   | O2  | La1   | 126.3(4)   | C31   | C30  | C311 | 30(2)     |
| C13   | O2  | La1   | 118.9(4)   | C315  | C31  | C30  | 91.9(17)  |
| C13   | O2  | C16   | 99.5(5)    | C312  | C31  | C30  | 84.0(17)  |
| C20   | C19 | La1   | 76.7(3)    | C311  | C31  | C30  | 75.2(12)  |
| C201  | C19 | La1   | 76.7(3)    | C311  | C31  | C312 | 59(2)     |
| C20   | C19 | C201  | 111.2(6)   | C315  | C31  | C312 | 31(2)     |
| C19   | C20 | La1   | 74.9(3)    | C312  | C31  | C32  | 79(2)     |
| C19   | C20 | C21   | 107.1(4)   | C315  | C31  | C32  | 86(2)     |
| C19   | C20 | C25   | 123.9(5)   | C311  | C31  | C32  | 75.2(12)  |
| C21   | C20 | La1   | 78.2(2)    | C32   | C31  | C30  | 150(2)    |
| C21   | C20 | C25   | 127.5(4)   | C31   | C32  | C312 | 50(2)     |
| C25   | C20 | La1   | 123.7(3)   | C311  | C32  | C312 | 42(2)     |
| N1    | C1  | P1    | 108.7(2)   | C311  | C32  | C31  | 30(2)     |
| C10   | C9  | C8    | 119.5(4)   | C322  | C32  | C311 | 94(2)     |
| C10   | C9  | C12   | 121.8(5)   | C322  | C32  | C31  | 94(2)     |
| C8    | C9  | C12   | 118.6(4)   | C322  | C32  | C312 | 52.4(15)  |
| C15   | C16 | O2    | 99.9(11)   | C35   | C34  | C33  | 131(5)    |
| C9    | C10 | C5    | 122.0(5)   | C342  | C33  | C34  | 102(5)    |

3.9 Lu( $\eta^5$ -(1,3-diisopropyl-4,7-dimethylindenyl))(ArBiAMP<sup>tBu</sup>)(THF) (6)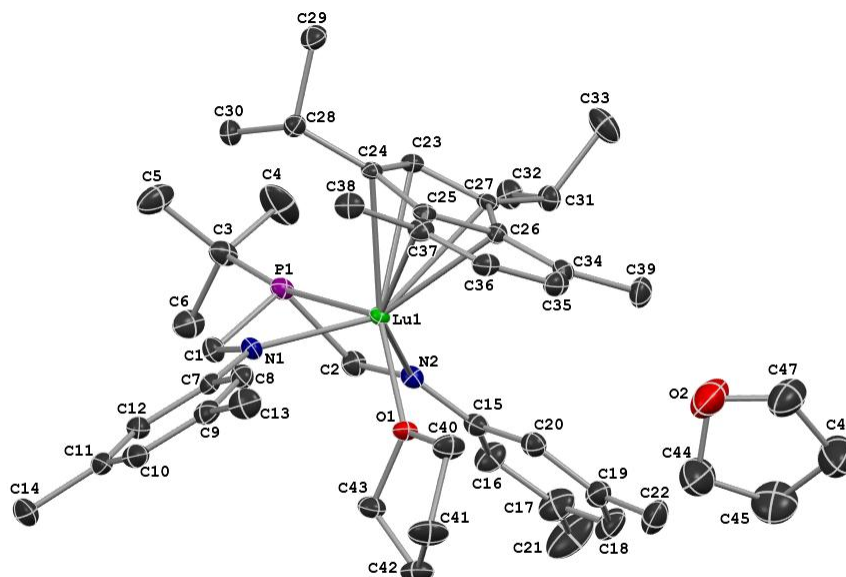

**Figure S59.** Solid state molecular structure of Lu( $\eta^5$ -(1,3-diisopropyl-4,7-dimethylindenyl))(ArBiAMP<sup>tBu</sup>)(THF) (6) (recrystallized from THF/n-pentane) shown with hydrogen atoms omitted for clarity and the thermal ellipsoids set at 50% probability.

**Table S22.** Crystal data and structure refinement for Lu( $\eta^5$ -(1,3-diisopropyl-4,7-dimethylindenyl))(ArBiAMP<sup>tBu</sup>)(THF) (6).

|                                             |                                                                   |
|---------------------------------------------|-------------------------------------------------------------------|
| Identification code                         | LuBiAMPInd (2)                                                    |
| Empirical formula                           | C <sub>47</sub> H <sub>70</sub> LuN <sub>2</sub> O <sub>2</sub> P |
| Formula weight                              | 900.99                                                            |
| Temperature/K                               | 100.0                                                             |
| Crystal system                              | monoclinic                                                        |
| Space group                                 | P2 <sub>1</sub> /c                                                |
| a/Å                                         | 10.0585(4)                                                        |
| b/Å                                         | 28.9336(10)                                                       |
| c/Å                                         | 15.5726(6)                                                        |
| $\alpha$ /°                                 | 90                                                                |
| $\beta$ /°                                  | 99.117(2)                                                         |
| $\gamma$ /°                                 | 90                                                                |
| Volume/Å <sup>3</sup>                       | 4474.8(3)                                                         |
| Z                                           | 4                                                                 |
| $\rho_{\text{calc}}$ /cm <sup>3</sup>       | 1.337                                                             |
| $\mu$ /mm <sup>-1</sup>                     | 2.279                                                             |
| F(000)                                      | 1872.0                                                            |
| Crystal size/mm <sup>3</sup>                | 0.17 × 0.12 × 0.03                                                |
| Radiation                                   | MoK $\alpha$ ( $\lambda$ = 0.71073)                               |
| 2 $\theta$ range for data collection/°      | 3.866 to 56.566                                                   |
| Index ranges                                | -13 ≤ h ≤ 13, -38 ≤ k ≤ 38, -20 ≤ l ≤ 19                          |
| Reflections collected                       | 99041                                                             |
| Independent reflections                     | 11121 [R <sub>int</sub> = 0.0538, R <sub>sigma</sub> = 0.0258]    |
| Data/restraints/parameters                  | 11121/0/492                                                       |
| Goodness-of-fit on F <sup>2</sup>           | 1.237                                                             |
| Final R indexes [I ≥ 2 $\sigma$ (I)]        | R <sub>1</sub> = 0.0350, wR <sub>2</sub> = 0.0736                 |
| Final R indexes [all data]                  | R <sub>1</sub> = 0.0397, wR <sub>2</sub> = 0.0747                 |
| Largest diff. peak/hole / e Å <sup>-3</sup> | 1.71/-2.60                                                        |

**Table S23.** Bond Lengths for **Lu( $\eta^5$ -(1,3-diisopropyl-4,7-dimethylindenyl)(<sup>Ar</sup>BiAMP<sup>tBu</sup>)(THF) (6).**

| Atom | Atom | Length/Å  | Atom | Atom | Length/Å |
|------|------|-----------|------|------|----------|
| Lu1  | P1   | 2.8578(8) | C28  | C30  | 1.533(4) |
| Lu1  | O1   | 2.264(2)  | C34  | C39  | 1.508(5) |
| Lu1  | C23  | 2.607(3)  | C34  | C35  | 1.377(5) |
| Lu1  | N2   | 2.225(3)  | C35  | C36  | 1.411(5) |
| Lu1  | N1   | 2.203(3)  | C36  | C37  | 1.356(4) |
| Lu1  | C25  | 2.676(3)  | C37  | C38  | 1.524(5) |
| Lu1  | C26  | 2.663(3)  | C15  | C16  | 1.413(4) |
| Lu1  | C27  | 2.616(3)  | C15  | C20  | 1.414(5) |
| Lu1  | C24  | 2.638(3)  | C16  | C17  | 1.390(5) |
| P1   | C2   | 1.850(3)  | C17  | C21  | 1.512(5) |
| P1   | C1   | 1.851(3)  | C17  | C18  | 1.385(6) |
| P1   | C3   | 1.859(3)  | C18  | C19  | 1.399(5) |
| O1   | C43  | 1.477(4)  | C19  | C22  | 1.513(5) |
| O1   | C40  | 1.462(4)  | C19  | C20  | 1.378(5) |
| O2   | C44  | 1.409(6)  | C7   | C8   | 1.407(5) |
| O2   | C47  | 1.392(6)  | C7   | C12  | 1.407(4) |
| C23  | C27  | 1.413(4)  | C8   | C9   | 1.385(5) |
| C23  | C24  | 1.413(4)  | C9   | C13  | 1.508(5) |
| N2   | C2   | 1.467(4)  | C9   | C10  | 1.402(5) |
| N2   | C15  | 1.371(4)  | C10  | C11  | 1.384(5) |
| N1   | C1   | 1.473(4)  | C11  | C14  | 1.518(5) |
| N1   | C7   | 1.380(4)  | C11  | C12  | 1.395(5) |
| C25  | C26  | 1.455(4)  | C3   | C6   | 1.521(5) |
| C25  | C24  | 1.432(4)  | C3   | C5   | 1.531(5) |
| C25  | C37  | 1.441(4)  | C3   | C4   | 1.526(5) |
| C26  | C27  | 1.444(4)  | C43  | C42  | 1.511(5) |
| C26  | C34  | 1.434(4)  | C42  | C41  | 1.525(5) |
| C27  | C31  | 1.524(4)  | C41  | C40  | 1.513(5) |
| C31  | C32  | 1.531(5)  | C46  | C45  | 1.527(8) |
| C31  | C33  | 1.532(5)  | C46  | C47  | 1.505(7) |
| C24  | C28  | 1.519(4)  | C45  | C44  | 1.484(7) |
| C28  | C29  | 1.531(4)  |      |      |          |

**Table S24.** Bond Angles for **Lu( $\eta^5$ -(1,3-diisopropyl-4,7-dimethylindenyl)(<sup>Ar</sup>BiAMP<sup>tBu</sup>)(THF) (6).**

| Atom | Atom | Atom | Angle/°    | Atom | Atom | Atom | Angle/°   |
|------|------|------|------------|------|------|------|-----------|
| O1   | Lu1  | P1   | 130.12(6)  | C23  | C27  | Lu1  | 73.92(17) |
| O1   | Lu1  | C23  | 145.38(9)  | C23  | C27  | C26  | 106.4(3)  |
| O1   | Lu1  | C25  | 97.43(9)   | C23  | C27  | C31  | 124.1(3)  |
| O1   | Lu1  | C26  | 94.48(8)   | C26  | C27  | Lu1  | 75.89(16) |
| O1   | Lu1  | C27  | 120.98(9)  | C26  | C27  | C31  | 128.8(3)  |
| O1   | Lu1  | C24  | 125.99(9)  | C31  | C27  | Lu1  | 122.7(2)  |
| C23  | Lu1  | P1   | 84.45(7)   | C27  | C31  | C32  | 112.4(3)  |
| C23  | Lu1  | C25  | 51.11(9)   | C27  | C31  | C33  | 110.5(3)  |
| C23  | Lu1  | C26  | 51.46(9)   | C32  | C31  | C33  | 109.2(3)  |
| C23  | Lu1  | C27  | 31.39(9)   | C23  | C24  | Lu1  | 73.14(16) |
| C23  | Lu1  | C24  | 31.25(9)   | C23  | C24  | C25  | 106.5(3)  |
| N2   | Lu1  | P1   | 61.34(7)   | C23  | C24  | C28  | 123.7(3)  |
| N2   | Lu1  | O1   | 89.79(9)   | C25  | C24  | Lu1  | 75.82(17) |
| N2   | Lu1  | C23  | 109.38(9)  | C25  | C24  | C28  | 128.8(3)  |
| N2   | Lu1  | C25  | 146.89(9)  | C28  | C24  | Lu1  | 125.3(2)  |
| N2   | Lu1  | C26  | 115.85(9)  | C24  | C28  | C29  | 109.6(3)  |
| N2   | Lu1  | C27  | 96.40(9)   | C24  | C28  | C30  | 113.3(3)  |
| N2   | Lu1  | C24  | 140.30(9)  | C29  | C28  | C30  | 110.3(3)  |
| N1   | Lu1  | P1   | 60.89(7)   | C26  | C34  | C39  | 123.2(3)  |
| N1   | Lu1  | O1   | 87.46(9)   | C35  | C34  | C26  | 117.3(3)  |
| N1   | Lu1  | C23  | 116.46(10) | C35  | C34  | C39  | 119.5(3)  |
| N1   | Lu1  | N2   | 98.52(10)  | C34  | C35  | C36  | 122.5(3)  |
| N1   | Lu1  | C25  | 114.00(10) | C37  | C36  | C35  | 122.5(3)  |
| N1   | Lu1  | C26  | 145.56(9)  | C25  | C37  | C38  | 122.3(3)  |
| N1   | Lu1  | C27  | 147.85(10) | C36  | C37  | C25  | 118.3(3)  |

**Table S24 (Continued).** Bond Angles for **Lu( $\eta^5$ -(1,3-diisopropyl-4,7-dimethylindenyl)(<sup>A</sup>BiAMP<sup>tBu</sup>)(THF) (6).**

|     |     |     |            |     |     |     |          |
|-----|-----|-----|------------|-----|-----|-----|----------|
| N1  | Lu1 | C24 | 99.56(9)   | C36 | C37 | C38 | 119.3(3) |
| C25 | Lu1 | P1  | 129.48(7)  | N2  | C2  | P1  | 105.4(2) |
| C26 | Lu1 | P1  | 133.79(7)  | N2  | C15 | C16 | 124.8(3) |
| C26 | Lu1 | C25 | 31.63(9)   | N2  | C15 | C20 | 119.6(3) |
| C27 | Lu1 | P1  | 103.06(7)  | C16 | C15 | C20 | 115.7(3) |
| C27 | Lu1 | C25 | 52.39(9)   | C17 | C16 | C15 | 121.9(3) |
| C27 | Lu1 | C26 | 31.74(9)   | C16 | C17 | C21 | 119.5(4) |
| C27 | Lu1 | C24 | 52.77(9)   | C18 | C17 | C16 | 120.2(3) |
| C24 | Lu1 | P1  | 98.27(7)   | C18 | C17 | C21 | 120.3(4) |
| C24 | Lu1 | C25 | 31.26(9)   | C17 | C18 | C19 | 119.8(3) |
| C24 | Lu1 | C26 | 52.36(9)   | C18 | C19 | C22 | 120.2(3) |
| C2  | P1  | Lu1 | 79.59(10)  | C20 | C19 | C18 | 119.3(3) |
| C2  | P1  | C1  | 103.51(15) | C20 | C19 | C22 | 120.5(3) |
| C2  | P1  | C3  | 105.58(16) | C19 | C20 | C15 | 123.0(3) |
| C1  | P1  | Lu1 | 78.92(10)  | N1  | C1  | P1  | 103.8(2) |
| C1  | P1  | C3  | 107.04(15) | N1  | C7  | C8  | 117.7(3) |
| C3  | P1  | Lu1 | 170.54(11) | N1  | C7  | C12 | 125.0(3) |
| C43 | O1  | Lu1 | 118.69(18) | C12 | C7  | C8  | 117.3(3) |
| C40 | O1  | Lu1 | 132.38(19) | C9  | C8  | C7  | 122.4(3) |
| C40 | O1  | C43 | 108.9(2)   | C8  | C9  | C13 | 119.9(3) |
| C47 | O2  | C44 | 105.8(4)   | C8  | C9  | C10 | 118.7(3) |
| C27 | C23 | Lu1 | 74.69(17)  | C10 | C9  | C13 | 121.4(3) |
| C27 | C23 | C24 | 111.4(3)   | C11 | C10 | C9  | 120.5(3) |
| C24 | C23 | Lu1 | 75.60(17)  | C10 | C11 | C14 | 120.8(3) |
| C2  | N2  | Lu1 | 113.27(19) | C10 | C11 | C12 | 120.1(3) |
| C15 | N2  | Lu1 | 131.3(2)   | C12 | C11 | C14 | 119.0(3) |
| C15 | N2  | C2  | 115.4(3)   | C11 | C12 | C7  | 121.0(3) |
| C1  | N1  | Lu1 | 113.03(19) | C6  | C3  | P1  | 110.8(2) |
| C7  | N1  | Lu1 | 128.1(2)   | C6  | C3  | C5  | 109.7(3) |
| C7  | N1  | C1  | 117.3(3)   | C6  | C3  | C4  | 110.5(3) |
| C26 | C25 | Lu1 | 73.68(16)  | C5  | C3  | P1  | 109.0(2) |
| C24 | C25 | Lu1 | 72.91(16)  | C4  | C3  | P1  | 107.7(3) |
| C24 | C25 | C26 | 108.2(3)   | C4  | C3  | C5  | 109.2(3) |
| C24 | C25 | C37 | 132.2(3)   | O1  | C43 | C42 | 104.5(3) |
| C37 | C25 | Lu1 | 124.4(2)   | C43 | C42 | C41 | 101.7(3) |
| C37 | C25 | C26 | 119.2(3)   | C40 | C41 | C42 | 102.3(3) |
| C25 | C26 | Lu1 | 74.69(16)  | O1  | C40 | C41 | 105.3(3) |
| C27 | C26 | Lu1 | 72.37(16)  | C47 | C46 | C45 | 104.0(4) |
| C27 | C26 | C25 | 107.4(3)   | C44 | C45 | C46 | 102.8(4) |
| C34 | C26 | Lu1 | 123.4(2)   | O2  | C44 | C45 | 106.4(4) |
| C34 | C26 | C25 | 120.1(3)   | O2  | C47 | C46 | 107.6(4) |
| C34 | C26 | C27 | 132.1(3)   |     |     |     |          |

3.10 [La( $\eta^5$ -(1,3-diisopropyl-4,7-dimethylindenyl))(<sup>Ar</sup>BiAMP<sup>tBu</sup>)]<sub>2</sub> connectivity structure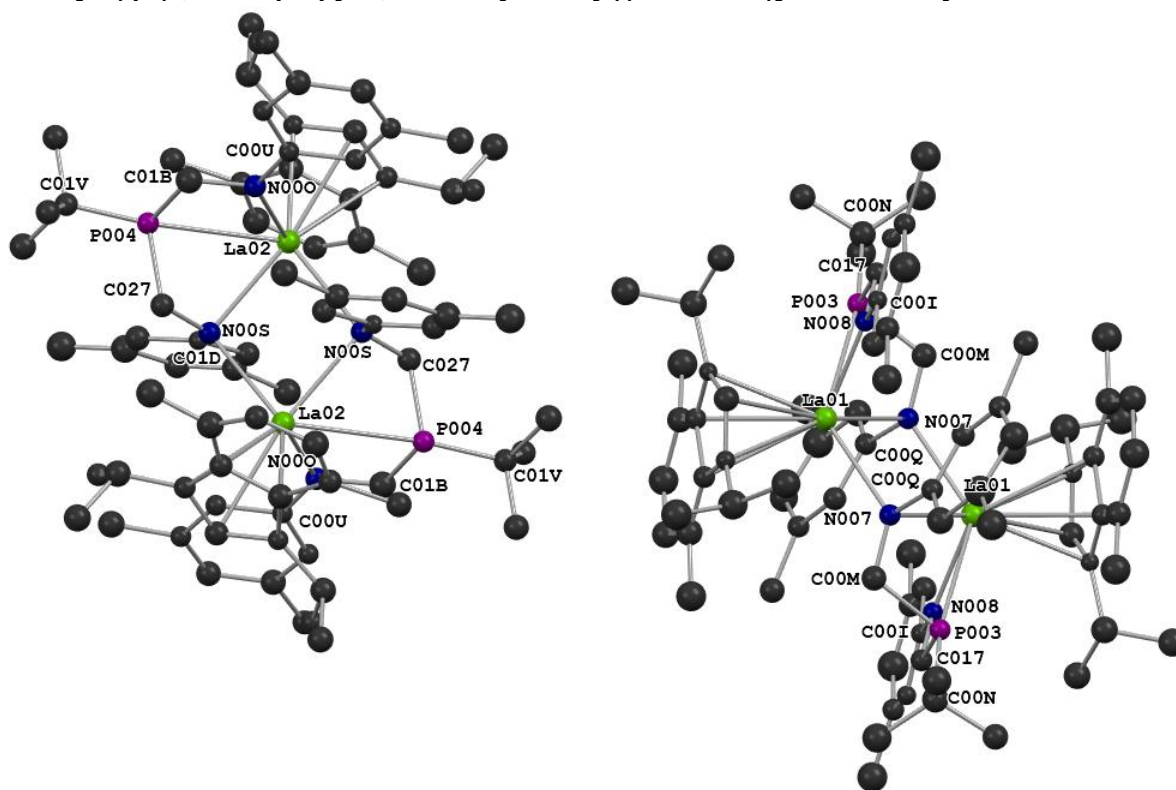

Figure S60. Solid state connectivity structure of [La( $\eta^5$ -(1,3-diisopropyl-4,7-dimethylindenyl))(<sup>Ar</sup>BiAMP<sup>tBu</sup>)]<sub>2</sub> (recrystallized from diethyl ether) shown with hydrogen atoms omitted for clarity. The

Table S25. Crystal data and structure refinement for [La( $\eta^5$ -(1,3-diisopropyl-4,7-dimethylindenyl))(<sup>Ar</sup>BiAMP<sup>tBu</sup>)]<sub>2</sub>.

|                                             |                                                                                               |
|---------------------------------------------|-----------------------------------------------------------------------------------------------|
| Empirical formula                           | C <sub>88</sub> H <sub>100</sub> La <sub>2</sub> N <sub>4</sub> O <sub>4</sub> P <sub>2</sub> |
| Formula weight                              | 1617.47                                                                                       |
| Temperature/K                               | 108.0                                                                                         |
| Crystal system                              | triclinic                                                                                     |
| Space group                                 | P-1                                                                                           |
| a/Å                                         | 13.5052(14)                                                                                   |
| b/Å                                         | 14.2084(14)                                                                                   |
| c/Å                                         | 21.380(2)                                                                                     |
| $\alpha$ /°                                 | 75.505(6)                                                                                     |
| $\beta$ /°                                  | 77.674(6)                                                                                     |
| $\gamma$ /°                                 | 75.599(6)                                                                                     |
| Volume/Å <sup>3</sup>                       | 3796.8(7)                                                                                     |
| Z                                           | 2                                                                                             |
| $\rho_{\text{calc}}$ /cm <sup>3</sup>       | 1.415                                                                                         |
| $\mu$ /mm <sup>-1</sup>                     | 1.206                                                                                         |
| F(000)                                      | 1664.0                                                                                        |
| Crystal size/mm <sup>3</sup>                | ? × ? × ?                                                                                     |
| Radiation                                   | MoK $\alpha$ ( $\lambda$ = 0.71073)                                                           |
| 2 $\theta$ range for data collection/°      | 3.956 to 50.694                                                                               |
| Index ranges                                | -16 ≤ h ≤ 16, -16 ≤ k ≤ 17, -20 ≤ l ≤ 25                                                      |
| Reflections collected                       | 39437                                                                                         |
| Independent reflections                     | 13842 [R <sub>int</sub> = 0.1120, R <sub>sigma</sub> = 0.1427]                                |
| Data/restraints/parameters                  | 13842/0/372                                                                                   |
| Goodness-of-fit on F <sup>2</sup>           | 1.248                                                                                         |
| Final R indexes [ $I \geq 2\sigma(I)$ ]     | R <sub>1</sub> = 0.2350, wR <sub>2</sub> = 0.5269                                             |
| Final R indexes [all data]                  | R <sub>1</sub> = 0.2601, wR <sub>2</sub> = 0.5371                                             |
| Largest diff. peak/hole / e Å <sup>-3</sup> | 9.53/-3.07                                                                                    |

### 3.11 References

1. Conway, B.; Graham, D. V.; Hevia, E.; Kennedy, A. R.; Klett, J.; Mulvey, R. E. *Chem. Commun.* **2008**, 23, 2638–2640.
2. G. P. McGovern, F. Hung-Low, J. W. Tye and C. A. Bradley, *Organometallics*, 2012, **31**, 3865-3879
3. Bruker Instrument Service, Version 2010.1.0.0; Bruker AXS Inc.: Madison, WI, USA, **2010**.
4. SAINT Plus, Data Reduction Software, Version 7.68A; Bruker AXS Inc.: Madison, WI, USA, 2009.
5. G. M. Sheldrick, *Acta Crystallogr., Sect. A: Found. Crystallogr.* A64, 2008, 112–122.
6. G.M. Sheldrick, SADABS, University of Göttingen, Germany: 2005.
7. G. M. Sheldrick, *Acta Crystallogr., Sect. A: Found. Adv.* C71, 2015, 3–8;
8. APEX2, Data Refinement Software, Version 2010.1-2; Bruker AXS Inc.: Madison, WI, USA, 2010.
9. Olex2 1.2 (compiled 2014.06.27) svn.r2953 for OlexSys, GUI svn.r4855.
10. O. V. Dolomanov, L. J. Bourhis, R. J. Gildea, J. A. K. Howard and H. Puschmann, *J. Appl. Cryst.*, 2009, **42**, 339-341.
